# Supplementary material for: Simulation study to demonstrate biases created by diagnostic criteria of mental illnesses: major depressive episodes, dysthymia, and manic episodes
Source: PubMed Central journal article supplement — BMJ Open. 2020 Nov 10;10(11):e037022. doi: 10.1136/bmjopen-2020-037022 (PMC7656951; doi:10.1136/bmjopen-2020-037022), 2020-11-10

1 A simulation study to demonstrate the  
2 biases in the diagnoses of mental  
3 illnesses: major depressive episodes,  
4 dysthymia, and manic episodes

---

5 **Yi-Sheng Chao<sup>1\*</sup>, Kuan-Fu Lin,<sup>2</sup> Chao-Jung Wu<sup>3</sup>, Hsing-Chien Wu<sup>4</sup>, Hui-Ting**  
6 **Hsu<sup>5</sup>, Lien-Cheng Tsao<sup>5</sup>, Yen-Po Cheng<sup>5</sup>, Yi-Chun Lai<sup>6</sup>, Wei-Chih Chen<sup>7,8</sup>**

7 *<sup>1</sup>Independent researcher, Montréal, H2X 0A8 Canada, <sup>2</sup>National Taiwan*  
8 *University Hospital Yun-Lin Branch, Yunlin County, 640 Taiwan, <sup>3</sup>Département*  
9 *d'informatique Université du Québec à Montréal, Montréal H3B 1B4 Canada,*  
10 *<sup>4</sup>Taipei Hospital Ministry of Health and Welfare New Taipei city, 242 Taiwan,*  
11 *<sup>5</sup>Changhua Christian Hospital, Changhua County 526, Taiwan, <sup>6</sup>National Yang-*  
12 *Ming University Hospital, Yilan 260 Taiwan, <sup>7</sup>Department of Chest Medicine,*  
13 *Taipei Veterans General Hospital, Taipei 112, Taiwan, <sup>8</sup>Institute of Emergency*  
14 *and Critical Care Medicine, National Yang-Ming University, Taipei 112, Taiwan*  
15 *\*chaoyisheng@post.harvard.edu*

16 **Keywords:** Frailty; bias; forward-stepwise regression; the Health and  
17 Retirement Study; index mining  
18

19

| Measure                               | Item                                                                                                                                 | Item description                                                                                                                                   | Item type                                         | Item format                                                                                                                                                                                                                                                                                                                                                                                                                                                                                                                                                                                                                                                                                                                                                                                                                                                                                                                                                                                                                                                                                                                                                                                                                                                                                                                                                                                                                                                                                                                                                                                                                                                                                                                                                                                                                                                                                                                                                                                                                                                                                                                                                                                                                                                                                                                                                                                                                                                                                                                                                                                                                                                                                                                                                                                                                                                                                                                                                                                                                                                                                                                                                                                                                                                                                                                                                                                                                                                                                                                                                                                                                                                                                                                                                                                                                                                                                                                                                                                                                                                                                                                                                                                                                                                                                                                                                                                                                                                                                                                                                                                                                                                                                                                                                                                                                                                                                                                                                                                                                                                                                                                                                                                                                                                                                                                                                                                                                                                                                                                                                                                                                                                                                                                                                                                                                                                                                                                                                                                                                                                                                                                                                                                                                                                                                                                                                                                                                                                                                                                                                                                                                                                                                                                                                                                                                                                                                                                                                                                                                                                                                                                                                                                                                                                                                                                                                                                                                                                                                                                                                                                                                                                                                                                                                                                                                                                                                                                                                                                                                                                                                                                                                                                                                                                                                                                                                                                                                                                                                                                                                                                                                                                                                                                                                                                                                                                                                                                                                                                                                                                                                                                                                                                                                                                                                                                                                                                                                                                      | Item range                        | Item units | Item scale | Item score | Item score range | Item score interpretation |
|---------------------------------------|--------------------------------------------------------------------------------------------------------------------------------------|----------------------------------------------------------------------------------------------------------------------------------------------------|---------------------------------------------------|------------------------------------------------------------------------------------------------------------------------------------------------------------------------------------------------------------------------------------------------------------------------------------------------------------------------------------------------------------------------------------------------------------------------------------------------------------------------------------------------------------------------------------------------------------------------------------------------------------------------------------------------------------------------------------------------------------------------------------------------------------------------------------------------------------------------------------------------------------------------------------------------------------------------------------------------------------------------------------------------------------------------------------------------------------------------------------------------------------------------------------------------------------------------------------------------------------------------------------------------------------------------------------------------------------------------------------------------------------------------------------------------------------------------------------------------------------------------------------------------------------------------------------------------------------------------------------------------------------------------------------------------------------------------------------------------------------------------------------------------------------------------------------------------------------------------------------------------------------------------------------------------------------------------------------------------------------------------------------------------------------------------------------------------------------------------------------------------------------------------------------------------------------------------------------------------------------------------------------------------------------------------------------------------------------------------------------------------------------------------------------------------------------------------------------------------------------------------------------------------------------------------------------------------------------------------------------------------------------------------------------------------------------------------------------------------------------------------------------------------------------------------------------------------------------------------------------------------------------------------------------------------------------------------------------------------------------------------------------------------------------------------------------------------------------------------------------------------------------------------------------------------------------------------------------------------------------------------------------------------------------------------------------------------------------------------------------------------------------------------------------------------------------------------------------------------------------------------------------------------------------------------------------------------------------------------------------------------------------------------------------------------------------------------------------------------------------------------------------------------------------------------------------------------------------------------------------------------------------------------------------------------------------------------------------------------------------------------------------------------------------------------------------------------------------------------------------------------------------------------------------------------------------------------------------------------------------------------------------------------------------------------------------------------------------------------------------------------------------------------------------------------------------------------------------------------------------------------------------------------------------------------------------------------------------------------------------------------------------------------------------------------------------------------------------------------------------------------------------------------------------------------------------------------------------------------------------------------------------------------------------------------------------------------------------------------------------------------------------------------------------------------------------------------------------------------------------------------------------------------------------------------------------------------------------------------------------------------------------------------------------------------------------------------------------------------------------------------------------------------------------------------------------------------------------------------------------------------------------------------------------------------------------------------------------------------------------------------------------------------------------------------------------------------------------------------------------------------------------------------------------------------------------------------------------------------------------------------------------------------------------------------------------------------------------------------------------------------------------------------------------------------------------------------------------------------------------------------------------------------------------------------------------------------------------------------------------------------------------------------------------------------------------------------------------------------------------------------------------------------------------------------------------------------------------------------------------------------------------------------------------------------------------------------------------------------------------------------------------------------------------------------------------------------------------------------------------------------------------------------------------------------------------------------------------------------------------------------------------------------------------------------------------------------------------------------------------------------------------------------------------------------------------------------------------------------------------------------------------------------------------------------------------------------------------------------------------------------------------------------------------------------------------------------------------------------------------------------------------------------------------------------------------------------------------------------------------------------------------------------------------------------------------------------------------------------------------------------------------------------------------------------------------------------------------------------------------------------------------------------------------------------------------------------------------------------------------------------------------------------------------------------------------------------------------------------------------------------------------------------------------------------------------------------------------------------------------------------------------------------------------------------------------------------------------------------------------------------------------------------------------------------------------------------------------------------------------------------------------------------------------------------------------------------------------------------------------------------------------------------------------------------------------------------------------------------------------------------------------------------------------------------------------------------------------------------------------------------------------------------------------------------------------------------------------------------------------------------------------------------------------------------------------------------------------------------------------------------------------------------------------------------------------------------------------------------------------------------------------------------------------------------------------------------------------------------------------------------------------------------------------------------------------------------------------------------------------------------------------------------------------------------------------------------------------------------------------------|-----------------------------------|------------|------------|------------|------------------|---------------------------|
| Major depression                      | Major criteria, essential for diagnosis                                                                                              | Depressed mood or a loss of interest or pleasure in daily activities for more than two weeks.                                                      | Major criteria                                    | Depressed mood                                                                                                                                                                                                                                                                                                                                                                                                                                                                                                                                                                                                                                                                                                                                                                                                                                                                                                                                                                                                                                                                                                                                                                                                                                                                                                                                                                                                                                                                                                                                                                                                                                                                                                                                                                                                                                                                                                                                                                                                                                                                                                                                                                                                                                                                                                                                                                                                                                                                                                                                                                                                                                                                                                                                                                                                                                                                                                                                                                                                                                                                                                                                                                                                                                                                                                                                                                                                                                                                                                                                                                                                                                                                                                                                                                                                                                                                                                                                                                                                                                                                                                                                                                                                                                                                                                                                                                                                                                                                                                                                                                                                                                                                                                                                                                                                                                                                                                                                                                                                                                                                                                                                                                                                                                                                                                                                                                                                                                                                                                                                                                                                                                                                                                                                                                                                                                                                                                                                                                                                                                                                                                                                                                                                                                                                                                                                                                                                                                                                                                                                                                                                                                                                                                                                                                                                                                                                                                                                                                                                                                                                                                                                                                                                                                                                                                                                                                                                                                                                                                                                                                                                                                                                                                                                                                                                                                                                                                                                                                                                                                                                                                                                                                                                                                                                                                                                                                                                                                                                                                                                                                                                                                                                                                                                                                                                                                                                                                                                                                                                                                                                                                                                                                                                                                                                                                                                                                                                                                                   | 0-4                               |            | 0-4        | 0-4        | 0-4              | Major depression          |
|                                       | Major criteria, essential for diagnosis                                                                                              | Depressed mood or a loss of interest or pleasure in daily activities for more than two weeks.                                                      | Depressed mood, m1                                | Depressed mood                                                                                                                                                                                                                                                                                                                                                                                                                                                                                                                                                                                                                                                                                                                                                                                                                                                                                                                                                                                                                                                                                                                                                                                                                                                                                                                                                                                                                                                                                                                                                                                                                                                                                                                                                                                                                                                                                                                                                                                                                                                                                                                                                                                                                                                                                                                                                                                                                                                                                                                                                                                                                                                                                                                                                                                                                                                                                                                                                                                                                                                                                                                                                                                                                                                                                                                                                                                                                                                                                                                                                                                                                                                                                                                                                                                                                                                                                                                                                                                                                                                                                                                                                                                                                                                                                                                                                                                                                                                                                                                                                                                                                                                                                                                                                                                                                                                                                                                                                                                                                                                                                                                                                                                                                                                                                                                                                                                                                                                                                                                                                                                                                                                                                                                                                                                                                                                                                                                                                                                                                                                                                                                                                                                                                                                                                                                                                                                                                                                                                                                                                                                                                                                                                                                                                                                                                                                                                                                                                                                                                                                                                                                                                                                                                                                                                                                                                                                                                                                                                                                                                                                                                                                                                                                                                                                                                                                                                                                                                                                                                                                                                                                                                                                                                                                                                                                                                                                                                                                                                                                                                                                                                                                                                                                                                                                                                                                                                                                                                                                                                                                                                                                                                                                                                                                                                                                                                                                                                                                   | 0-1                               |            | 0-1        | 0-1        | 0-1              | Major depression          |
|                                       |                                                                                                                                      |                                                                                                                                                    | Loss of interest, m2                              | Loss of interest                                                                                                                                                                                                                                                                                                                                                                                                                                                                                                                                                                                                                                                                                                                                                                                                                                                                                                                                                                                                                                                                                                                                                                                                                                                                                                                                                                                                                                                                                                                                                                                                                                                                                                                                                                                                                                                                                                                                                                                                                                                                                                                                                                                                                                                                                                                                                                                                                                                                                                                                                                                                                                                                                                                                                                                                                                                                                                                                                                                                                                                                                                                                                                                                                                                                                                                                                                                                                                                                                                                                                                                                                                                                                                                                                                                                                                                                                                                                                                                                                                                                                                                                                                                                                                                                                                                                                                                                                                                                                                                                                                                                                                                                                                                                                                                                                                                                                                                                                                                                                                                                                                                                                                                                                                                                                                                                                                                                                                                                                                                                                                                                                                                                                                                                                                                                                                                                                                                                                                                                                                                                                                                                                                                                                                                                                                                                                                                                                                                                                                                                                                                                                                                                                                                                                                                                                                                                                                                                                                                                                                                                                                                                                                                                                                                                                                                                                                                                                                                                                                                                                                                                                                                                                                                                                                                                                                                                                                                                                                                                                                                                                                                                                                                                                                                                                                                                                                                                                                                                                                                                                                                                                                                                                                                                                                                                                                                                                                                                                                                                                                                                                                                                                                                                                                                                                                                                                                                                                                                 | 0-1                               |            | 0-1        | 0-1        | 0-1              | Major depression          |
|                                       |                                                                                                                                      |                                                                                                                                                    | Information on m1, m2                             | Information on m1, m2                                                                                                                                                                                                                                                                                                                                                                                                                                                                                                                                                                                                                                                                                                                                                                                                                                                                                                                                                                                                                                                                                                                                                                                                                                                                                                                                                                                                                                                                                                                                                                                                                                                                                                                                                                                                                                                                                                                                                                                                                                                                                                                                                                                                                                                                                                                                                                                                                                                                                                                                                                                                                                                                                                                                                                                                                                                                                                                                                                                                                                                                                                                                                                                                                                                                                                                                                                                                                                                                                                                                                                                                                                                                                                                                                                                                                                                                                                                                                                                                                                                                                                                                                                                                                                                                                                                                                                                                                                                                                                                                                                                                                                                                                                                                                                                                                                                                                                                                                                                                                                                                                                                                                                                                                                                                                                                                                                                                                                                                                                                                                                                                                                                                                                                                                                                                                                                                                                                                                                                                                                                                                                                                                                                                                                                                                                                                                                                                                                                                                                                                                                                                                                                                                                                                                                                                                                                                                                                                                                                                                                                                                                                                                                                                                                                                                                                                                                                                                                                                                                                                                                                                                                                                                                                                                                                                                                                                                                                                                                                                                                                                                                                                                                                                                                                                                                                                                                                                                                                                                                                                                                                                                                                                                                                                                                                                                                                                                                                                                                                                                                                                                                                                                                                                                                                                                                                                                                                                                                            | 0-1                               |            | 0-1        | 0-1        | 0-1              | Major depression          |
|                                       | Minor criteria, m3                                                                                                                   | Significant anorexia, m3                                                                                                                           | Significant anorexia, m3                          | Significant anorexia, m3                                                                                                                                                                                                                                                                                                                                                                                                                                                                                                                                                                                                                                                                                                                                                                                                                                                                                                                                                                                                                                                                                                                                                                                                                                                                                                                                                                                                                                                                                                                                                                                                                                                                                                                                                                                                                                                                                                                                                                                                                                                                                                                                                                                                                                                                                                                                                                                                                                                                                                                                                                                                                                                                                                                                                                                                                                                                                                                                                                                                                                                                                                                                                                                                                                                                                                                                                                                                                                                                                                                                                                                                                                                                                                                                                                                                                                                                                                                                                                                                                                                                                                                                                                                                                                                                                                                                                                                                                                                                                                                                                                                                                                                                                                                                                                                                                                                                                                                                                                                                                                                                                                                                                                                                                                                                                                                                                                                                                                                                                                                                                                                                                                                                                                                                                                                                                                                                                                                                                                                                                                                                                                                                                                                                                                                                                                                                                                                                                                                                                                                                                                                                                                                                                                                                                                                                                                                                                                                                                                                                                                                                                                                                                                                                                                                                                                                                                                                                                                                                                                                                                                                                                                                                                                                                                                                                                                                                                                                                                                                                                                                                                                                                                                                                                                                                                                                                                                                                                                                                                                                                                                                                                                                                                                                                                                                                                                                                                                                                                                                                                                                                                                                                                                                                                                                                                                                                                                                                                                         | Significant anorexia              | 0-1        |            | 0-1        | 0-1              | Major depression          |
|                                       |                                                                                                                                      |                                                                                                                                                    |                                                   | Information on m3                                                                                                                                                                                                                                                                                                                                                                                                                                                                                                                                                                                                                                                                                                                                                                                                                                                                                                                                                                                                                                                                                                                                                                                                                                                                                                                                                                                                                                                                                                                                                                                                                                                                                                                                                                                                                                                                                                                                                                                                                                                                                                                                                                                                                                                                                                                                                                                                                                                                                                                                                                                                                                                                                                                                                                                                                                                                                                                                                                                                                                                                                                                                                                                                                                                                                                                                                                                                                                                                                                                                                                                                                                                                                                                                                                                                                                                                                                                                                                                                                                                                                                                                                                                                                                                                                                                                                                                                                                                                                                                                                                                                                                                                                                                                                                                                                                                                                                                                                                                                                                                                                                                                                                                                                                                                                                                                                                                                                                                                                                                                                                                                                                                                                                                                                                                                                                                                                                                                                                                                                                                                                                                                                                                                                                                                                                                                                                                                                                                                                                                                                                                                                                                                                                                                                                                                                                                                                                                                                                                                                                                                                                                                                                                                                                                                                                                                                                                                                                                                                                                                                                                                                                                                                                                                                                                                                                                                                                                                                                                                                                                                                                                                                                                                                                                                                                                                                                                                                                                                                                                                                                                                                                                                                                                                                                                                                                                                                                                                                                                                                                                                                                                                                                                                                                                                                                                                                                                                                                                | Information on m3                 | 0-1        |            | 0-1        | 0-1              | Major depression          |
|                                       |                                                                                                                                      |                                                                                                                                                    |                                                   | Information on m1, m2, m3                                                                                                                                                                                                                                                                                                                                                                                                                                                                                                                                                                                                                                                                                                                                                                                                                                                                                                                                                                                                                                                                                                                                                                                                                                                                                                                                                                                                                                                                                                                                                                                                                                                                                                                                                                                                                                                                                                                                                                                                                                                                                                                                                                                                                                                                                                                                                                                                                                                                                                                                                                                                                                                                                                                                                                                                                                                                                                                                                                                                                                                                                                                                                                                                                                                                                                                                                                                                                                                                                                                                                                                                                                                                                                                                                                                                                                                                                                                                                                                                                                                                                                                                                                                                                                                                                                                                                                                                                                                                                                                                                                                                                                                                                                                                                                                                                                                                                                                                                                                                                                                                                                                                                                                                                                                                                                                                                                                                                                                                                                                                                                                                                                                                                                                                                                                                                                                                                                                                                                                                                                                                                                                                                                                                                                                                                                                                                                                                                                                                                                                                                                                                                                                                                                                                                                                                                                                                                                                                                                                                                                                                                                                                                                                                                                                                                                                                                                                                                                                                                                                                                                                                                                                                                                                                                                                                                                                                                                                                                                                                                                                                                                                                                                                                                                                                                                                                                                                                                                                                                                                                                                                                                                                                                                                                                                                                                                                                                                                                                                                                                                                                                                                                                                                                                                                                                                                                                                                                                                        | Information on m1, m2, m3         | 0-1        |            | 0-1        | 0-1              | Major depression          |
|                                       | Insomnia or tired, m4                                                                                                                | Insomnia or tired, m4                                                                                                                              | Insomnia or tired, m4                             | Insomnia or tired, m4                                                                                                                                                                                                                                                                                                                                                                                                                                                                                                                                                                                                                                                                                                                                                                                                                                                                                                                                                                                                                                                                                                                                                                                                                                                                                                                                                                                                                                                                                                                                                                                                                                                                                                                                                                                                                                                                                                                                                                                                                                                                                                                                                                                                                                                                                                                                                                                                                                                                                                                                                                                                                                                                                                                                                                                                                                                                                                                                                                                                                                                                                                                                                                                                                                                                                                                                                                                                                                                                                                                                                                                                                                                                                                                                                                                                                                                                                                                                                                                                                                                                                                                                                                                                                                                                                                                                                                                                                                                                                                                                                                                                                                                                                                                                                                                                                                                                                                                                                                                                                                                                                                                                                                                                                                                                                                                                                                                                                                                                                                                                                                                                                                                                                                                                                                                                                                                                                                                                                                                                                                                                                                                                                                                                                                                                                                                                                                                                                                                                                                                                                                                                                                                                                                                                                                                                                                                                                                                                                                                                                                                                                                                                                                                                                                                                                                                                                                                                                                                                                                                                                                                                                                                                                                                                                                                                                                                                                                                                                                                                                                                                                                                                                                                                                                                                                                                                                                                                                                                                                                                                                                                                                                                                                                                                                                                                                                                                                                                                                                                                                                                                                                                                                                                                                                                                                                                                                                                                                                            | Insomnia or tired                 | 0-1        |            | 0-1        | 0-1              | Major depression          |
|                                       |                                                                                                                                      |                                                                                                                                                    |                                                   | Information on m4                                                                                                                                                                                                                                                                                                                                                                                                                                                                                                                                                                                                                                                                                                                                                                                                                                                                                                                                                                                                                                                                                                                                                                                                                                                                                                                                                                                                                                                                                                                                                                                                                                                                                                                                                                                                                                                                                                                                                                                                                                                                                                                                                                                                                                                                                                                                                                                                                                                                                                                                                                                                                                                                                                                                                                                                                                                                                                                                                                                                                                                                                                                                                                                                                                                                                                                                                                                                                                                                                                                                                                                                                                                                                                                                                                                                                                                                                                                                                                                                                                                                                                                                                                                                                                                                                                                                                                                                                                                                                                                                                                                                                                                                                                                                                                                                                                                                                                                                                                                                                                                                                                                                                                                                                                                                                                                                                                                                                                                                                                                                                                                                                                                                                                                                                                                                                                                                                                                                                                                                                                                                                                                                                                                                                                                                                                                                                                                                                                                                                                                                                                                                                                                                                                                                                                                                                                                                                                                                                                                                                                                                                                                                                                                                                                                                                                                                                                                                                                                                                                                                                                                                                                                                                                                                                                                                                                                                                                                                                                                                                                                                                                                                                                                                                                                                                                                                                                                                                                                                                                                                                                                                                                                                                                                                                                                                                                                                                                                                                                                                                                                                                                                                                                                                                                                                                                                                                                                                                                                | Information on m4                 | 0-1        |            | 0-1        | 0-1              | Major depression          |
|                                       |                                                                                                                                      |                                                                                                                                                    |                                                   | Information on m1, m2, m3, m4                                                                                                                                                                                                                                                                                                                                                                                                                                                                                                                                                                                                                                                                                                                                                                                                                                                                                                                                                                                                                                                                                                                                                                                                                                                                                                                                                                                                                                                                                                                                                                                                                                                                                                                                                                                                                                                                                                                                                                                                                                                                                                                                                                                                                                                                                                                                                                                                                                                                                                                                                                                                                                                                                                                                                                                                                                                                                                                                                                                                                                                                                                                                                                                                                                                                                                                                                                                                                                                                                                                                                                                                                                                                                                                                                                                                                                                                                                                                                                                                                                                                                                                                                                                                                                                                                                                                                                                                                                                                                                                                                                                                                                                                                                                                                                                                                                                                                                                                                                                                                                                                                                                                                                                                                                                                                                                                                                                                                                                                                                                                                                                                                                                                                                                                                                                                                                                                                                                                                                                                                                                                                                                                                                                                                                                                                                                                                                                                                                                                                                                                                                                                                                                                                                                                                                                                                                                                                                                                                                                                                                                                                                                                                                                                                                                                                                                                                                                                                                                                                                                                                                                                                                                                                                                                                                                                                                                                                                                                                                                                                                                                                                                                                                                                                                                                                                                                                                                                                                                                                                                                                                                                                                                                                                                                                                                                                                                                                                                                                                                                                                                                                                                                                                                                                                                                                                                                                                                                                                    | Information on m1, m2, m3, m4     | 0-1        |            | 0-1        | 0-1              | Major depression          |
|                                       | Agitation or irritable, m5                                                                                                           | Agitation or irritable, m5                                                                                                                         | Agitation or irritable, m5                        | Agitation or irritable, m5                                                                                                                                                                                                                                                                                                                                                                                                                                                                                                                                                                                                                                                                                                                                                                                                                                                                                                                                                                                                                                                                                                                                                                                                                                                                                                                                                                                                                                                                                                                                                                                                                                                                                                                                                                                                                                                                                                                                                                                                                                                                                                                                                                                                                                                                                                                                                                                                                                                                                                                                                                                                                                                                                                                                                                                                                                                                                                                                                                                                                                                                                                                                                                                                                                                                                                                                                                                                                                                                                                                                                                                                                                                                                                                                                                                                                                                                                                                                                                                                                                                                                                                                                                                                                                                                                                                                                                                                                                                                                                                                                                                                                                                                                                                                                                                                                                                                                                                                                                                                                                                                                                                                                                                                                                                                                                                                                                                                                                                                                                                                                                                                                                                                                                                                                                                                                                                                                                                                                                                                                                                                                                                                                                                                                                                                                                                                                                                                                                                                                                                                                                                                                                                                                                                                                                                                                                                                                                                                                                                                                                                                                                                                                                                                                                                                                                                                                                                                                                                                                                                                                                                                                                                                                                                                                                                                                                                                                                                                                                                                                                                                                                                                                                                                                                                                                                                                                                                                                                                                                                                                                                                                                                                                                                                                                                                                                                                                                                                                                                                                                                                                                                                                                                                                                                                                                                                                                                                                                                       | Agitation or irritable            | 0-1        |            | 0-1        | 0-1              | Major depression          |
|                                       |                                                                                                                                      |                                                                                                                                                    |                                                   | Information on m5                                                                                                                                                                                                                                                                                                                                                                                                                                                                                                                                                                                                                                                                                                                                                                                                                                                                                                                                                                                                                                                                                                                                                                                                                                                                                                                                                                                                                                                                                                                                                                                                                                                                                                                                                                                                                                                                                                                                                                                                                                                                                                                                                                                                                                                                                                                                                                                                                                                                                                                                                                                                                                                                                                                                                                                                                                                                                                                                                                                                                                                                                                                                                                                                                                                                                                                                                                                                                                                                                                                                                                                                                                                                                                                                                                                                                                                                                                                                                                                                                                                                                                                                                                                                                                                                                                                                                                                                                                                                                                                                                                                                                                                                                                                                                                                                                                                                                                                                                                                                                                                                                                                                                                                                                                                                                                                                                                                                                                                                                                                                                                                                                                                                                                                                                                                                                                                                                                                                                                                                                                                                                                                                                                                                                                                                                                                                                                                                                                                                                                                                                                                                                                                                                                                                                                                                                                                                                                                                                                                                                                                                                                                                                                                                                                                                                                                                                                                                                                                                                                                                                                                                                                                                                                                                                                                                                                                                                                                                                                                                                                                                                                                                                                                                                                                                                                                                                                                                                                                                                                                                                                                                                                                                                                                                                                                                                                                                                                                                                                                                                                                                                                                                                                                                                                                                                                                                                                                                                                                | Information on m5                 | 0-1        |            | 0-1        | 0-1              | Major depression          |
|                                       |                                                                                                                                      |                                                                                                                                                    |                                                   | Information on m1, m2, m3, m4, m5                                                                                                                                                                                                                                                                                                                                                                                                                                                                                                                                                                                                                                                                                                                                                                                                                                                                                                                                                                                                                                                                                                                                                                                                                                                                                                                                                                                                                                                                                                                                                                                                                                                                                                                                                                                                                                                                                                                                                                                                                                                                                                                                                                                                                                                                                                                                                                                                                                                                                                                                                                                                                                                                                                                                                                                                                                                                                                                                                                                                                                                                                                                                                                                                                                                                                                                                                                                                                                                                                                                                                                                                                                                                                                                                                                                                                                                                                                                                                                                                                                                                                                                                                                                                                                                                                                                                                                                                                                                                                                                                                                                                                                                                                                                                                                                                                                                                                                                                                                                                                                                                                                                                                                                                                                                                                                                                                                                                                                                                                                                                                                                                                                                                                                                                                                                                                                                                                                                                                                                                                                                                                                                                                                                                                                                                                                                                                                                                                                                                                                                                                                                                                                                                                                                                                                                                                                                                                                                                                                                                                                                                                                                                                                                                                                                                                                                                                                                                                                                                                                                                                                                                                                                                                                                                                                                                                                                                                                                                                                                                                                                                                                                                                                                                                                                                                                                                                                                                                                                                                                                                                                                                                                                                                                                                                                                                                                                                                                                                                                                                                                                                                                                                                                                                                                                                                                                                                                                                                                | Information on m1, m2, m3, m4, m5 | 0-1        |            | 0-1        | 0-1              | Major depression          |
|                                       | Fatigue or trouble, m6                                                                                                               | Fatigue or trouble, m6                                                                                                                             | Fatigue or trouble, m6                            | Fatigue or trouble, m6                                                                                                                                                                                                                                                                                                                                                                                                                                                                                                                                                                                                                                                                                                                                                                                                                                                                                                                                                                                                                                                                                                                                                                                                                                                                                                                                                                                                                                                                                                                                                                                                                                                                                                                                                                                                                                                                                                                                                                                                                                                                                                                                                                                                                                                                                                                                                                                                                                                                                                                                                                                                                                                                                                                                                                                                                                                                                                                                                                                                                                                                                                                                                                                                                                                                                                                                                                                                                                                                                                                                                                                                                                                                                                                                                                                                                                                                                                                                                                                                                                                                                                                                                                                                                                                                                                                                                                                                                                                                                                                                                                                                                                                                                                                                                                                                                                                                                                                                                                                                                                                                                                                                                                                                                                                                                                                                                                                                                                                                                                                                                                                                                                                                                                                                                                                                                                                                                                                                                                                                                                                                                                                                                                                                                                                                                                                                                                                                                                                                                                                                                                                                                                                                                                                                                                                                                                                                                                                                                                                                                                                                                                                                                                                                                                                                                                                                                                                                                                                                                                                                                                                                                                                                                                                                                                                                                                                                                                                                                                                                                                                                                                                                                                                                                                                                                                                                                                                                                                                                                                                                                                                                                                                                                                                                                                                                                                                                                                                                                                                                                                                                                                                                                                                                                                                                                                                                                                                                                                           | Fatigue or trouble                | 0-1        |            | 0-1        | 0-1              | Major depression          |
|                                       |                                                                                                                                      |                                                                                                                                                    |                                                   | Information on m6                                                                                                                                                                                                                                                                                                                                                                                                                                                                                                                                                                                                                                                                                                                                                                                                                                                                                                                                                                                                                                                                                                                                                                                                                                                                                                                                                                                                                                                                                                                                                                                                                                                                                                                                                                                                                                                                                                                                                                                                                                                                                                                                                                                                                                                                                                                                                                                                                                                                                                                                                                                                                                                                                                                                                                                                                                                                                                                                                                                                                                                                                                                                                                                                                                                                                                                                                                                                                                                                                                                                                                                                                                                                                                                                                                                                                                                                                                                                                                                                                                                                                                                                                                                                                                                                                                                                                                                                                                                                                                                                                                                                                                                                                                                                                                                                                                                                                                                                                                                                                                                                                                                                                                                                                                                                                                                                                                                                                                                                                                                                                                                                                                                                                                                                                                                                                                                                                                                                                                                                                                                                                                                                                                                                                                                                                                                                                                                                                                                                                                                                                                                                                                                                                                                                                                                                                                                                                                                                                                                                                                                                                                                                                                                                                                                                                                                                                                                                                                                                                                                                                                                                                                                                                                                                                                                                                                                                                                                                                                                                                                                                                                                                                                                                                                                                                                                                                                                                                                                                                                                                                                                                                                                                                                                                                                                                                                                                                                                                                                                                                                                                                                                                                                                                                                                                                                                                                                                                                                                | Information on m6                 | 0-1        |            | 0-1        | 0-1              | Major depression          |
| Information on m1, m2, m3, m4, m5, m6 |                                                                                                                                      |                                                                                                                                                    |                                                   | Information on m1, m2, m3, m4, m5, m6                                                                                                                                                                                                                                                                                                                                                                                                                                                                                                                                                                                                                                                                                                                                                                                                                                                                                                                                                                                                                                                                                                                                                                                                                                                                                                                                                                                                                                                                                                                                                                                                                                                                                                                                                                                                                                                                                                                                                                                                                                                                                                                                                                                                                                                                                                                                                                                                                                                                                                                                                                                                                                                                                                                                                                                                                                                                                                                                                                                                                                                                                                                                                                                                                                                                                                                                                                                                                                                                                                                                                                                                                                                                                                                                                                                                                                                                                                                                                                                                                                                                                                                                                                                                                                                                                                                                                                                                                                                                                                                                                                                                                                                                                                                                                                                                                                                                                                                                                                                                                                                                                                                                                                                                                                                                                                                                                                                                                                                                                                                                                                                                                                                                                                                                                                                                                                                                                                                                                                                                                                                                                                                                                                                                                                                                                                                                                                                                                                                                                                                                                                                                                                                                                                                                                                                                                                                                                                                                                                                                                                                                                                                                                                                                                                                                                                                                                                                                                                                                                                                                                                                                                                                                                                                                                                                                                                                                                                                                                                                                                                                                                                                                                                                                                                                                                                                                                                                                                                                                                                                                                                                                                                                                                                                                                                                                                                                                                                                                                                                                                                                                                                                                                                                                                                                                                                                                                                                                                            | 0-1                               |            | 0-1        | 0-1        | Major depression |                           |
| Feelings of worth, m7                 | Feelings of worth, m7                                                                                                                | Feelings of worth, m7                                                                                                                              | Feelings of worth, m7                             | Feelings of worth                                                                                                                                                                                                                                                                                                                                                                                                                                                                                                                                                                                                                                                                                                                                                                                                                                                                                                                                                                                                                                                                                                                                                                                                                                                                                                                                                                                                                                                                                                                                                                                                                                                                                                                                                                                                                                                                                                                                                                                                                                                                                                                                                                                                                                                                                                                                                                                                                                                                                                                                                                                                                                                                                                                                                                                                                                                                                                                                                                                                                                                                                                                                                                                                                                                                                                                                                                                                                                                                                                                                                                                                                                                                                                                                                                                                                                                                                                                                                                                                                                                                                                                                                                                                                                                                                                                                                                                                                                                                                                                                                                                                                                                                                                                                                                                                                                                                                                                                                                                                                                                                                                                                                                                                                                                                                                                                                                                                                                                                                                                                                                                                                                                                                                                                                                                                                                                                                                                                                                                                                                                                                                                                                                                                                                                                                                                                                                                                                                                                                                                                                                                                                                                                                                                                                                                                                                                                                                                                                                                                                                                                                                                                                                                                                                                                                                                                                                                                                                                                                                                                                                                                                                                                                                                                                                                                                                                                                                                                                                                                                                                                                                                                                                                                                                                                                                                                                                                                                                                                                                                                                                                                                                                                                                                                                                                                                                                                                                                                                                                                                                                                                                                                                                                                                                                                                                                                                                                                                                                | 0-1                               |            | 0-1        | 0-1        | Major depression |                           |
|                                       |                                                                                                                                      |                                                                                                                                                    | Information on m7                                 | Information on m7                                                                                                                                                                                                                                                                                                                                                                                                                                                                                                                                                                                                                                                                                                                                                                                                                                                                                                                                                                                                                                                                                                                                                                                                                                                                                                                                                                                                                                                                                                                                                                                                                                                                                                                                                                                                                                                                                                                                                                                                                                                                                                                                                                                                                                                                                                                                                                                                                                                                                                                                                                                                                                                                                                                                                                                                                                                                                                                                                                                                                                                                                                                                                                                                                                                                                                                                                                                                                                                                                                                                                                                                                                                                                                                                                                                                                                                                                                                                                                                                                                                                                                                                                                                                                                                                                                                                                                                                                                                                                                                                                                                                                                                                                                                                                                                                                                                                                                                                                                                                                                                                                                                                                                                                                                                                                                                                                                                                                                                                                                                                                                                                                                                                                                                                                                                                                                                                                                                                                                                                                                                                                                                                                                                                                                                                                                                                                                                                                                                                                                                                                                                                                                                                                                                                                                                                                                                                                                                                                                                                                                                                                                                                                                                                                                                                                                                                                                                                                                                                                                                                                                                                                                                                                                                                                                                                                                                                                                                                                                                                                                                                                                                                                                                                                                                                                                                                                                                                                                                                                                                                                                                                                                                                                                                                                                                                                                                                                                                                                                                                                                                                                                                                                                                                                                                                                                                                                                                                                                                | 0-1                               |            | 0-1        | 0-1        | Major depression |                           |
|                                       |                                                                                                                                      |                                                                                                                                                    | Information on m1, m2, m3, m4, m5, m6, m7         | Information on m1, m2, m3, m4, m5, m6, m7                                                                                                                                                                                                                                                                                                                                                                                                                                                                                                                                                                                                                                                                                                                                                                                                                                                                                                                                                                                                                                                                                                                                                                                                                                                                                                                                                                                                                                                                                                                                                                                                                                                                                                                                                                                                                                                                                                                                                                                                                                                                                                                                                                                                                                                                                                                                                                                                                                                                                                                                                                                                                                                                                                                                                                                                                                                                                                                                                                                                                                                                                                                                                                                                                                                                                                                                                                                                                                                                                                                                                                                                                                                                                                                                                                                                                                                                                                                                                                                                                                                                                                                                                                                                                                                                                                                                                                                                                                                                                                                                                                                                                                                                                                                                                                                                                                                                                                                                                                                                                                                                                                                                                                                                                                                                                                                                                                                                                                                                                                                                                                                                                                                                                                                                                                                                                                                                                                                                                                                                                                                                                                                                                                                                                                                                                                                                                                                                                                                                                                                                                                                                                                                                                                                                                                                                                                                                                                                                                                                                                                                                                                                                                                                                                                                                                                                                                                                                                                                                                                                                                                                                                                                                                                                                                                                                                                                                                                                                                                                                                                                                                                                                                                                                                                                                                                                                                                                                                                                                                                                                                                                                                                                                                                                                                                                                                                                                                                                                                                                                                                                                                                                                                                                                                                                                                                                                                                                                                        | 0-1                               |            | 0-1        | 0-1        | Major depression |                           |
| Disrupted or not, m8                  | Disrupted or not, m8                                                                                                                 | Disrupted or not, m8                                                                                                                               | Disrupted or not, m8                              | Disrupted or not                                                                                                                                                                                                                                                                                                                                                                                                                                                                                                                                                                                                                                                                                                                                                                                                                                                                                                                                                                                                                                                                                                                                                                                                                                                                                                                                                                                                                                                                                                                                                                                                                                                                                                                                                                                                                                                                                                                                                                                                                                                                                                                                                                                                                                                                                                                                                                                                                                                                                                                                                                                                                                                                                                                                                                                                                                                                                                                                                                                                                                                                                                                                                                                                                                                                                                                                                                                                                                                                                                                                                                                                                                                                                                                                                                                                                                                                                                                                                                                                                                                                                                                                                                                                                                                                                                                                                                                                                                                                                                                                                                                                                                                                                                                                                                                                                                                                                                                                                                                                                                                                                                                                                                                                                                                                                                                                                                                                                                                                                                                                                                                                                                                                                                                                                                                                                                                                                                                                                                                                                                                                                                                                                                                                                                                                                                                                                                                                                                                                                                                                                                                                                                                                                                                                                                                                                                                                                                                                                                                                                                                                                                                                                                                                                                                                                                                                                                                                                                                                                                                                                                                                                                                                                                                                                                                                                                                                                                                                                                                                                                                                                                                                                                                                                                                                                                                                                                                                                                                                                                                                                                                                                                                                                                                                                                                                                                                                                                                                                                                                                                                                                                                                                                                                                                                                                                                                                                                                                                                 | 0-1                               |            | 0-1        | 0-1        | Major depression |                           |
|                                       |                                                                                                                                      |                                                                                                                                                    | Information on m8                                 | Information on m8                                                                                                                                                                                                                                                                                                                                                                                                                                                                                                                                                                                                                                                                                                                                                                                                                                                                                                                                                                                                                                                                                                                                                                                                                                                                                                                                                                                                                                                                                                                                                                                                                                                                                                                                                                                                                                                                                                                                                                                                                                                                                                                                                                                                                                                                                                                                                                                                                                                                                                                                                                                                                                                                                                                                                                                                                                                                                                                                                                                                                                                                                                                                                                                                                                                                                                                                                                                                                                                                                                                                                                                                                                                                                                                                                                                                                                                                                                                                                                                                                                                                                                                                                                                                                                                                                                                                                                                                                                                                                                                                                                                                                                                                                                                                                                                                                                                                                                                                                                                                                                                                                                                                                                                                                                                                                                                                                                                                                                                                                                                                                                                                                                                                                                                                                                                                                                                                                                                                                                                                                                                                                                                                                                                                                                                                                                                                                                                                                                                                                                                                                                                                                                                                                                                                                                                                                                                                                                                                                                                                                                                                                                                                                                                                                                                                                                                                                                                                                                                                                                                                                                                                                                                                                                                                                                                                                                                                                                                                                                                                                                                                                                                                                                                                                                                                                                                                                                                                                                                                                                                                                                                                                                                                                                                                                                                                                                                                                                                                                                                                                                                                                                                                                                                                                                                                                                                                                                                                                                                | 0-1                               |            | 0-1        | 0-1        | Major depression |                           |
|                                       |                                                                                                                                      |                                                                                                                                                    | Information on m1, m2, m3, m4, m5, m6, m7, m8     | Information on m1, m2, m3, m4, m5, m6, m7, m8                                                                                                                                                                                                                                                                                                                                                                                                                                                                                                                                                                                                                                                                                                                                                                                                                                                                                                                                                                                                                                                                                                                                                                                                                                                                                                                                                                                                                                                                                                                                                                                                                                                                                                                                                                                                                                                                                                                                                                                                                                                                                                                                                                                                                                                                                                                                                                                                                                                                                                                                                                                                                                                                                                                                                                                                                                                                                                                                                                                                                                                                                                                                                                                                                                                                                                                                                                                                                                                                                                                                                                                                                                                                                                                                                                                                                                                                                                                                                                                                                                                                                                                                                                                                                                                                                                                                                                                                                                                                                                                                                                                                                                                                                                                                                                                                                                                                                                                                                                                                                                                                                                                                                                                                                                                                                                                                                                                                                                                                                                                                                                                                                                                                                                                                                                                                                                                                                                                                                                                                                                                                                                                                                                                                                                                                                                                                                                                                                                                                                                                                                                                                                                                                                                                                                                                                                                                                                                                                                                                                                                                                                                                                                                                                                                                                                                                                                                                                                                                                                                                                                                                                                                                                                                                                                                                                                                                                                                                                                                                                                                                                                                                                                                                                                                                                                                                                                                                                                                                                                                                                                                                                                                                                                                                                                                                                                                                                                                                                                                                                                                                                                                                                                                                                                                                                                                                                                                                                                    | 0-1                               |            | 0-1        | 0-1        | Major depression |                           |
| Recurrent thoughts, m9                | Information of the minor criteria not required by the major or minor criteria                                                        | Recurrent thoughts, m9                                                                                                                             | Recurrent thoughts, m9                            | Recurrent thoughts                                                                                                                                                                                                                                                                                                                                                                                                                                                                                                                                                                                                                                                                                                                                                                                                                                                                                                                                                                                                                                                                                                                                                                                                                                                                                                                                                                                                                                                                                                                                                                                                                                                                                                                                                                                                                                                                                                                                                                                                                                                                                                                                                                                                                                                                                                                                                                                                                                                                                                                                                                                                                                                                                                                                                                                                                                                                                                                                                                                                                                                                                                                                                                                                                                                                                                                                                                                                                                                                                                                                                                                                                                                                                                                                                                                                                                                                                                                                                                                                                                                                                                                                                                                                                                                                                                                                                                                                                                                                                                                                                                                                                                                                                                                                                                                                                                                                                                                                                                                                                                                                                                                                                                                                                                                                                                                                                                                                                                                                                                                                                                                                                                                                                                                                                                                                                                                                                                                                                                                                                                                                                                                                                                                                                                                                                                                                                                                                                                                                                                                                                                                                                                                                                                                                                                                                                                                                                                                                                                                                                                                                                                                                                                                                                                                                                                                                                                                                                                                                                                                                                                                                                                                                                                                                                                                                                                                                                                                                                                                                                                                                                                                                                                                                                                                                                                                                                                                                                                                                                                                                                                                                                                                                                                                                                                                                                                                                                                                                                                                                                                                                                                                                                                                                                                                                                                                                                                                                                                               | 0-1                               |            | 0-1        | 0-1        | Major depression |                           |
|                                       |                                                                                                                                      |                                                                                                                                                    | Information on m9                                 | Information on m9                                                                                                                                                                                                                                                                                                                                                                                                                                                                                                                                                                                                                                                                                                                                                                                                                                                                                                                                                                                                                                                                                                                                                                                                                                                                                                                                                                                                                                                                                                                                                                                                                                                                                                                                                                                                                                                                                                                                                                                                                                                                                                                                                                                                                                                                                                                                                                                                                                                                                                                                                                                                                                                                                                                                                                                                                                                                                                                                                                                                                                                                                                                                                                                                                                                                                                                                                                                                                                                                                                                                                                                                                                                                                                                                                                                                                                                                                                                                                                                                                                                                                                                                                                                                                                                                                                                                                                                                                                                                                                                                                                                                                                                                                                                                                                                                                                                                                                                                                                                                                                                                                                                                                                                                                                                                                                                                                                                                                                                                                                                                                                                                                                                                                                                                                                                                                                                                                                                                                                                                                                                                                                                                                                                                                                                                                                                                                                                                                                                                                                                                                                                                                                                                                                                                                                                                                                                                                                                                                                                                                                                                                                                                                                                                                                                                                                                                                                                                                                                                                                                                                                                                                                                                                                                                                                                                                                                                                                                                                                                                                                                                                                                                                                                                                                                                                                                                                                                                                                                                                                                                                                                                                                                                                                                                                                                                                                                                                                                                                                                                                                                                                                                                                                                                                                                                                                                                                                                                                                                | 0-1                               |            | 0-1        | 0-1        | Major depression |                           |
|                                       |                                                                                                                                      |                                                                                                                                                    | Information on m1, m2, m3, m4, m5, m6, m7, m8, m9 | Information on m1, m2, m3, m4, m5, m6, m7, m8, m9                                                                                                                                                                                                                                                                                                                                                                                                                                                                                                                                                                                                                                                                                                                                                                                                                                                                                                                                                                                                                                                                                                                                                                                                                                                                                                                                                                                                                                                                                                                                                                                                                                                                                                                                                                                                                                                                                                                                                                                                                                                                                                                                                                                                                                                                                                                                                                                                                                                                                                                                                                                                                                                                                                                                                                                                                                                                                                                                                                                                                                                                                                                                                                                                                                                                                                                                                                                                                                                                                                                                                                                                                                                                                                                                                                                                                                                                                                                                                                                                                                                                                                                                                                                                                                                                                                                                                                                                                                                                                                                                                                                                                                                                                                                                                                                                                                                                                                                                                                                                                                                                                                                                                                                                                                                                                                                                                                                                                                                                                                                                                                                                                                                                                                                                                                                                                                                                                                                                                                                                                                                                                                                                                                                                                                                                                                                                                                                                                                                                                                                                                                                                                                                                                                                                                                                                                                                                                                                                                                                                                                                                                                                                                                                                                                                                                                                                                                                                                                                                                                                                                                                                                                                                                                                                                                                                                                                                                                                                                                                                                                                                                                                                                                                                                                                                                                                                                                                                                                                                                                                                                                                                                                                                                                                                                                                                                                                                                                                                                                                                                                                                                                                                                                                                                                                                                                                                                                                                                | 0-1                               |            | 0-1        | 0-1        | Major depression |                           |
| Dysthymia                             | Minor criteria, essential for diagnosis                                                                                              | Depressed mood for the day for more than two years, for at least 2 years.                                                                          | Minor criteria                                    | Depressed mood                                                                                                                                                                                                                                                                                                                                                                                                                                                                                                                                                                                                                                                                                                                                                                                                                                                                                                                                                                                                                                                                                                                                                                                                                                                                                                                                                                                                                                                                                                                                                                                                                                                                                                                                                                                                                                                                                                                                                                                                                                                                                                                                                                                                                                                                                                                                                                                                                                                                                                                                                                                                                                                                                                                                                                                                                                                                                                                                                                                                                                                                                                                                                                                                                                                                                                                                                                                                                                                                                                                                                                                                                                                                                                                                                                                                                                                                                                                                                                                                                                                                                                                                                                                                                                                                                                                                                                                                                                                                                                                                                                                                                                                                                                                                                                                                                                                                                                                                                                                                                                                                                                                                                                                                                                                                                                                                                                                                                                                                                                                                                                                                                                                                                                                                                                                                                                                                                                                                                                                                                                                                                                                                                                                                                                                                                                                                                                                                                                                                                                                                                                                                                                                                                                                                                                                                                                                                                                                                                                                                                                                                                                                                                                                                                                                                                                                                                                                                                                                                                                                                                                                                                                                                                                                                                                                                                                                                                                                                                                                                                                                                                                                                                                                                                                                                                                                                                                                                                                                                                                                                                                                                                                                                                                                                                                                                                                                                                                                                                                                                                                                                                                                                                                                                                                                                                                                                                                                                                                                   | 0-1                               |            | 0-1        | 0-1        | 0-1              | Dysthymia                 |
|                                       | Minor criteria, essential for diagnosis                                                                                              | Four symptoms, m1                                                                                                                                  | Four symptoms, m1                                 | Four symptoms, m1                                                                                                                                                                                                                                                                                                                                                                                                                                                                                                                                                                                                                                                                                                                                                                                                                                                                                                                                                                                                                                                                                                                                                                                                                                                                                                                                                                                                                                                                                                                                                                                                                                                                                                                                                                                                                                                                                                                                                                                                                                                                                                                                                                                                                                                                                                                                                                                                                                                                                                                                                                                                                                                                                                                                                                                                                                                                                                                                                                                                                                                                                                                                                                                                                                                                                                                                                                                                                                                                                                                                                                                                                                                                                                                                                                                                                                                                                                                                                                                                                                                                                                                                                                                                                                                                                                                                                                                                                                                                                                                                                                                                                                                                                                                                                                                                                                                                                                                                                                                                                                                                                                                                                                                                                                                                                                                                                                                                                                                                                                                                                                                                                                                                                                                                                                                                                                                                                                                                                                                                                                                                                                                                                                                                                                                                                                                                                                                                                                                                                                                                                                                                                                                                                                                                                                                                                                                                                                                                                                                                                                                                                                                                                                                                                                                                                                                                                                                                                                                                                                                                                                                                                                                                                                                                                                                                                                                                                                                                                                                                                                                                                                                                                                                                                                                                                                                                                                                                                                                                                                                                                                                                                                                                                                                                                                                                                                                                                                                                                                                                                                                                                                                                                                                                                                                                                                                                                                                                                                                | Four symptoms                     | 0-1        |            | 0-1        | 0-1              | Dysthymia                 |
|                                       |                                                                                                                                      |                                                                                                                                                    |                                                   | Information on m1                                                                                                                                                                                                                                                                                                                                                                                                                                                                                                                                                                                                                                                                                                                                                                                                                                                                                                                                                                                                                                                                                                                                                                                                                                                                                                                                                                                                                                                                                                                                                                                                                                                                                                                                                                                                                                                                                                                                                                                                                                                                                                                                                                                                                                                                                                                                                                                                                                                                                                                                                                                                                                                                                                                                                                                                                                                                                                                                                                                                                                                                                                                                                                                                                                                                                                                                                                                                                                                                                                                                                                                                                                                                                                                                                                                                                                                                                                                                                                                                                                                                                                                                                                                                                                                                                                                                                                                                                                                                                                                                                                                                                                                                                                                                                                                                                                                                                                                                                                                                                                                                                                                                                                                                                                                                                                                                                                                                                                                                                                                                                                                                                                                                                                                                                                                                                                                                                                                                                                                                                                                                                                                                                                                                                                                                                                                                                                                                                                                                                                                                                                                                                                                                                                                                                                                                                                                                                                                                                                                                                                                                                                                                                                                                                                                                                                                                                                                                                                                                                                                                                                                                                                                                                                                                                                                                                                                                                                                                                                                                                                                                                                                                                                                                                                                                                                                                                                                                                                                                                                                                                                                                                                                                                                                                                                                                                                                                                                                                                                                                                                                                                                                                                                                                                                                                                                                                                                                                                                                | Information on m1                 | 0-1        |            | 0-1        | 0-1              | Dysthymia                 |
|                                       |                                                                                                                                      |                                                                                                                                                    |                                                   | Information on m1, m2, m3, m4                                                                                                                                                                                                                                                                                                                                                                                                                                                                                                                                                                                                                                                                                                                                                                                                                                                                                                                                                                                                                                                                                                                                                                                                                                                                                                                                                                                                                                                                                                                                                                                                                                                                                                                                                                                                                                                                                                                                                                                                                                                                                                                                                                                                                                                                                                                                                                                                                                                                                                                                                                                                                                                                                                                                                                                                                                                                                                                                                                                                                                                                                                                                                                                                                                                                                                                                                                                                                                                                                                                                                                                                                                                                                                                                                                                                                                                                                                                                                                                                                                                                                                                                                                                                                                                                                                                                                                                                                                                                                                                                                                                                                                                                                                                                                                                                                                                                                                                                                                                                                                                                                                                                                                                                                                                                                                                                                                                                                                                                                                                                                                                                                                                                                                                                                                                                                                                                                                                                                                                                                                                                                                                                                                                                                                                                                                                                                                                                                                                                                                                                                                                                                                                                                                                                                                                                                                                                                                                                                                                                                                                                                                                                                                                                                                                                                                                                                                                                                                                                                                                                                                                                                                                                                                                                                                                                                                                                                                                                                                                                                                                                                                                                                                                                                                                                                                                                                                                                                                                                                                                                                                                                                                                                                                                                                                                                                                                                                                                                                                                                                                                                                                                                                                                                                                                                                                                                                                                                                                    | Information on m1, m2, m3, m4     | 0-1        |            | 0-1        | 0-1              | Dysthymia                 |
|                                       | Insomnia or tired, m2                                                                                                                | Insomnia or tired, m2                                                                                                                              | Insomnia or tired, m2                             | Insomnia or tired, m2                                                                                                                                                                                                                                                                                                                                                                                                                                                                                                                                                                                                                                                                                                                                                                                                                                                                                                                                                                                                                                                                                                                                                                                                                                                                                                                                                                                                                                                                                                                                                                                                                                                                                                                                                                                                                                                                                                                                                                                                                                                                                                                                                                                                                                                                                                                                                                                                                                                                                                                                                                                                                                                                                                                                                                                                                                                                                                                                                                                                                                                                                                                                                                                                                                                                                                                                                                                                                                                                                                                                                                                                                                                                                                                                                                                                                                                                                                                                                                                                                                                                                                                                                                                                                                                                                                                                                                                                                                                                                                                                                                                                                                                                                                                                                                                                                                                                                                                                                                                                                                                                                                                                                                                                                                                                                                                                                                                                                                                                                                                                                                                                                                                                                                                                                                                                                                                                                                                                                                                                                                                                                                                                                                                                                                                                                                                                                                                                                                                                                                                                                                                                                                                                                                                                                                                                                                                                                                                                                                                                                                                                                                                                                                                                                                                                                                                                                                                                                                                                                                                                                                                                                                                                                                                                                                                                                                                                                                                                                                                                                                                                                                                                                                                                                                                                                                                                                                                                                                                                                                                                                                                                                                                                                                                                                                                                                                                                                                                                                                                                                                                                                                                                                                                                                                                                                                                                                                                                                                            | Insomnia or tired                 | 0-1        |            | 0-1        | 0-1              | Dysthymia                 |
|                                       |                                                                                                                                      |                                                                                                                                                    |                                                   | Information on m2                                                                                                                                                                                                                                                                                                                                                                                                                                                                                                                                                                                                                                                                                                                                                                                                                                                                                                                                                                                                                                                                                                                                                                                                                                                                                                                                                                                                                                                                                                                                                                                                                                                                                                                                                                                                                                                                                                                                                                                                                                                                                                                                                                                                                                                                                                                                                                                                                                                                                                                                                                                                                                                                                                                                                                                                                                                                                                                                                                                                                                                                                                                                                                                                                                                                                                                                                                                                                                                                                                                                                                                                                                                                                                                                                                                                                                                                                                                                                                                                                                                                                                                                                                                                                                                                                                                                                                                                                                                                                                                                                                                                                                                                                                                                                                                                                                                                                                                                                                                                                                                                                                                                                                                                                                                                                                                                                                                                                                                                                                                                                                                                                                                                                                                                                                                                                                                                                                                                                                                                                                                                                                                                                                                                                                                                                                                                                                                                                                                                                                                                                                                                                                                                                                                                                                                                                                                                                                                                                                                                                                                                                                                                                                                                                                                                                                                                                                                                                                                                                                                                                                                                                                                                                                                                                                                                                                                                                                                                                                                                                                                                                                                                                                                                                                                                                                                                                                                                                                                                                                                                                                                                                                                                                                                                                                                                                                                                                                                                                                                                                                                                                                                                                                                                                                                                                                                                                                                                                                                | Information on m2                 | 0-1        |            | 0-1        | 0-1              | Dysthymia                 |
|                                       |                                                                                                                                      |                                                                                                                                                    |                                                   | Information on m1, m2                                                                                                                                                                                                                                                                                                                                                                                                                                                                                                                                                                                                                                                                                                                                                                                                                                                                                                                                                                                                                                                                                                                                                                                                                                                                                                                                                                                                                                                                                                                                                                                                                                                                                                                                                                                                                                                                                                                                                                                                                                                                                                                                                                                                                                                                                                                                                                                                                                                                                                                                                                                                                                                                                                                                                                                                                                                                                                                                                                                                                                                                                                                                                                                                                                                                                                                                                                                                                                                                                                                                                                                                                                                                                                                                                                                                                                                                                                                                                                                                                                                                                                                                                                                                                                                                                                                                                                                                                                                                                                                                                                                                                                                                                                                                                                                                                                                                                                                                                                                                                                                                                                                                                                                                                                                                                                                                                                                                                                                                                                                                                                                                                                                                                                                                                                                                                                                                                                                                                                                                                                                                                                                                                                                                                                                                                                                                                                                                                                                                                                                                                                                                                                                                                                                                                                                                                                                                                                                                                                                                                                                                                                                                                                                                                                                                                                                                                                                                                                                                                                                                                                                                                                                                                                                                                                                                                                                                                                                                                                                                                                                                                                                                                                                                                                                                                                                                                                                                                                                                                                                                                                                                                                                                                                                                                                                                                                                                                                                                                                                                                                                                                                                                                                                                                                                                                                                                                                                                                                            | Information on m1, m2             | 0-1        |            | 0-1        | 0-1              | Dysthymia                 |
|                                       | Low energy, m3                                                                                                                       | Low energy, m3                                                                                                                                     | Low energy, m3                                    | Low energy, m3                                                                                                                                                                                                                                                                                                                                                                                                                                                                                                                                                                                                                                                                                                                                                                                                                                                                                                                                                                                                                                                                                                                                                                                                                                                                                                                                                                                                                                                                                                                                                                                                                                                                                                                                                                                                                                                                                                                                                                                                                                                                                                                                                                                                                                                                                                                                                                                                                                                                                                                                                                                                                                                                                                                                                                                                                                                                                                                                                                                                                                                                                                                                                                                                                                                                                                                                                                                                                                                                                                                                                                                                                                                                                                                                                                                                                                                                                                                                                                                                                                                                                                                                                                                                                                                                                                                                                                                                                                                                                                                                                                                                                                                                                                                                                                                                                                                                                                                                                                                                                                                                                                                                                                                                                                                                                                                                                                                                                                                                                                                                                                                                                                                                                                                                                                                                                                                                                                                                                                                                                                                                                                                                                                                                                                                                                                                                                                                                                                                                                                                                                                                                                                                                                                                                                                                                                                                                                                                                                                                                                                                                                                                                                                                                                                                                                                                                                                                                                                                                                                                                                                                                                                                                                                                                                                                                                                                                                                                                                                                                                                                                                                                                                                                                                                                                                                                                                                                                                                                                                                                                                                                                                                                                                                                                                                                                                                                                                                                                                                                                                                                                                                                                                                                                                                                                                                                                                                                                                                                   | Low energy                        | 0-1        |            | 0-1        | 0-1              | Dysthymia                 |
|                                       |                                                                                                                                      |                                                                                                                                                    |                                                   | Information on m3                                                                                                                                                                                                                                                                                                                                                                                                                                                                                                                                                                                                                                                                                                                                                                                                                                                                                                                                                                                                                                                                                                                                                                                                                                                                                                                                                                                                                                                                                                                                                                                                                                                                                                                                                                                                                                                                                                                                                                                                                                                                                                                                                                                                                                                                                                                                                                                                                                                                                                                                                                                                                                                                                                                                                                                                                                                                                                                                                                                                                                                                                                                                                                                                                                                                                                                                                                                                                                                                                                                                                                                                                                                                                                                                                                                                                                                                                                                                                                                                                                                                                                                                                                                                                                                                                                                                                                                                                                                                                                                                                                                                                                                                                                                                                                                                                                                                                                                                                                                                                                                                                                                                                                                                                                                                                                                                                                                                                                                                                                                                                                                                                                                                                                                                                                                                                                                                                                                                                                                                                                                                                                                                                                                                                                                                                                                                                                                                                                                                                                                                                                                                                                                                                                                                                                                                                                                                                                                                                                                                                                                                                                                                                                                                                                                                                                                                                                                                                                                                                                                                                                                                                                                                                                                                                                                                                                                                                                                                                                                                                                                                                                                                                                                                                                                                                                                                                                                                                                                                                                                                                                                                                                                                                                                                                                                                                                                                                                                                                                                                                                                                                                                                                                                                                                                                                                                                                                                                                                                | Information on m3                 | 0-1        |            | 0-1        | 0-1              | Dysthymia                 |
|                                       |                                                                                                                                      |                                                                                                                                                    |                                                   | Information on m1, m2, m3                                                                                                                                                                                                                                                                                                                                                                                                                                                                                                                                                                                                                                                                                                                                                                                                                                                                                                                                                                                                                                                                                                                                                                                                                                                                                                                                                                                                                                                                                                                                                                                                                                                                                                                                                                                                                                                                                                                                                                                                                                                                                                                                                                                                                                                                                                                                                                                                                                                                                                                                                                                                                                                                                                                                                                                                                                                                                                                                                                                                                                                                                                                                                                                                                                                                                                                                                                                                                                                                                                                                                                                                                                                                                                                                                                                                                                                                                                                                                                                                                                                                                                                                                                                                                                                                                                                                                                                                                                                                                                                                                                                                                                                                                                                                                                                                                                                                                                                                                                                                                                                                                                                                                                                                                                                                                                                                                                                                                                                                                                                                                                                                                                                                                                                                                                                                                                                                                                                                                                                                                                                                                                                                                                                                                                                                                                                                                                                                                                                                                                                                                                                                                                                                                                                                                                                                                                                                                                                                                                                                                                                                                                                                                                                                                                                                                                                                                                                                                                                                                                                                                                                                                                                                                                                                                                                                                                                                                                                                                                                                                                                                                                                                                                                                                                                                                                                                                                                                                                                                                                                                                                                                                                                                                                                                                                                                                                                                                                                                                                                                                                                                                                                                                                                                                                                                                                                                                                                                                                        | Information on m1, m2, m3         | 0-1        |            | 0-1        | 0-1              | Dysthymia                 |
|                                       | Low self-esteem, m4                                                                                                                  | Low self-esteem, m4                                                                                                                                | Low self-esteem, m4                               | Low self-esteem, m4                                                                                                                                                                                                                                                                                                                                                                                                                                                                                                                                                                                                                                                                                                                                                                                                                                                                                                                                                                                                                                                                                                                                                                                                                                                                                                                                                                                                                                                                                                                                                                                                                                                                                                                                                                                                                                                                                                                                                                                                                                                                                                                                                                                                                                                                                                                                                                                                                                                                                                                                                                                                                                                                                                                                                                                                                                                                                                                                                                                                                                                                                                                                                                                                                                                                                                                                                                                                                                                                                                                                                                                                                                                                                                                                                                                                                                                                                                                                                                                                                                                                                                                                                                                                                                                                                                                                                                                                                                                                                                                                                                                                                                                                                                                                                                                                                                                                                                                                                                                                                                                                                                                                                                                                                                                                                                                                                                                                                                                                                                                                                                                                                                                                                                                                                                                                                                                                                                                                                                                                                                                                                                                                                                                                                                                                                                                                                                                                                                                                                                                                                                                                                                                                                                                                                                                                                                                                                                                                                                                                                                                                                                                                                                                                                                                                                                                                                                                                                                                                                                                                                                                                                                                                                                                                                                                                                                                                                                                                                                                                                                                                                                                                                                                                                                                                                                                                                                                                                                                                                                                                                                                                                                                                                                                                                                                                                                                                                                                                                                                                                                                                                                                                                                                                                                                                                                                                                                                                                                              | Low self-esteem                   | 0-1        |            | 0-1        | 0-1              | Dysthymia                 |
|                                       |                                                                                                                                      |                                                                                                                                                    |                                                   | Information on m4                                                                                                                                                                                                                                                                                                                                                                                                                                                                                                                                                                                                                                                                                                                                                                                                                                                                                                                                                                                                                                                                                                                                                                                                                                                                                                                                                                                                                                                                                                                                                                                                                                                                                                                                                                                                                                                                                                                                                                                                                                                                                                                                                                                                                                                                                                                                                                                                                                                                                                                                                                                                                                                                                                                                                                                                                                                                                                                                                                                                                                                                                                                                                                                                                                                                                                                                                                                                                                                                                                                                                                                                                                                                                                                                                                                                                                                                                                                                                                                                                                                                                                                                                                                                                                                                                                                                                                                                                                                                                                                                                                                                                                                                                                                                                                                                                                                                                                                                                                                                                                                                                                                                                                                                                                                                                                                                                                                                                                                                                                                                                                                                                                                                                                                                                                                                                                                                                                                                                                                                                                                                                                                                                                                                                                                                                                                                                                                                                                                                                                                                                                                                                                                                                                                                                                                                                                                                                                                                                                                                                                                                                                                                                                                                                                                                                                                                                                                                                                                                                                                                                                                                                                                                                                                                                                                                                                                                                                                                                                                                                                                                                                                                                                                                                                                                                                                                                                                                                                                                                                                                                                                                                                                                                                                                                                                                                                                                                                                                                                                                                                                                                                                                                                                                                                                                                                                                                                                                                                                | Information on m4                 | 0-1        |            | 0-1        | 0-1              | Dysthymia                 |
|                                       |                                                                                                                                      |                                                                                                                                                    |                                                   | Information on m1, m2, m3, m4                                                                                                                                                                                                                                                                                                                                                                                                                                                                                                                                                                                                                                                                                                                                                                                                                                                                                                                                                                                                                                                                                                                                                                                                                                                                                                                                                                                                                                                                                                                                                                                                                                                                                                                                                                                                                                                                                                                                                                                                                                                                                                                                                                                                                                                                                                                                                                                                                                                                                                                                                                                                                                                                                                                                                                                                                                                                                                                                                                                                                                                                                                                                                                                                                                                                                                                                                                                                                                                                                                                                                                                                                                                                                                                                                                                                                                                                                                                                                                                                                                                                                                                                                                                                                                                                                                                                                                                                                                                                                                                                                                                                                                                                                                                                                                                                                                                                                                                                                                                                                                                                                                                                                                                                                                                                                                                                                                                                                                                                                                                                                                                                                                                                                                                                                                                                                                                                                                                                                                                                                                                                                                                                                                                                                                                                                                                                                                                                                                                                                                                                                                                                                                                                                                                                                                                                                                                                                                                                                                                                                                                                                                                                                                                                                                                                                                                                                                                                                                                                                                                                                                                                                                                                                                                                                                                                                                                                                                                                                                                                                                                                                                                                                                                                                                                                                                                                                                                                                                                                                                                                                                                                                                                                                                                                                                                                                                                                                                                                                                                                                                                                                                                                                                                                                                                                                                                                                                                                                                    | Information on m1, m2, m3, m4     | 0-1        |            | 0-1        | 0-1              | Dysthymia                 |
|                                       | Poor concentration, m5                                                                                                               | Poor concentration, m5                                                                                                                             | Poor concentration, m5                            | Poor concentration, m5                                                                                                                                                                                                                                                                                                                                                                                                                                                                                                                                                                                                                                                                                                                                                                                                                                                                                                                                                                                                                                                                                                                                                                                                                                                                                                                                                                                                                                                                                                                                                                                                                                                                                                                                                                                                                                                                                                                                                                                                                                                                                                                                                                                                                                                                                                                                                                                                                                                                                                                                                                                                                                                                                                                                                                                                                                                                                                                                                                                                                                                                                                                                                                                                                                                                                                                                                                                                                                                                                                                                                                                                                                                                                                                                                                                                                                                                                                                                                                                                                                                                                                                                                                                                                                                                                                                                                                                                                                                                                                                                                                                                                                                                                                                                                                                                                                                                                                                                                                                                                                                                                                                                                                                                                                                                                                                                                                                                                                                                                                                                                                                                                                                                                                                                                                                                                                                                                                                                                                                                                                                                                                                                                                                                                                                                                                                                                                                                                                                                                                                                                                                                                                                                                                                                                                                                                                                                                                                                                                                                                                                                                                                                                                                                                                                                                                                                                                                                                                                                                                                                                                                                                                                                                                                                                                                                                                                                                                                                                                                                                                                                                                                                                                                                                                                                                                                                                                                                                                                                                                                                                                                                                                                                                                                                                                                                                                                                                                                                                                                                                                                                                                                                                                                                                                                                                                                                                                                                                                           | Poor concentration                | 0-1        |            | 0-1        | 0-1              | Dysthymia                 |
|                                       |                                                                                                                                      |                                                                                                                                                    |                                                   | Information on m5                                                                                                                                                                                                                                                                                                                                                                                                                                                                                                                                                                                                                                                                                                                                                                                                                                                                                                                                                                                                                                                                                                                                                                                                                                                                                                                                                                                                                                                                                                                                                                                                                                                                                                                                                                                                                                                                                                                                                                                                                                                                                                                                                                                                                                                                                                                                                                                                                                                                                                                                                                                                                                                                                                                                                                                                                                                                                                                                                                                                                                                                                                                                                                                                                                                                                                                                                                                                                                                                                                                                                                                                                                                                                                                                                                                                                                                                                                                                                                                                                                                                                                                                                                                                                                                                                                                                                                                                                                                                                                                                                                                                                                                                                                                                                                                                                                                                                                                                                                                                                                                                                                                                                                                                                                                                                                                                                                                                                                                                                                                                                                                                                                                                                                                                                                                                                                                                                                                                                                                                                                                                                                                                                                                                                                                                                                                                                                                                                                                                                                                                                                                                                                                                                                                                                                                                                                                                                                                                                                                                                                                                                                                                                                                                                                                                                                                                                                                                                                                                                                                                                                                                                                                                                                                                                                                                                                                                                                                                                                                                                                                                                                                                                                                                                                                                                                                                                                                                                                                                                                                                                                                                                                                                                                                                                                                                                                                                                                                                                                                                                                                                                                                                                                                                                                                                                                                                                                                                                                                | Information on m5                 | 0-1        |            | 0-1        | 0-1              | Dysthymia                 |
| Information on m1, m2, m3, m4, m5     |                                                                                                                                      |                                                                                                                                                    |                                                   | Information on m1, m2, m3, m4, m5                                                                                                                                                                                                                                                                                                                                                                                                                                                                                                                                                                                                                                                                                                                                                                                                                                                                                                                                                                                                                                                                                                                                                                                                                                                                                                                                                                                                                                                                                                                                                                                                                                                                                                                                                                                                                                                                                                                                                                                                                                                                                                                                                                                                                                                                                                                                                                                                                                                                                                                                                                                                                                                                                                                                                                                                                                                                                                                                                                                                                                                                                                                                                                                                                                                                                                                                                                                                                                                                                                                                                                                                                                                                                                                                                                                                                                                                                                                                                                                                                                                                                                                                                                                                                                                                                                                                                                                                                                                                                                                                                                                                                                                                                                                                                                                                                                                                                                                                                                                                                                                                                                                                                                                                                                                                                                                                                                                                                                                                                                                                                                                                                                                                                                                                                                                                                                                                                                                                                                                                                                                                                                                                                                                                                                                                                                                                                                                                                                                                                                                                                                                                                                                                                                                                                                                                                                                                                                                                                                                                                                                                                                                                                                                                                                                                                                                                                                                                                                                                                                                                                                                                                                                                                                                                                                                                                                                                                                                                                                                                                                                                                                                                                                                                                                                                                                                                                                                                                                                                                                                                                                                                                                                                                                                                                                                                                                                                                                                                                                                                                                                                                                                                                                                                                                                                                                                                                                                                                                | 0-1                               |            | 0-1        | 0-1        | Dysthymia        |                           |
| Feelings of help, m6                  | Feelings of help, m6                                                                                                                 | Feelings of help, m6                                                                                                                               | Feelings of help, m6                              | Feelings of help                                                                                                                                                                                                                                                                                                                                                                                                                                                                                                                                                                                                                                                                                                                                                                                                                                                                                                                                                                                                                                                                                                                                                                                                                                                                                                                                                                                                                                                                                                                                                                                                                                                                                                                                                                                                                                                                                                                                                                                                                                                                                                                                                                                                                                                                                                                                                                                                                                                                                                                                                                                                                                                                                                                                                                                                                                                                                                                                                                                                                                                                                                                                                                                                                                                                                                                                                                                                                                                                                                                                                                                                                                                                                                                                                                                                                                                                                                                                                                                                                                                                                                                                                                                                                                                                                                                                                                                                                                                                                                                                                                                                                                                                                                                                                                                                                                                                                                                                                                                                                                                                                                                                                                                                                                                                                                                                                                                                                                                                                                                                                                                                                                                                                                                                                                                                                                                                                                                                                                                                                                                                                                                                                                                                                                                                                                                                                                                                                                                                                                                                                                                                                                                                                                                                                                                                                                                                                                                                                                                                                                                                                                                                                                                                                                                                                                                                                                                                                                                                                                                                                                                                                                                                                                                                                                                                                                                                                                                                                                                                                                                                                                                                                                                                                                                                                                                                                                                                                                                                                                                                                                                                                                                                                                                                                                                                                                                                                                                                                                                                                                                                                                                                                                                                                                                                                                                                                                                                                                                 | 0-1                               |            | 0-1        | 0-1        | Dysthymia        |                           |
|                                       |                                                                                                                                      |                                                                                                                                                    | Information on m6                                 | Information on m6                                                                                                                                                                                                                                                                                                                                                                                                                                                                                                                                                                                                                                                                                                                                                                                                                                                                                                                                                                                                                                                                                                                                                                                                                                                                                                                                                                                                                                                                                                                                                                                                                                                                                                                                                                                                                                                                                                                                                                                                                                                                                                                                                                                                                                                                                                                                                                                                                                                                                                                                                                                                                                                                                                                                                                                                                                                                                                                                                                                                                                                                                                                                                                                                                                                                                                                                                                                                                                                                                                                                                                                                                                                                                                                                                                                                                                                                                                                                                                                                                                                                                                                                                                                                                                                                                                                                                                                                                                                                                                                                                                                                                                                                                                                                                                                                                                                                                                                                                                                                                                                                                                                                                                                                                                                                                                                                                                                                                                                                                                                                                                                                                                                                                                                                                                                                                                                                                                                                                                                                                                                                                                                                                                                                                                                                                                                                                                                                                                                                                                                                                                                                                                                                                                                                                                                                                                                                                                                                                                                                                                                                                                                                                                                                                                                                                                                                                                                                                                                                                                                                                                                                                                                                                                                                                                                                                                                                                                                                                                                                                                                                                                                                                                                                                                                                                                                                                                                                                                                                                                                                                                                                                                                                                                                                                                                                                                                                                                                                                                                                                                                                                                                                                                                                                                                                                                                                                                                                                                                | 0-1                               |            | 0-1        | 0-1        | Dysthymia        |                           |
|                                       |                                                                                                                                      |                                                                                                                                                    | Information on m1, m2, m3, m4, m5, m6             | Information on m1, m2, m3, m4, m5, m6                                                                                                                                                                                                                                                                                                                                                                                                                                                                                                                                                                                                                                                                                                                                                                                                                                                                                                                                                                                                                                                                                                                                                                                                                                                                                                                                                                                                                                                                                                                                                                                                                                                                                                                                                                                                                                                                                                                                                                                                                                                                                                                                                                                                                                                                                                                                                                                                                                                                                                                                                                                                                                                                                                                                                                                                                                                                                                                                                                                                                                                                                                                                                                                                                                                                                                                                                                                                                                                                                                                                                                                                                                                                                                                                                                                                                                                                                                                                                                                                                                                                                                                                                                                                                                                                                                                                                                                                                                                                                                                                                                                                                                                                                                                                                                                                                                                                                                                                                                                                                                                                                                                                                                                                                                                                                                                                                                                                                                                                                                                                                                                                                                                                                                                                                                                                                                                                                                                                                                                                                                                                                                                                                                                                                                                                                                                                                                                                                                                                                                                                                                                                                                                                                                                                                                                                                                                                                                                                                                                                                                                                                                                                                                                                                                                                                                                                                                                                                                                                                                                                                                                                                                                                                                                                                                                                                                                                                                                                                                                                                                                                                                                                                                                                                                                                                                                                                                                                                                                                                                                                                                                                                                                                                                                                                                                                                                                                                                                                                                                                                                                                                                                                                                                                                                                                                                                                                                                                                            | 0-1                               |            | 0-1        | 0-1        | Dysthymia        |                           |
| Major episodes                        | Minor criteria, essential for the diagnosis of a manic episode (more than one bipolar episode required to diagnose bipolar disorder) | Manic episode                                                                                                                                      | Manic episode                                     | 0-1                                                                                                                                                                                                                                                                                                                                                                                                                                                                                                                                                                                                                                                                                                                                                                                                                                                                                                                                                                                                                                                                                                                                                                                                                                                                                                                                                                                                                                                                                                                                                                                                                                                                                                                                                                                                                                                                                                                                                                                                                                                                                                                                                                                                                                                                                                                                                                                                                                                                                                                                                                                                                                                                                                                                                                                                                                                                                                                                                                                                                                                                                                                                                                                                                                                                                                                                                                                                                                                                                                                                                                                                                                                                                                                                                                                                                                                                                                                                                                                                                                                                                                                                                                                                                                                                                                                                                                                                                                                                                                                                                                                                                                                                                                                                                                                                                                                                                                                                                                                                                                                                                                                                                                                                                                                                                                                                                                                                                                                                                                                                                                                                                                                                                                                                                                                                                                                                                                                                                                                                                                                                                                                                                                                                                                                                                                                                                                                                                                                                                                                                                                                                                                                                                                                                                                                                                                                                                                                                                                                                                                                                                                                                                                                                                                                                                                                                                                                                                                                                                                                                                                                                                                                                                                                                                                                                                                                                                                                                                                                                                                                                                                                                                                                                                                                                                                                                                                                                                                                                                                                                                                                                                                                                                                                                                                                                                                                                                                                                                                                                                                                                                                                                                                                                                                                                                                                                                                                                                                                              |                                   | 0-1        | 0-1        | 0-1        | Manic episode    |                           |
|                                       | Minor criteria, essential for the diagnosis of a manic episode (more than one bipolar episode required to diagnose bipolar disorder) | A distinct period of abnormally and persistently elevated, expansive, or irritable mood, lasting at least 7 days (or any duration if hospitalised) | Elevated mood, m1                                 | Elevated mood, m1                                                                                                                                                                                                                                                                                                                                                                                                                                                                                                                                                                                                                                                                                                                                                                                                                                                                                                                                                                                                                                                                                                                                                                                                                                                                                                                                                                                                                                                                                                                                                                                                                                                                                                                                                                                                                                                                                                                                                                                                                                                                                                                                                                                                                                                                                                                                                                                                                                                                                                                                                                                                                                                                                                                                                                                                                                                                                                                                                                                                                                                                                                                                                                                                                                                                                                                                                                                                                                                                                                                                                                                                                                                                                                                                                                                                                                                                                                                                                                                                                                                                                                                                                                                                                                                                                                                                                                                                                                                                                                                                                                                                                                                                                                                                                                                                                                                                                                                                                                                                                                                                                                                                                                                                                                                                                                                                                                                                                                                                                                                                                                                                                                                                                                                                                                                                                                                                                                                                                                                                                                                                                                                                                                                                                                                                                                                                                                                                                                                                                                                                                                                                                                                                                                                                                                                                                                                                                                                                                                                                                                                                                                                                                                                                                                                                                                                                                                                                                                                                                                                                                                                                                                                                                                                                                                                                                                                                                                                                                                                                                                                                                                                                                                                                                                                                                                                                                                                                                                                                                                                                                                                                                                                                                                                                                                                                                                                                                                                                                                                                                                                                                                                                                                                                                                                                                                                                                                                                                                                | Elevated mood                     | 0-1        |            | 0-1        | 0-1              | Manic episode             |
|                                       |                                                                                                                                      |                                                                                                                                                    |                                                   | Information on m1                                                                                                                                                                                                                                                                                                                                                                                                                                                                                                                                                                                                                                                                                                                                                                                                                                                                                                                                                                                                                                                                                                                                                                                                                                                                                                                                                                                                                                                                                                                                                                                                                                                                                                                                                                                                                                                                                                                                                                                                                                                                                                                                                                                                                                                                                                                                                                                                                                                                                                                                                                                                                                                                                                                                                                                                                                                                                                                                                                                                                                                                                                                                                                                                                                                                                                                                                                                                                                                                                                                                                                                                                                                                                                                                                                                                                                                                                                                                                                                                                                                                                                                                                                                                                                                                                                                                                                                                                                                                                                                                                                                                                                                                                                                                                                                                                                                                                                                                                                                                                                                                                                                                                                                                                                                                                                                                                                                                                                                                                                                                                                                                                                                                                                                                                                                                                                                                                                                                                                                                                                                                                                                                                                                                                                                                                                                                                                                                                                                                                                                                                                                                                                                                                                                                                                                                                                                                                                                                                                                                                                                                                                                                                                                                                                                                                                                                                                                                                                                                                                                                                                                                                                                                                                                                                                                                                                                                                                                                                                                                                                                                                                                                                                                                                                                                                                                                                                                                                                                                                                                                                                                                                                                                                                                                                                                                                                                                                                                                                                                                                                                                                                                                                                                                                                                                                                                                                                                                                                                | Information on m1                 | 0-1        |            | 0-1        | 0-1              | Manic episode             |
|                                       |                                                                                                                                      |                                                                                                                                                    |                                                   | Information on m1, m2, m3, m4, m5, m6, m7, m8, m9, m10, m11, m12, m13, m14, m15, m16, m17, m18, m19, m20, m21, m22, m23, m24, m25, m26, m27, m28, m29, m30, m31, m32, m33, m34, m35, m36, m37, m38, m39, m40, m41, m42, m43, m44, m45, m46, m47, m48, m49, m50, m51, m52, m53, m54, m55, m56, m57, m58, m59, m60, m61, m62, m63, m64, m65, m66, m67, m68, m69, m70, m71, m72, m73, m74, m75, m76, m77, m78, m79, m80, m81, m82, m83, m84, m85, m86, m87, m88, m89, m90, m91, m92, m93, m94, m95, m96, m97, m98, m99, m100, m101, m102, m103, m104, m105, m106, m107, m108, m109, m110, m111, m112, m113, m114, m115, m116, m117, m118, m119, m120, m121, m122, m123, m124, m125, m126, m127, m128, m129, m130, m131, m132, m133, m134, m135, m136, m137, m138, m139, m140, m141, m142, m143, m144, m145, m146, m147, m148, m149, m150, m151, m152, m153, m154, m155, m156, m157, m158, m159, m160, m161, m162, m163, m164, m165, m166, m167, m168, m169, m170, m171, m172, m173, m174, m175, m176, m177, m178, m179, m180, m181, m182, m183, m184, m185, m186, m187, m188, m189, m190, m191, m192, m193, m194, m195, m196, m197, m198, m199, m200, m201, m202, m203, m204, m205, m206, m207, m208, m209, m210, m211, m212, m213, m214, m215, m216, m217, m218, m219, m220, m221, m222, m223, m224, m225, m226, m227, m228, m229, m230, m231, m232, m233, m234, m235, m236, m237, m238, m239, m240, m241, m242, m243, m244, m245, m246, m247, m248, m249, m250, m251, m252, m253, m254, m255, m256, m257, m258, m259, m260, m261, m262, m263, m264, m265, m266, m267, m268, m269, m270, m271, m272, m273, m274, m275, m276, m277, m278, m279, m280, m281, m282, m283, m284, m285, m286, m287, m288, m289, m290, m291, m292, m293, m294, m295, m296, m297, m298, m299, m300, m301, m302, m303, m304, m305, m306, m307, m308, m309, m310, m311, m312, m313, m314, m315, m316, m317, m318, m319, m320, m321, m322, m323, m324, m325, m326, m327, m328, m329, m330, m331, m332, m333, m334, m335, m336, m337, m338, m339, m340, m341, m342, m343, m344, m345, m346, m347, m348, m349, m350, m351, m352, m353, m354, m355, m356, m357, m358, m359, m360, m361, m362, m363, m364, m365, m366, m367, m368, m369, m370, m371, m372, m373, m374, m375, m376, m377, m378, m379, m380, m381, m382, m383, m384, m385, m386, m387, m388, m389, m390, m391, m392, m393, m394, m395, m396, m397, m398, m399, m400, m401, m402, m403, m404, m405, m406, m407, m408, m409, m410, m411, m412, m413, m414, m415, m416, m417, m418, m419, m420, m421, m422, m423, m424, m425, m426, m427, m428, m429, m430, m431, m432, m433, m434, m435, m436, m437, m438, m439, m440, m441, m442, m443, m444, m445, m446, m447, m448, m449, m450, m451, m452, m453, m454, m455, m456, m457, m458, m459, m460, m461, m462, m463, m464, m465, m466, m467, m468, m469, m470, m471, m472, m473, m474, m475, m476, m477, m478, m479, m480, m481, m482, m483, m484, m485, m486, m487, m488, m489, m490, m491, m492, m493, m494, m495, m496, m497, m498, m499, m500, m501, m502, m503, m504, m505, m506, m507, m508, m509, m510, m511, m512, m513, m514, m515, m516, m517, m518, m519, m520, m521, m522, m523, m524, m525, m526, m527, m528, m529, m530, m531, m532, m533, m534, m535, m536, m537, m538, m539, m540, m541, m542, m543, m544, m545, m546, m547, m548, m549, m550, m551, m552, m553, m554, m555, m556, m557, m558, m559, m560, m561, m562, m563, m564, m565, m566, m567, m568, m569, m570, m571, m572, m573, m574, m575, m576, m577, m578, m579, m580, m581, m582, m583, m584, m585, m586, m587, m588, m589, m590, m591, m592, m593, m594, m595, m596, m597, m598, m599, m600, m601, m602, m603, m604, m605, m606, m607, m608, m609, m610, m611, m612, m613, m614, m615, m616, m617, m618, m619, m620, m621, m622, m623, m624, m625, m626, m627, m628, m629, m630, m631, m632, m633, m634, m635, m636, m637, m638, m639, m640, m641, m642, m643, m644, m645, m646, m647, m648, m649, m650, m651, m652, m653, m654, m655, m656, m657, m658, m659, m660, m661, m662, m663, m664, m665, m666, m667, m668, m669, m670, m671, m672, m673, m674, m675, m676, m677, m678, m679, m680, m681, m682, m683, m684, m685, m686, m687, m688, m689, m690, m691, m692, m693, m694, m695, m696, m697, m698, m699, m700, m701, m702, m703, m704, m705, m706, m707, m708, m709, m710, m711, m712, m713, m714, m715, m716, m717, m718, m719, m720, m721, m722, m723, m724, m725, m726, m727, m728, m729, m730, m731, m732, m733, m734, m735, m736, m737, m738, m739, m740, m741, m742, m743, m744, m745, m746, m747, m748, m749, m750, m751, m752, m753, m754, m755, m756, m757, m758, m759, m760, m761, m762, m763, m764, m765, m766, m767, m768, m769, m770, m771, m772, m773, m774, m775, m776, m777, m778, m779, m780, m781, m782, m783, m784, m785, m786, m787, m788, m789, m790, m791, m792, m793, m794, m795, m796, m797, m798, m799, m800, m801, m802, m803, m804, m805, m806, m807, m808, m809, m810, m811, m812, m813, m814, m815, m816, m817, m818, m819, m820, m821, m822, m823, m824, m825, m826, m827, m828, m829, m830, m831, m832, m833, m834, m835, m836, m837, m838, m839, m840, m841, m842, m843, m844, m845, m846, m847, m848, m849, m850, m851, m852, m853, m854, m855, m856, m857, m858, m859, m860, m861, m862, m863, m864, m865, m866, m867, m868, m869, m870, m871, m872, m873, m874, m875, m876, m877, m878, m879, m880, m881, m882, m883, m884, m885, m886, m887, m888, m889, m890, m891, m892, m893, m894, m895, m896, m897, m898, m899, m900, m901, m902, m903, m904, m905, m906, m907, m908, m909, m910, m911, m912, m913, m914, m915, m916, m917, m918, m919, m920, m921, m922, m923, m924, m925, m926, m927, m928, m929, m930, m931, m932, m933, m934, m935, m936, m937, m938, m939, m940, m941, m942, m943, m944, m945, m946, m947, m948, m949, m950, m951, m952, m953, m954, m955, m956, m957, m958, m959, m960, m961, m962, m963, m964, m965, m966, m967, m968, m969, m970, m971, m972, m973, m974, m975, m976, m977, m978, m979, m980, m981, m982, m983, m984, m985, m986, m987, m988, m989, m990, m991, m992, m993, m994, m995, m996, m997, m998, m999, m1000, m1001, m1002, m1003, m1004, m1005, m1006, m1007, m1008, m1009, m1010, m1011, m1012, m1013, m1014, m1015, m1016, m1017, m1018, m1019, m1020, m1021, m1022, m1023, m1024, m1025, m1026, m1027, m1028, m1029, m1030, m1031, m1032, m1033, m1034, m1035, m1036, m1037, m1038, m1039, m1040, m1041, m1042, m1043, m1044, m1045, m1046, m1047, m1048, m1049, m1050, m1051, m1052, m1053, m1054, m1055, m1056, m1057, m1058, m1059, m1060, m1061, m1062, m1063, m1064, m1065, m1066, m1067, m1068, m1069, m1070, m1071, m1072, m1073, m1074, m1075, m1076, m1077, m1078, m1079, m1080, m1081, m1082, m1083, m1084, m1085, m1086, m1087, m1088, m1089, m1090, m1091, m1092, m1093, m1094, m1095, m1096, m1097, m1098, m1099, m1100, m1101, m1102, m1103, m1104, m1105, m1106, m1107, m1108, m1109, m1110, m1111, m1112, m1113, m1114, m1115, m1116, m1117, m1118, m1119, m1120, m1121, m1122, m1123, m1124, m1125, m1126, m1127, m1128, m1129, m1130, m1131, m1132, m1133, m1134, m1135, m1136, m1137, m1138, m1139, m1140, m1141, m1142, m1143, m1144, m1145, m1146, m1147, m1148, m1149, m1150, m1151, m1152, m1153, m1154, m1155, m1156, m1157, m1158, m1159, m1160, m1161, m1162, m1163, m1164, m1165, m1166, m1167, m1168, m1169, m1170, m1171, m1172, m1173, m1174, m1175, m1176, m1177, m1178, m1179, m1180, m1181, m1182, m1183, m1184, m1185, m1186, m1187, m1188, m1189, m1190, m1191, m1192, m1193, m1194, m1195, m1196, m1197, m1198, m1199, m1200, m1201, m1202, m1203, m1204, m1205, m1206, m1207, m1208, m1209, m1210, m1211, m1212, m1213, m1214, m1215, m1216, m1217, m1218, m1219, m1220, m1221, m1222, m1223, m1224, m1225, m1226, m1227, m1228, m1229, m1230, m1231, m1232, m1233, m1234, m1235, m1236, m1237, m1238, m1239, m1240, m1241, m1242, m1243, m1244, m1245, m1246, m1247, m1248, m1249, m1250, m1251, m1252, m1253, m1254, m1255, m1256, m1257, m1258, m1259, m1260, m1261, m1262, m1263, m1264, m1265, m1266, m1267, m1268, m1269, m1270, m1271, m1272, m1273, m1274, m1275, m1276, m1277, m1278, m1279, m1280, m1281, m1282, m1283, m1284, m1285, m1286, m1287, m1288, m1289, m1290, m1291, m1292, m1293, m1294, m1295, m1296, m1297, m1298, m1299, m1300, m1301, m1302, m1303, m1304, m1305, m1306, m1307, m1308, m1309, m1310, m1311, m1312, m1313, m1314, m1315, m1316, m1317, m1318, m1319, m1320, m1321, m1322, m1323, m1324, m1325, m1326, m1327, m1328, m1329, m1330, m1331, m1332, m1333, m1334, m1335, m1336, m1337, m1338, m1339, m1340, m1341, m1342, m1343, m1344, m1345, m1346, m1347, m1348, m1349, m1350, m1351, m1352, m1353, m1354, m1355, m1356, m1357, m1358, m1359, m1360, m1361, m1362, m1363, m1364, m1365, m1366, m1367, m1368, m1369, m1370, m1371, m1372, m1373, m1374, m1375, m1376, m1377, m1378, m1379, m1380, m1381, m1382, m1383, m1384, m1385, m1386, m1387, m1388, m1389, m1390, m1391, m1392, m1393, m1394, m1395, m1396, m1397, m1398, m1399, m1400, m1401, m1402, m1403, m1404, m1405, m1406, m1407, m1408, m1409, m1410, m1411, m1412, m1413, m1414, m1415, m1416, m1417, m1418, m1419, m1420, m1421, m1422, m1423, m1424, m1425, m1426, m1427, m1428, m1429, m1430, m1431, m1432, m1433, m1434, m1435, m1436, m1437, m1438, m1439, m1440, m1441, m1442, m1443, m1444, m1445, m1446, m1447, m1448, m1449, m1450, m1451, m1452, m1453, m1454, m1 |                                   |            |            |            |                  |                           |

```
---
title: "2019_09_06 simulated mental illnesses"
author: "Yi-Sheng Chao"
date: "November 22, 2018"
output: pdf_document
editor_options:
  chunk_output_type: inline
---

##Adding correlations to the random variables

```{r}
library(bindata)

library(openxlsx)
resu = read.xlsx("A simulation study to demonstrate the biases in three
diagnoses of mental illnesses.xlsx", sheet = "Prob 1")
names(resu)
unique(resu$variable)
memory.limit(size = 10^13)
ssize = 10^5
times = 10^2

prevalence = c(0.05, 0.1, 0.3, 0.5, 0.7)
rho = c(0, 0.1, 0.4, 0.7, 0.9)#correlation coefficients of the input
symptoms

collect = c("mean", "max",
"min", "derivedprevalence", "coef", "coefse", "p", "intercept",
"interceptp", "r2", "subcoef", "subcoefse", "subp", "subintercept",
"subinterceptp", "subr2", "appbyownr2", "appbybiasr2", "appbyallr2",
"appbyownvar", "appbybiasvar", "appbyallvar", "appbyownn", "appbybiasn",
"appbyalln")

set.seed(1)

##Create a simulated data set to extract variables
for(preval in 1:length(prevalence)){
  for(rh in 1:length(rho)){

    library(openxlsx)
    resu = read.xlsx("A simulation study to demonstrate the biases in three
diagnoses of mental illnesses.xlsx", sheet = "Prob 1")

    # foreach(c = 1:times) %dopar% {
    for(c in 1:times){

library(bindata)
bindata = as.data.frame(rmvbin(ssize, rep(prevalence[preval], 40),
bincorr=(1 - rho[rh])*diag(40) + rho[rh]))
bindata2 = as.data.frame(rmvbin(ssize, rep(prevalence[preval], 20),
bincorr=(1 - rho[rh])*diag(20) + rho[rh]))

##demographic characteristics
```

```
sim = data.frame(1:ssize)
names(sim) = "id"
sim$female = rbinom(n = ssize, size = 1, prob = 0.51)
sim$age = sample(30:60, ssize, replace = TRUE)
sim$edu = rnorm(ssize, mean = 12, sd = 5)
sim$edu[which(sim$edu <= 0)] = 0
sim$id = NULL

sim$mde_ma1 = bindata[,1]
sim$mde_ma2 = bindata[,2]

sim$mde_mi3_1 = bindata[,3]
sim$mde_mi3_2 = bindata[,4]
sim$mde_mi3 = 1*((sim$mde_mi3_1 + sim$mde_mi3_2) > 0)
sim$mde_mi3_bias = sim$mde_mi3 - sim$mde_mi3_1 - sim$mde_mi3_2

sim$mde_mi4_1 = bindata[,5]
sim$mde_mi4_2 = bindata[,6]
sim$mde_mi4 = 1*((sim$mde_mi4_1 + sim$mde_mi4_2) > 0)
sim$mde_mi4_bias = sim$mde_mi4 - sim$mde_mi4_1 - sim$mde_mi4_2

sim$mde_mi5_1 = bindata[,7]
sim$mde_mi5_2 = bindata[,8]
sim$mde_mi5 = 1*((sim$mde_mi5_1 + sim$mde_mi5_2) > 0)
sim$mde_mi5_bias = sim$mde_mi5 - sim$mde_mi5_1 - sim$mde_mi5_2

sim$mde_mi6_1 = bindata[,9]
sim$mde_mi6_2 = bindata[,10]
sim$mde_mi6 = 1*((sim$mde_mi6_1 + sim$mde_mi6_2) > 0)
sim$mde_mi6_bias = sim$mde_mi6 - sim$mde_mi6_1 - sim$mde_mi6_2

sim$mde_mi7_1 = bindata[,11]
sim$mde_mi7_2 = bindata[,12]
sim$mde_mi7 = 1*((sim$mde_mi7_1 + sim$mde_mi7_2) > 0)
sim$mde_mi7_bias = sim$mde_mi7 - sim$mde_mi7_1 - sim$mde_mi7_2

sim$mde_mi8_1 = bindata[,13]
sim$mde_mi8_2 = bindata[,14]
sim$mde_mi8 = 1*((sim$mde_mi8_1 + sim$mde_mi8_2) > 0)
sim$mde_mi8_bias = sim$mde_mi8 - sim$mde_mi8_1 - sim$mde_mi8_2

sim$mde_mi9 = bindata[,15]

sim$mde_bias1 = 1 * ((sim$mde_mi3 + sim$mde_mi4 + sim$mde_mi5 +
sim$mde_mi6 + sim$mde_mi7 + sim$mde_mi8 + sim$mde_mi9)>2) - (sim$mde_mi3
+ sim$mde_mi4 + sim$mde_mi5 + sim$mde_mi6 + sim$mde_mi7 + sim$mde_mi8 +
sim$mde_mi9)
sim$mde_bias2 = 1 * ((sim$mde_mi3 + sim$mde_mi4 + sim$mde_mi5 +
sim$mde_mi6 + sim$mde_mi7 + sim$mde_mi8 + sim$mde_mi9)>3) - (sim$mde_mi3
+ sim$mde_mi4 + sim$mde_mi5 + sim$mde_mi6 + sim$mde_mi7 + sim$mde_mi8 +
sim$mde_mi9)

sim$mde = sim$mde_ma1 * sim$mde_ma2 * (sim$mde_mi3 + sim$mde_mi4 +
sim$mde_mi5 + sim$mde_mi6 + sim$mde_mi7 + sim$mde_mi8 + sim$mde_mi9 +
sim$mde_bias1) + (1- sim$mde_ma1 * sim$mde_ma2) * (sim$mde_ma1 *
sim$mde_ma2) * (sim$mde_mi3 + sim$mde_mi4 + sim$mde_mi5 + sim$mde_mi6 +
sim$mde_mi7 + sim$mde_mi8 + sim$mde_mi9 + sim$mde_bias2)
```

```
sim$mde_bias = sim$mde - (sim$mde_ma1 + sim$mde_ma2) - (sim$mde_mi3 +
sim$mde_mi4 + sim$mde_mi5 + sim$mde_mi6 + sim$mde_mi7 + sim$mde_mi8 +
sim$mde_mi9 + sim$mde_bias1) - (sim$mde_bias2)

##Definition Below: even the bias and own input variables could not fully
explain the diagnosis
# sim$mde_bias = sim$mde - (sim$mde_mi3 + sim$mde_mi4 + sim$mde_mi5 +
sim$mde_mi6 + sim$mde_mi7 + sim$mde_mi8 + sim$mde_mi9 + sim$mde_bias1) -
(sim$mde_mi3 + sim$mde_mi4 + sim$mde_mi5 + sim$mde_mi6 + sim$mde_mi7 +
sim$mde_mi8 + sim$mde_mi9 + sim$mde_bias2)

# sim$mde_bias = sim$mde - (sim$mde_ma1 + sim$mde_ma2 + sim$mde_mi3 +
sim$mde_mi4 + sim$mde_mi5 + sim$mde_mi6 + sim$mde_mi7 + sim$mde_mi8 +
sim$mde_mi9)

# sim$mde_bias = resid(lm(sim$mde ~ sim$mde_ma1 + sim$mde_ma2 +
sim$mde_mi3 + sim$mde_mi4 + sim$mde_mi5 + sim$mde_mi6 + sim$mde_mi7 +
sim$mde_mi8 + sim$mde_mi9, data=sim))

##DYS

sim$dys_ma = bindata[,16]

sim$dys_mi1_1 = bindata[,17]
sim$dys_mi1_2 = bindata[,18]
sim$dys_mi1 = 1*((sim$dys_mi1_1 + sim$dys_mi1_2) > 0)
sim$dys_mi1_bias = sim$dys_mi1 - sim$dys_mi1_1 - sim$dys_mi1_2

sim$dys_mi4 = bindata[,19]

sim$dys_mi6 = bindata[,20]

sim$dys_mi = 1*((sim$dys_mi1 + sim$mde_mi4 + sim$mde_mi6 + sim$dys_mi4 +
sim$mde_mi8 + sim$dys_mi6)>1)

sim$dys_mi_bias = sim$dys_mi - (sim$dys_mi1 + sim$mde_mi4 + sim$mde_mi6 +
sim$dys_mi4 + sim$mde_mi8 + sim$dys_mi6)

sim$dys = sim$dys_ma * sim$dys_mi

sim$dys_bias = sim$dys - (sim$dys_ma + sim$dys_mi)

# sim$dys_bias = resid(lm(sim$dys ~ sim$dys_ma + sim$dys_mi, data=sim))

##Manic
sim$man_ma1 = bindata2[,1]
sim$man_ma2 = bindata2[,2]
sim$man_ma3 = bindata2[,3]

sim$man_mi1_1 = bindata2[,4]
sim$man_mi1_2 = bindata2[,5]
sim$man_mi1 = 1*((sim$man_mi1_1 + sim$man_mi1_2) > 0)
sim$man_mi1_bias = sim$man_mi1 - (sim$man_mi1_1 + sim$man_mi1_2)
sim$man_mi2 = bindata2[,6]
```

```

sim$man_mi3_1 = bindata2[,7]
sim$man_mi3_2 = bindata2[,8]
sim$man_mi3 = 1*((sim$man_mi3_1 + sim$man_mi3_2) > 0)
sim$man_mi3_bias = sim$man_mi3 - (sim$man_mi3_1 + sim$man_mi3_2)
sim$man_mi4_1 = bindata2[,9]
sim$man_mi4_2 = bindata2[,10]
sim$man_mi4 = 1*((sim$man_mi4_1 + sim$man_mi4_2) > 0)
sim$man_mi4_bias = sim$man_mi4 - (sim$man_mi4_1 + sim$man_mi4_2)
sim$man_mi5 = bindata2[,11]
sim$man_mi6_1 = bindata2[,12]
sim$man_mi6_2 = bindata2[,13]
sim$man_mi6 = 1*((sim$man_mi6_1 + sim$man_mi6_2) > 0)
sim$man_mi6_bias = sim$man_mi6 - (sim$man_mi6_1 + sim$man_mi6_2)
sim$man_mi7 = bindata2[,14]
sim$man_bias1 = 1*((sim$man_mi1 + sim$man_mi2 + sim$man_mi3 + sim$man_mi4
+ sim$man_mi5 + sim$man_mi6 + sim$man_mi7) > 2) - (sim$man_mi1 +
sim$man_mi2 + sim$man_mi3 + sim$man_mi4 + sim$man_mi5 + sim$man_mi6 +
sim$man_mi7)
sim$man_bias2 = 1*((sim$man_mi1 + sim$man_mi2 + sim$man_mi3 + sim$man_mi4
+ sim$man_mi5 + sim$man_mi6 + sim$man_mi7) > 3) - (sim$man_mi1 +
sim$man_mi2 + sim$man_mi3 + sim$man_mi4 + sim$man_mi5 + sim$man_mi6 +
sim$man_mi7)

sim$manic = (1- sim$man_ma1 * sim$man_ma2) * (sim$man_ma1 + sim$man_ma2)
* sim$man_ma3 * (sim$man_mi1 + sim$man_mi2 + sim$man_mi3 + sim$man_mi4 +
sim$man_mi5 + sim$man_mi6 + sim$man_mi7 + sim$man_bias1) + (1 - (1 -
sim$man_ma1 * sim$man_ma2) * (sim$man_ma1 + sim$man_ma2)) * sim$man_ma3 *
(sim$man_mi1 + sim$man_mi2 + sim$man_mi3 + sim$man_mi4 + sim$man_mi5 +
sim$man_mi6 + sim$man_mi7 + sim$man_bias2)

sim$man_bias = sim$manic - (sim$man_ma1 + sim$man_ma2 + sim$man_ma3) -
(sim$man_mi1 + sim$man_mi2 + sim$man_mi3 + sim$man_mi4 + sim$man_mi5 +
sim$man_mi6 + sim$man_mi7 + sim$man_bias1) - (sim$man_bias2)

##end of generate data

resu[, paste(collect, "_", c, sep = "")] = NA
for(r in 1:nrow(resu)){
  #variable characteristics
  if(is.na(resu$variable[r]) == FALSE){
    resu[r, paste0("derivedprevalence_", c, collapse = "")] =
nrow(sim[which(sim[, resu$variable[r]] == 1),])/ssize
    resu[r, paste0("mean_", c, collapse = "")] =
mean(sim[,resu$variable[r]])
    resu[r, paste0("max_", c, collapse = "")] =
max(sim[,resu$variable[r]])
    resu[r, paste0("min_", c, collapse = "")] =
min(sim[,resu$variable[r]])
  }
  ##regression for the diagnosis
  if(is.na(resu$variable[r]) == FALSE & resu$variable[r] !=
resu$outcome[r]){
    eval(parse(text = paste0("templm = summary(lm(", resu$outcome[r],
" ~ ", resu$variable[r], ", data = sim)", collapse = "")))

```

```

      resu[r, paste0("coef_", c, collapse = "")] =
templm$coefficients[resu$variable[r], "Estimate"]
      resu[r, paste0("coefse_", c, collapse = "")] =
templm$coefficients[resu$variable[r], "Std. Error"]
      resu[r, paste0("p_", c, collapse = "")] =
templm$coefficients[resu$variable[r], "Pr(>|t|)"]
      resu[r, paste0("intercept_", c, collapse = "")] =
templm$coefficients["(Intercept)", "Estimate"]
      resu[r, paste0("interceptp_", c, collapse = "")] =
templm$coefficients["(Intercept)", "Pr(>|t|)"]
      resu[r, paste0("r2_", c, collapse = "")] = templm$r.squared
    }

    ##regression for the suboutcome/domain variables
    if(is.na(resu$variable[r]) == FALSE & is.na(resu$suboutcome[r]) ==
FALSE & resu$variable[r] != resu$outcome[r] & resu$variable[r] !=
resu$suboutcome[r]){
      eval(parse(text = paste0("templm = summary(lm(",
resu$suboutcome[r], " ~ ", resu$variable[r], ", data = sim)", collapse =
""))))
      resu[r, paste0("subcoef_", c, collapse = "")] =
templm$coefficients[resu$variable[r], "Estimate"]
      resu[r, paste0("subcoefse_", c, collapse = "")] =
templm$coefficients[resu$variable[r], "Std. Error"]
      resu[r, paste0("subp_", c, collapse = "")] =
templm$coefficients[resu$variable[r], "Pr(>|t|)"]
      resu[r, paste0("subintercept_", c, collapse = "")] =
templm$coefficients["(Intercept)", "Estimate"]
      resu[r, paste0("subinterceptp_", c, collapse = "")] =
templm$coefficients["(Intercept)", "Pr(>|t|)"]
      resu[r, paste0("subr2_", c, collapse = "")] = templm$r.squared
    }

    if(r %in% as.character(1:100*50)){print(c("r:", r))}
}#r = rows of the variable list

##Approximation by own, bias or all variables

plotting
#plotting area_start: only the last simulation data set used for
library(leaps)
#MDE
#own variables only
mdeown = NA
library(car)
sim.new = sim[,c("mde",
names(summary((lm(as.formula(paste0("mde ~ ", paste0(names(sim)
[grepl("mde_", names(sim)) == TRUE & grepl("bias", names(sim)) == FALSE],
collapse = " + "), collapse = "")), data = sim)))$aliases)
[summary((lm(as.formula(paste0("mde ~ ", paste0(names(sim)[grepl("mde_",
names(sim)) == TRUE & grepl("bias", names(sim)) == FALSE], collapse = " +
"), collapse = "")), data = sim)))$aliases == FALSE &
names(summary((lm(as.formula(paste0("mde ~ ", paste0(names(sim)
[grepl("mde_", names(sim)) == TRUE & grepl("bias", names(sim)) == FALSE],
collapse = " + "), collapse = "")), data = sim)))$aliases) !=
"(Intercept)"])]

```

```
for(repe in 1:40){
  tempvif = vif(lm(mde~., data = sim.new))
  if(any(tempvif > 10)){
    sim.new = sim.new[,which(names(sim.new) != names(tempvif)
[which(tempvif == tempvif[order(-tempvif)][1]])]]
  }
}

try(
  (mdeown = regsubsets(mde~., data = sim.new, really.big=T,
method = "forward", nvmax = ncol(sim.new))), silent = F
)

mdeownsummary = NA
if(any(is.na(mdeown)) == FALSE){
  mdeownsummary = summary(mdeown)
}

mdeownsummary$adjr2

##own and bias variables
mdebias = NA

mdebias = regsubsets(as.formula(paste0("mde ~ ",
paste0(names(sim)[grepl("mde_", names(sim)) == TRUE & grepl("bias",
names(sim)) == TRUE], collapse = " + ")), collapse = "")), data = sim,
nvmax = 100, really.big=T, method = "forward")
mdebiassummary = summary(mdebias)
mdebiassummary$adjr2

##all variables
###in case of collinearity
mdeall = NA

##Deal with collinearity
library(car)
sim.new = sim[,c("mde", names(summary((lm(mde~., data = sim)))
$aliased)[summary((lm(mde~., data = sim)))$aliased == FALSE &
names(summary((lm(mde~., data = sim)))$aliased) != "(Intercept)"])]

for(repe in 1:40){
  tempvif = vif(lm(mde~., data = sim.new))
  if(any(tempvif > 10)){
    sim.new = sim.new[,which(names(sim.new) != names(tempvif)
[which(tempvif == tempvif[order(-tempvif)][1]])]]
  }
}

##Somehow there are problems in executing regsubsets even after
removing collinear variables
```



```

    try(
      (mdeall = regsubsets(mde~., data = sim.new, really.big=T,
method = "forward", nvmax = ncol(sim.new))), silent = F
    )

    mdeallsummary = NA
    if(any(is.na(mdeall)) == FALSE){
      mdeallsummary = summary(mdeall)
    }

    # mdeallsummary$adjr2

    #DYS
    #dys
    #own variables only
    dysown = NA
      library(car)
      sim.new = sim[,c("dys",
names(summary(lm(as.formula(paste0("dys ~ ", paste0(c(names(sim)
[(grepl("dys_", names(sim)) == TRUE | grepl("mde_mi4", names(sim)) ==
TRUE | grepl("mde_mi6", names(sim)) == TRUE | grepl("mde_mi8",
names(sim)) == TRUE) & grepl("bias", names(sim)) == FALSE]), collapse = "
+ "), collapse = "")), data = sim))]$aliased)
[summary(lm(as.formula(paste0("dys ~ ", paste0(c(names(sim)
[(grepl("dys_", names(sim)) == TRUE | grepl("mde_mi4", names(sim)) ==
TRUE | grepl("mde_mi6", names(sim)) == TRUE | grepl("mde_mi8",
names(sim)) == TRUE) & grepl("bias", names(sim)) == FALSE]), collapse = "
+ "), collapse = "")), data = sim))]$aliased == FALSE &
names(summary(lm(as.formula(paste0("dys ~ ", paste0(c(names(sim)
[(grepl("dys_", names(sim)) == TRUE | grepl("mde_mi4", names(sim)) ==
TRUE | grepl("mde_mi6", names(sim)) == TRUE | grepl("mde_mi8",
names(sim)) == TRUE) & grepl("bias", names(sim)) == FALSE]), collapse = "
+ "), collapse = "")), data = sim))]$aliased) != "(Intercept)"]]]

      for(repe in 1:40){
        tempvif = vif(lm(dys~., data = sim.new))
        if(any(tempvif > 10)){
          sim.new = sim.new[,which(names(sim.new) != names(tempvif)
[which(tempvif == tempvif[order(-tempvif)][1]])]]
        }
      }
      ##Somehow there are problems in executing regsubsets even after
removing collinear variables
      try(
        (dysown = regsubsets(dys~., data = sim.new, really.big=T,
method = "forward", nvmax = 100)), silent = T
      )

      if(any(is.na(dysown)) == FALSE){
        dysownsummary = summary(dysown)
      }

      ##own and bias variables
      dysbias = NA

```

```

    dysbias = regsubsets(as.formula(paste0("dys ~ ",
paste0(names(sim)[(grepl("dys_", names(sim)) == TRUE | grepl("mde_mi4",
names(sim)) == TRUE | grepl("mde_mi6", names(sim)) == TRUE |
grepl("mde_mi8", names(sim)) == TRUE) & grepl("bias", names(sim)) ==
TRUE]), collapse = " + "), collapse = ""), data = sim, nvmax = 100,
really.big=T, method = "forward")
    dysbiassummary = summary(dysbias)
    dysbiassummary$adjr2

##all variables
###in case of collinearity
dysall = NA
library(car)
sim.new = sim[,c("dys", names(summary((lm(dys~., data = sim)))
$aliased)[summary((lm(dys~., data = sim)))$aliased == FALSE &
names(summary((lm(dys~., data = sim)))$aliased) != "(Intercept)"])]

    for(repe in 1:40){
        tempvif = vif(lm(dys~., data = sim.new))
        if(any(tempvif > 10)){
            sim.new = sim.new[,which(names(sim.new) != names(tempvif)
[which(tempvif == tempvif[order(-tempvif)][1]])]]
        }
    }
    ##Somehow there are problems in executing regsubsets even after
removing collinear variables
    try(
        (dysall = regsubsets(dys~., data = sim.new, really.big=T,
method = "forward", nvmax = 100)), silent = T
    )

    if(any(is.na(dysall)) == FALSE){
        dysallsummary = summary(dysall)
    }
    # dysallsummary$adjr2

#manic
#own variables only
manown = NA
    library(car)
    sim.new = sim[,c("manic",
names(summary((lm(as.formula(paste0("manic ~ ", paste0(names(sim)
[grepl("man_", names(sim)) == TRUE & grepl("bias", names(sim)) == FALSE],
collapse = " + "), collapse = "")), data = sim)))$aliased)
[summary((lm(as.formula(paste0("manic ~ ", paste0(names(sim)
[grepl("man_", names(sim)) == TRUE & grepl("bias", names(sim)) == FALSE],
collapse = " + "), collapse = "")), data = sim)))$aliased == FALSE &
names(summary((lm(as.formula(paste0("manic ~ ", paste0(names(sim)
[grepl("man_", names(sim)) == TRUE & grepl("bias", names(sim)) == FALSE],
collapse = " + "), collapse = "")), data = sim)))$aliased) !=
"(Intercept)"])]
    for(repe in 1:40){
        tempvif = vif(lm(manic~., data = sim.new))
        if(any(tempvif > 10)){

```

```

        sim.new = sim.new[,which(names(sim.new) != names(tempvif)
[which(tempvif == tempvif[order(-tempvif)][1]])]]
    }
}
try(
  (manown = regsubsets(manic~., data = sim.new, really.big=T,
method = "forward", nvmax = 100)), silent = T
)
manownsummary = NA
if(any(is.na(manown)) == FALSE){
  manownsummary = summary(manown)
}

##own and bias variables
manbias = NA

manbias = regsubsets(as.formula(paste0("manic ~ ",
paste0(names(sim)[grepl("man_", names(sim)) == TRUE & grepl("bias",
names(sim)) == TRUE], collapse = " + "), collapse = "")), data = sim,
nvmax = 100, really.big=T, method = "forward")
manbiassummary = summary(manbias)
manbiassummary$adjr2

##all variables
###in case of collinearity
manall = NA
  library(car)
  sim.new = sim[,c("manic", names(summary((lm(manic~., data =
sim)))$aliased)[summary((lm(manic~., data = sim)))$aliased == FALSE &
names(summary((lm(manic~., data = sim)))$aliased) != "(Intercept)"])]
  for(repe in 1:40){
    tempvif = vif(lm(manic~., data = sim.new))
    if(any(tempvif > 10)){
      sim.new = sim.new[,which(names(sim.new) != names(tempvif)
[which(tempvif == tempvif[order(-tempvif)][1]])]]
    }
  }
##Somehow there are problems in executing regsubsets even after
removing collinear variables
try(
  (manall = regsubsets(manic~., data = sim.new, really.big=T,
method = "forward", nvmax = 100)), silent = T
)
manallsummary = NA
if(any(is.na(manall)) == FALSE){
  manallsummary = summary(manall)
}

##extract information from the outmat
#MDE

resu[which(resu$variable == "mde"), paste0("appbyownr2_", c,
collapse = "")] = mdeownsummary$adjr2[which.max(mdeownsummary$adjr2)]
resu[which(resu$variable == "mde"), paste0("appbyownn_", c,
collapse = "")] = which.max(mdeownsummary$adjr2)

```

```
    resu[which(resu$variable == "mde"), paste0("appbyownvar_", c,
collapse = "")] = paste0(dimnames(mdeownsummary$outmat)[[2]]
[which(mdeownsummary$outmat[which.max(mdeownsummary$adjr2),] == "*")],
collapse = ",")

    resu[which(resu$variable == "mde"), paste0("appbybiasr2_", c,
collapse = "")] = mdebiassummary$adjr2[which.max(mdebiassummary$adjr2)]
    resu[which(resu$variable == "mde"), paste0("appbybiasn_", c,
collapse = "")] = which.max(mdebiassummary$adjr2)
    resu[which(resu$variable == "mde"), paste0("appbybiasvar_", c,
collapse = "")] = paste0(dimnames(mdebiassummary$outmat)[[2]]
[which(mdebiassummary$outmat[which.max(mdebiassummary$adjr2),] == "*")],
collapse = ",")

    if(any(is.na(mdeall)) == FALSE){
        resu[which(resu$variable == "mde"), paste0("appbyallr2_",
c, collapse = "")] = mdeallsummary$adjr2[which.max(mdeallsummary$adjr2)]
        resu[which(resu$variable == "mde"), paste0("appbyalln_", c,
collapse = "")] = which.max(mdeallsummary$adjr2)
        resu[which(resu$variable == "mde"), paste0("appbyallvar_",
c, collapse = "")] = paste0(dimnames(mdeallsummary$outmat)[[2]]
[which(mdeallsummary$outmat[which.max(mdeallsummary$adjr2),] == "*")],
collapse = ",")
    }

    #DYS
    resu[which(resu$variable == "dys"), paste0("appbyownr2_", c,
collapse = "")] = dysownsummary$adjr2[which.max(dysownsummary$adjr2)]
    resu[which(resu$variable == "dys"), paste0("appbyownn_", c,
collapse = "")] = which.max(dysownsummary$adjr2)
    resu[which(resu$variable == "dys"), paste0("appbyownvar_", c,
collapse = "")] = paste0(dimnames(dysownsummary$outmat)[[2]]
[which(dysownsummary$outmat[which.max(dysownsummary$adjr2),] == "*")],
collapse = ",")

    resu[which(resu$variable == "dys"), paste0("appbybiasr2_", c,
collapse = "")] = dysbiassummary$adjr2[which.max(dysbiassummary$adjr2)]
    resu[which(resu$variable == "dys"), paste0("appbybiasn_", c,
collapse = "")] = which.max(dysbiassummary$adjr2)
    resu[which(resu$variable == "dys"), paste0("appbybiasvar_", c,
collapse = "")] = paste0(dimnames(dysbiassummary$outmat)[[2]]
[which(dysbiassummary$outmat[which.max(dysbiassummary$adjr2),] == "*")],
collapse = ",")

    if(any(is.na(dysall)) == FALSE){
        resu[which(resu$variable == "dys"), paste0("appbyallr2_", c,
collapse = "")] = dysallsummary$adjr2[which.max(dysallsummary$adjr2)]
        resu[which(resu$variable == "dys"), paste0("appbyalln_", c,
collapse = "")] = which.max(dysallsummary$adjr2)
        resu[which(resu$variable == "dys"), paste0("appbyallvar_", c,
collapse = "")] = paste0(dimnames(dysallsummary$outmat)[[2]]
[which(dysallsummary$outmat[which.max(dysallsummary$adjr2),] == "*")],
collapse = ",")
    }
}
```

```

#MANIC
  resu[which(resu$variable == "manic"), paste0("appbyownr2_", c,
collapse = "")] = manownsummary$adjr2[which.max(manownsummary$adjr2)]
  resu[which(resu$variable == "manic"), paste0("appbyownn_", c,
collapse = "")] = which.max(manownsummary$adjr2)
  resu[which(resu$variable == "manic"), paste0("appbyownvar_", c,
collapse = "")] = paste0(dimnames(manownsummary$outmat)[[2]]
[which(manownsummary$outmat[which.max(manownsummary$adjr2),] == "*")],
collapse = ",")

  resu[which(resu$variable == "manic"), paste0("appbybiasr2_", c,
collapse = "")] = manbiassummary$adjr2[which.max(manbiassummary$adjr2)]
  resu[which(resu$variable == "manic"), paste0("appbybiasn_", c,
collapse = "")] = which.max(manbiassummary$adjr2)
  resu[which(resu$variable == "manic"), paste0("appbybiasvar_",
c, collapse = "")] = paste0(dimnames(manbiassummary$outmat)[[2]]
[which(manbiassummary$outmat[which.max(manbiassummary$adjr2),] == "*")],
collapse = ",")

  if(any(is.na(manall)) == FALSE){
    resu[which(resu$variable == "manic"), paste0("appbyallr2_",
c, collapse = "")] = manallsummary$adjr2[which.max(manallsummary$adjr2)]
    resu[which(resu$variable == "manic"), paste0("appbyalln_", c,
collapse = "")] = which.max(manallsummary$adjr2)
    resu[which(resu$variable == "manic"), paste0("appbyallvar_",
c, collapse = "")] = paste0(dimnames(manallsummary$outmat)[[2]]
[which(manallsummary$outmat[which.max(manallsummary$adjr2),] == "*")],
collapse = ",")
  }

  print(c("c:", c))
  print(c("cor:", rho[rh]))
  print(c("Prevalence: ", prevalence[preval]))

}#c

##adding summary statistics to the result data frame
resu[, paste(collect, "_mean", sep = "")] = NA
resu[, paste(collect, "_sd", sep = "")] = NA
resu[, paste(collect, "_se", sep = "")] = NA
resu[, paste(collect, "_95up", sep = "")] = NA
resu[, paste(collect, "_95lo", sep = "")] = NA
resu[, paste(collect, "_rangeup", sep = "")] = NA
resu[, paste(collect, "_rangelo", sep = "")] = NA

for(co in 1:length(collect)){
  for(r in 1:nrow(resu)){
    if((collect[co] %in% c("appbyownvar", "appbybiasvar", "appbyallvar"))
== FALSE){
      resu[r,paste0(collect[co], "_mean", collapse = "")] =
mean(unlist(resu[r, paste(collect[co], "_", 1:times, sep = "")][which(!
is.na(unlist(resu[r, paste(collect[co], "_", 1:times, sep = ""))]))))

```

```

    resu[r,paste0(collect[co], "_sd", collapse = "")] = sd(unlist(resu[r,
paste(collect[co], "_", 1:times, sep = "")][which(!is.na(unlist(resu[r,
paste(collect[co], "_", 1:times, sep = ""))]))]))
    resu[r,paste0(collect[co], "_se", collapse = "")] = sd(unlist(resu[r,
paste(collect[co], "_", 1:times, sep = "")][which(!is.na(unlist(resu[r,
paste(collect[co], "_", 1:times, sep = ""))]))]))/(times^0.5)

#95% CIs
resu[r,paste0(collect[co], "_95up", collapse = "")] =
resu[r,paste0(collect[co], "_mean", collapse = "")] +
1.96*resu[r,paste0(collect[co], "_se", collapse = "")]
resu[r,paste0(collect[co], "_95lo", collapse = "")] =
resu[r,paste0(collect[co], "_mean", collapse = "")] -
1.96*resu[r,paste0(collect[co], "_se", collapse = "")]

#range
resu[r,paste0(collect[co], "_rangelo", collapse = "")] =
min(resu[r,paste(collect[co], "_", 1:times, sep = "")])
resu[r,paste0(collect[co], "_rangeup", collapse = "")] =
max(resu[r,paste(collect[co], "_", 1:times, sep = "")])
}#r

##Add information about the aliased variables

##save in another data set
eval(parse(text = paste0("resu_cor", rho[rh], "_preval",
prevalence[preval], " = resu", collapse = "")))

}

#export results
write.csv(cbind(resu[,c("definition", "variable", "mean_mean",
"mean_95up", "mean_95lo", "max_rangeup",
"min_rangelo", "derivedprevalence_mean", "derivedprevalence_95up",
"derivedprevalence_95lo", "coef_mean", "coef_95up", "coef_95lo",
"p_mean", "p_95up", "p_95lo", "r2_mean", "r2_95up",
"r2_95lo", "subcoef_mean", "subcoef_95up", "subcoef_95lo",
"subp_mean", "subp_95up", "subp_95lo", "subr2_mean", "subr2_95up",
"subr2_95lo", "appbyownr2_mean", "appbyownr2_95up", "appbyownr2_95lo",
"appbyownn_mean", "appbyownn_95up", "appbyownn_95lo", "appbybiasr2_mean",
"appbybiasr2_95up", "appbybiasr2_95lo", "appbybiasn_mean",
"appbybiasn_95up", "appbybiasn_95lo", "appbyallr2_mean",
"appbyallr2_95up", "appbyallr2_95lo", "appbyalln_mean", "appbyalln_95up",
"appbyalln_95lo"
)], resu), file = paste0("simulation results_cor", rho[rh], "_preval",
prevalence[preval], ".csv"))

}#co

```

```
print(c("cor:", rho[rh]))
print(c("Prevalence: ", prevalence[preval]))

  }#rho
#store data

print(c("Prevalence: ", prevalence[preval]))
  }#prevalence

...

```

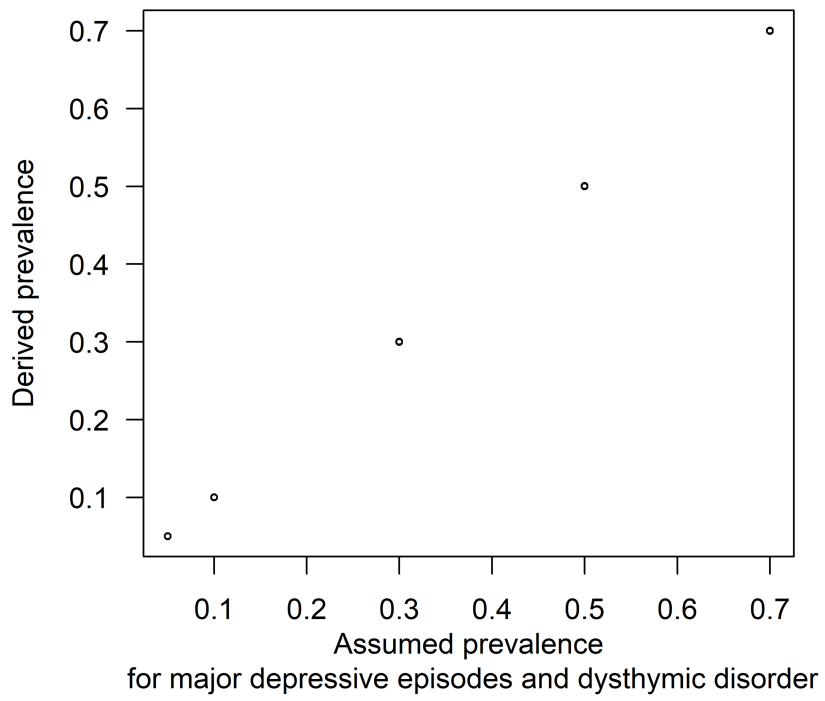



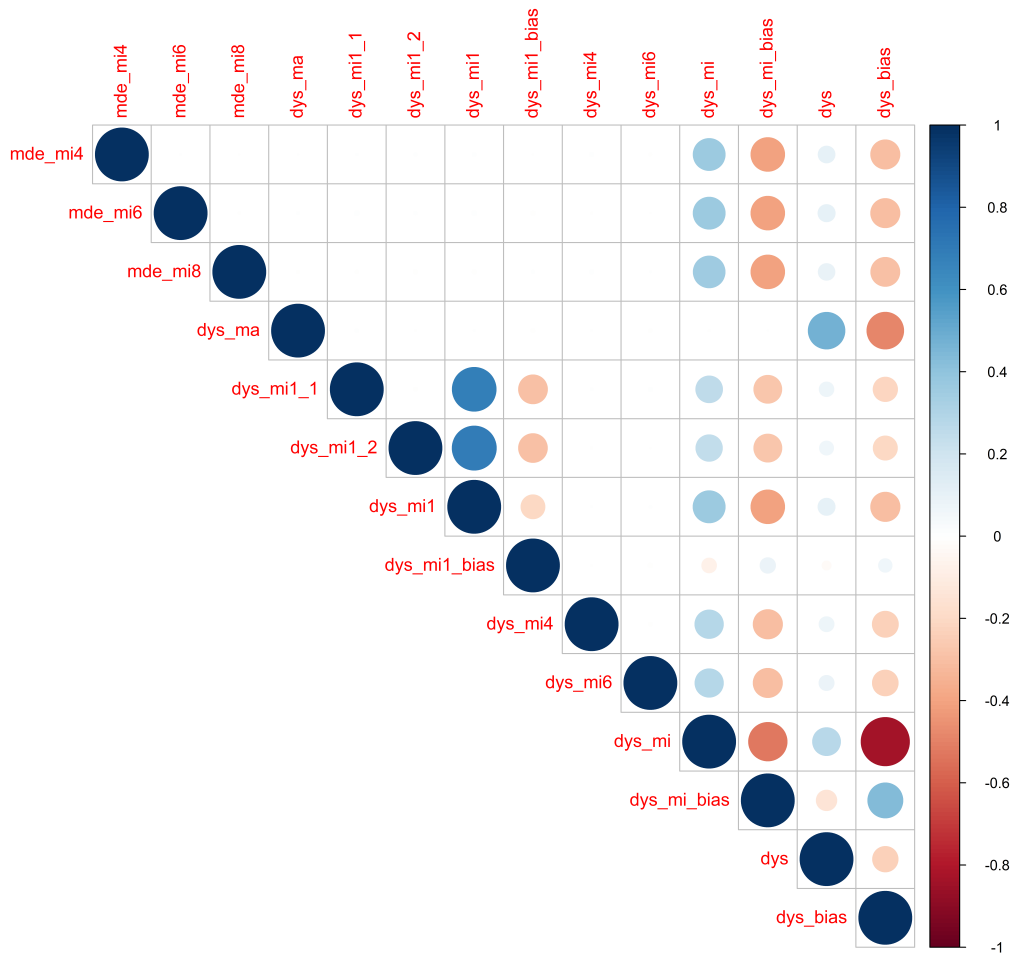

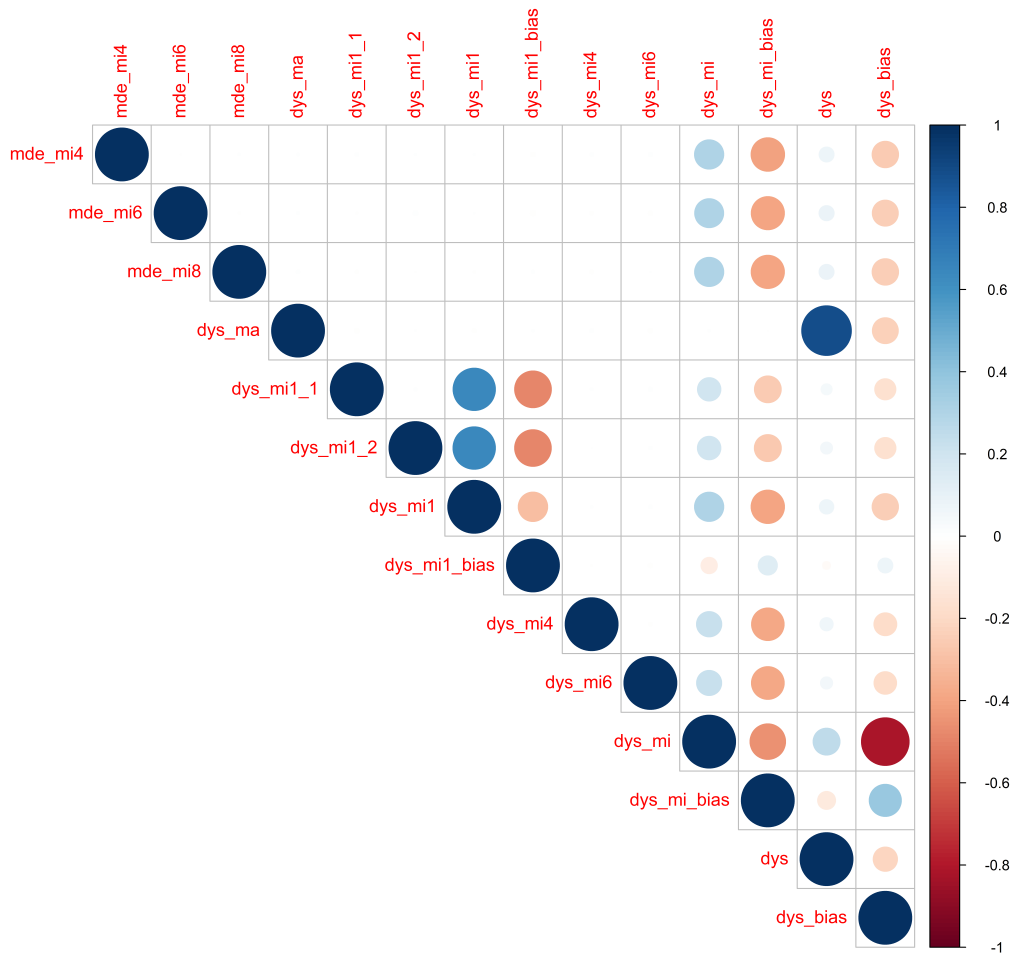

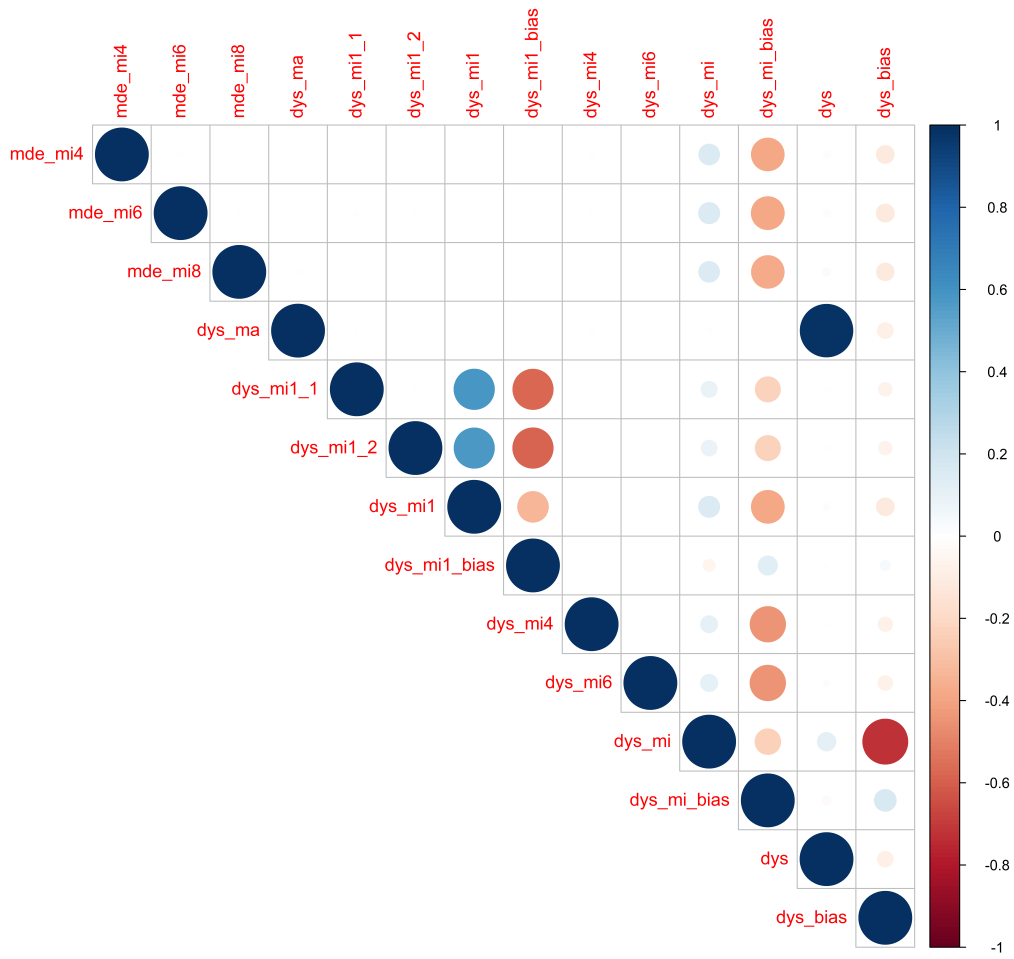

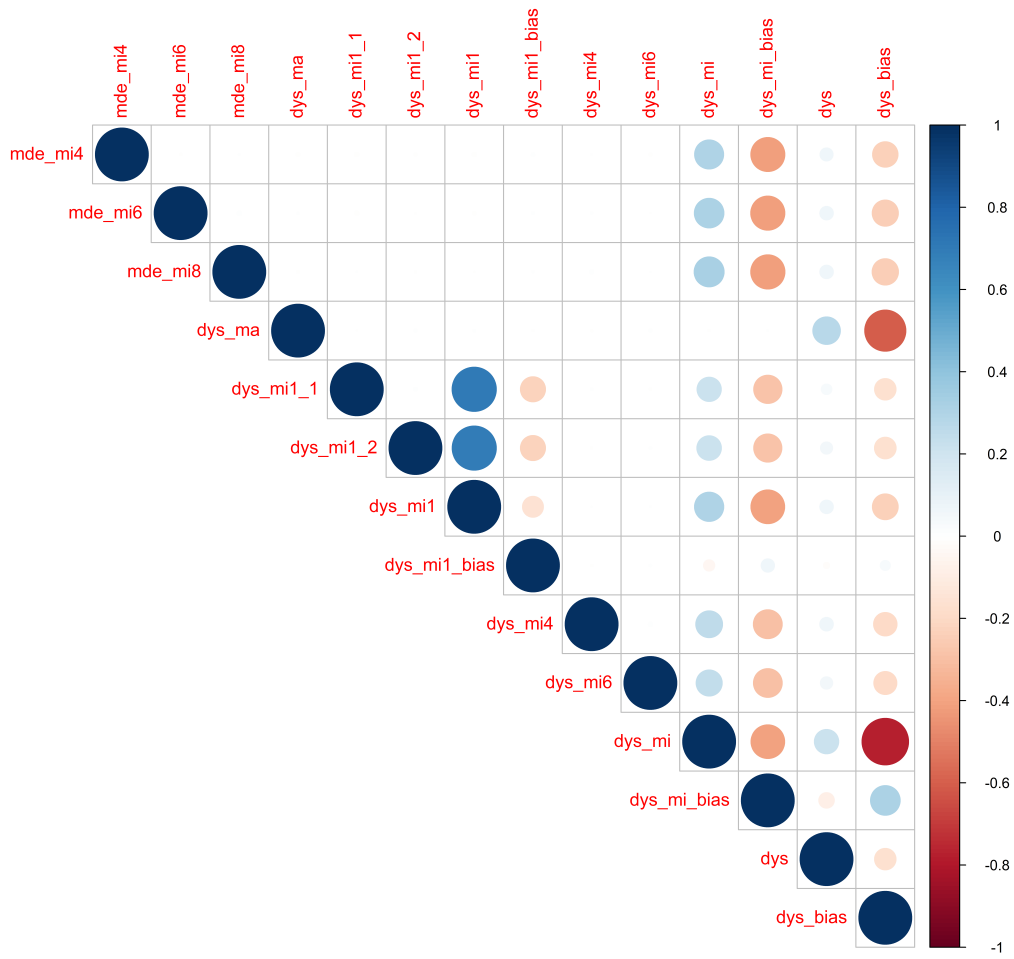

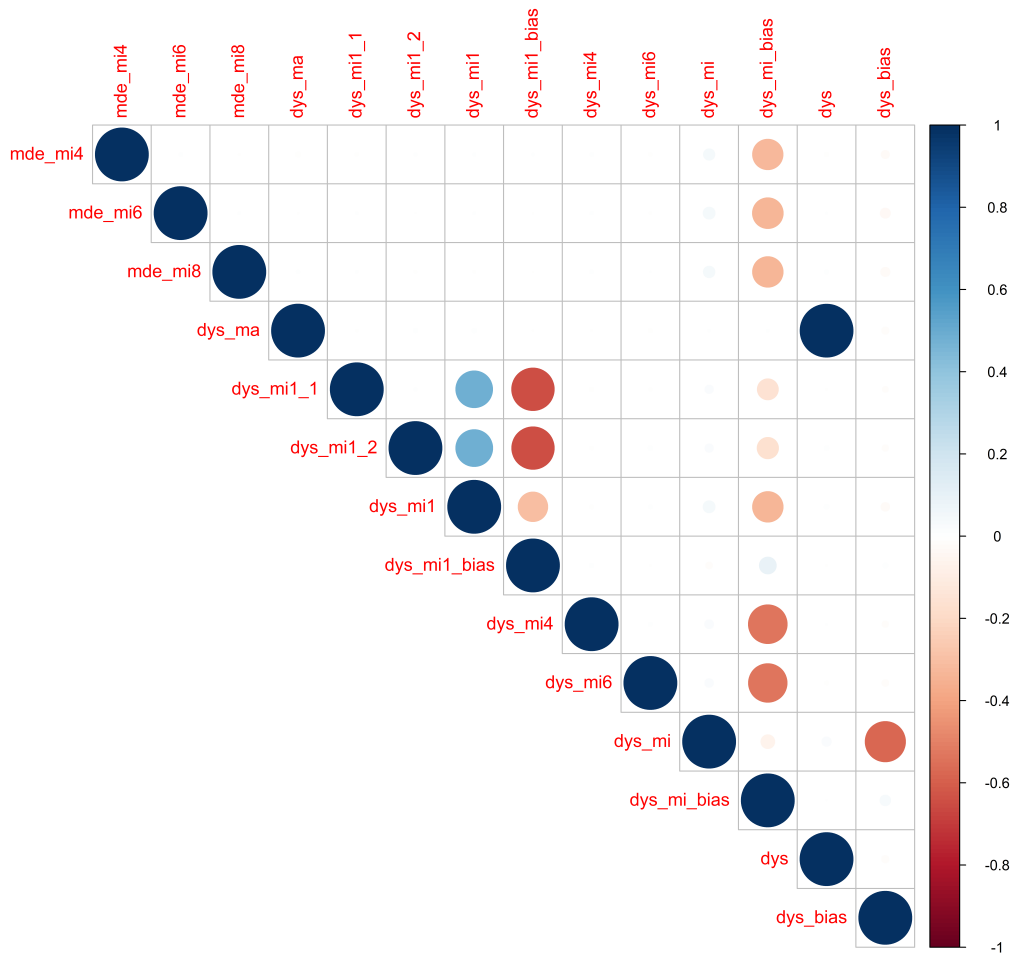

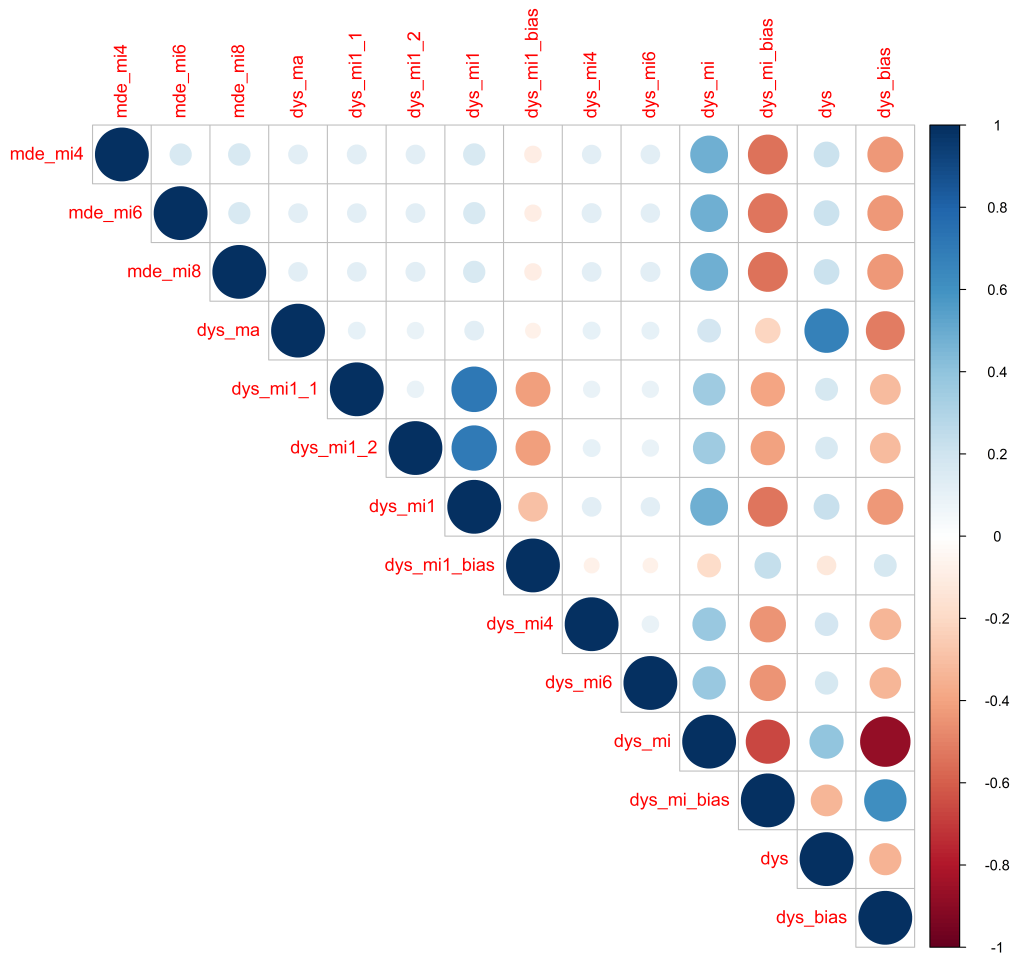

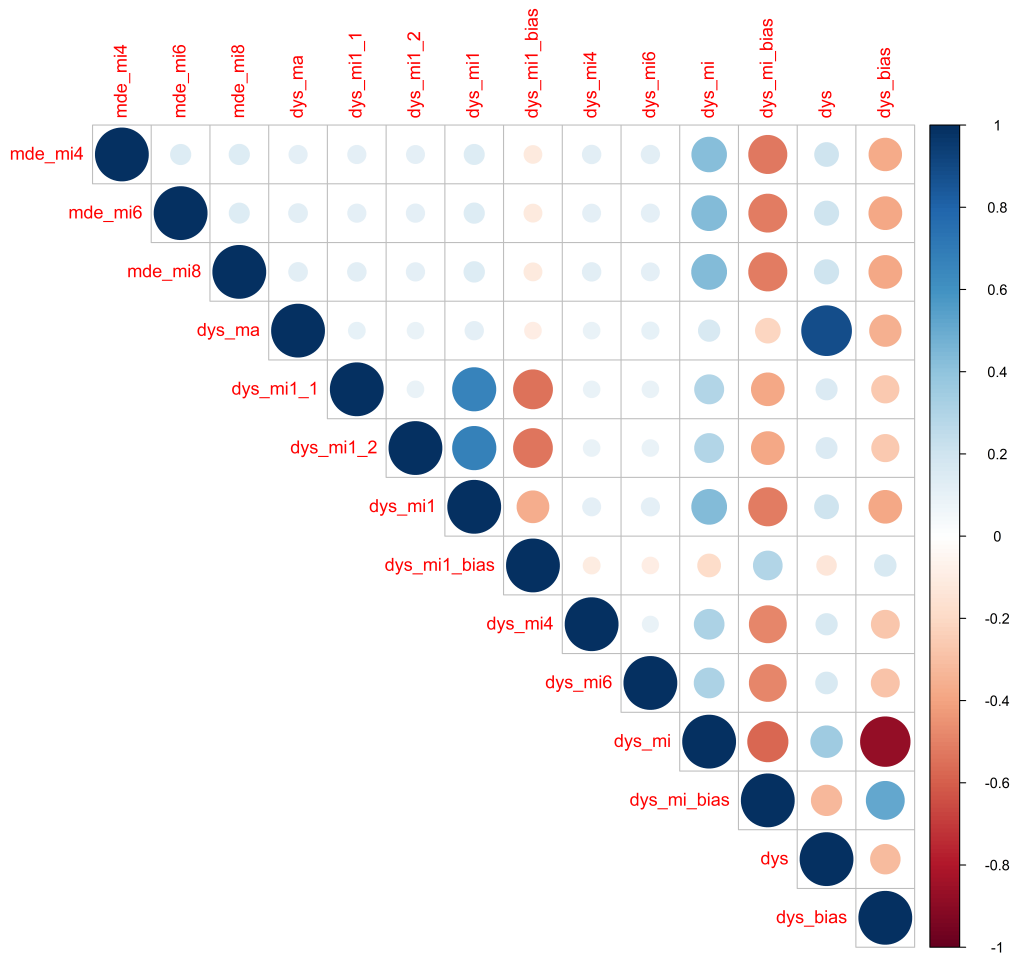

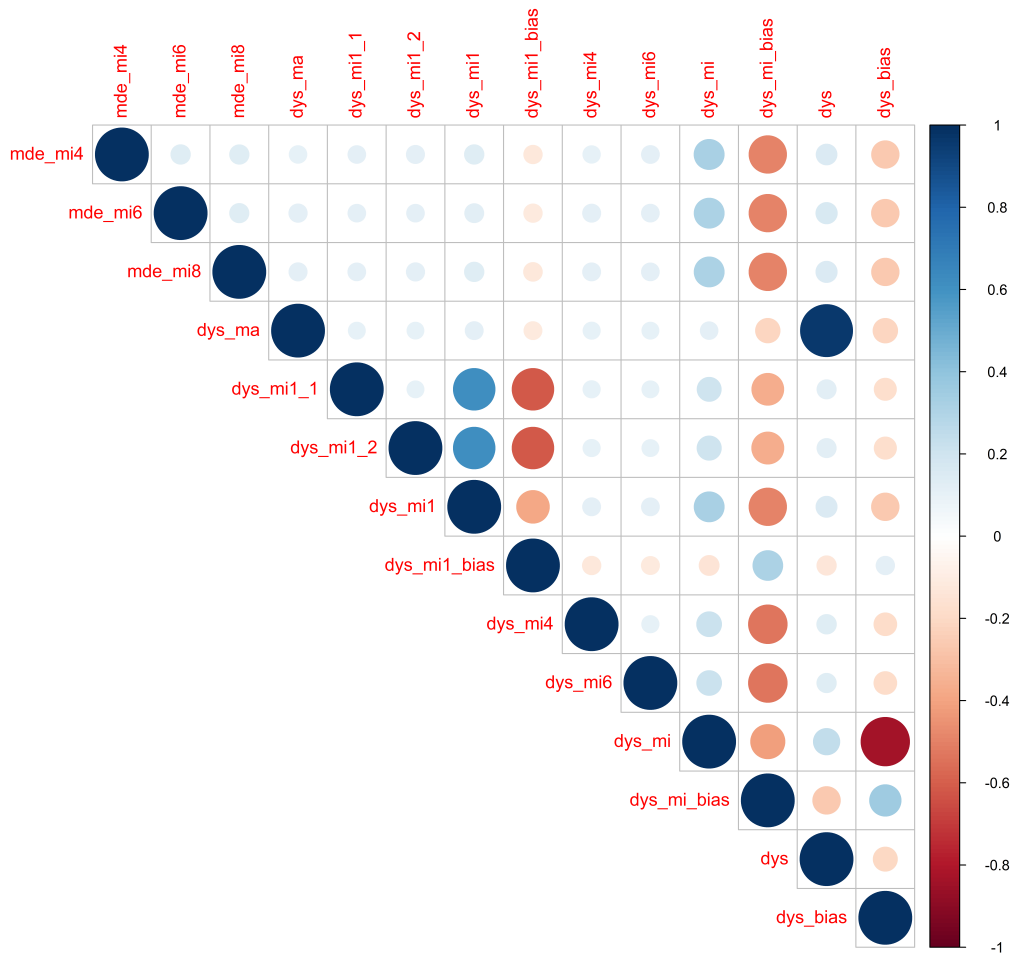



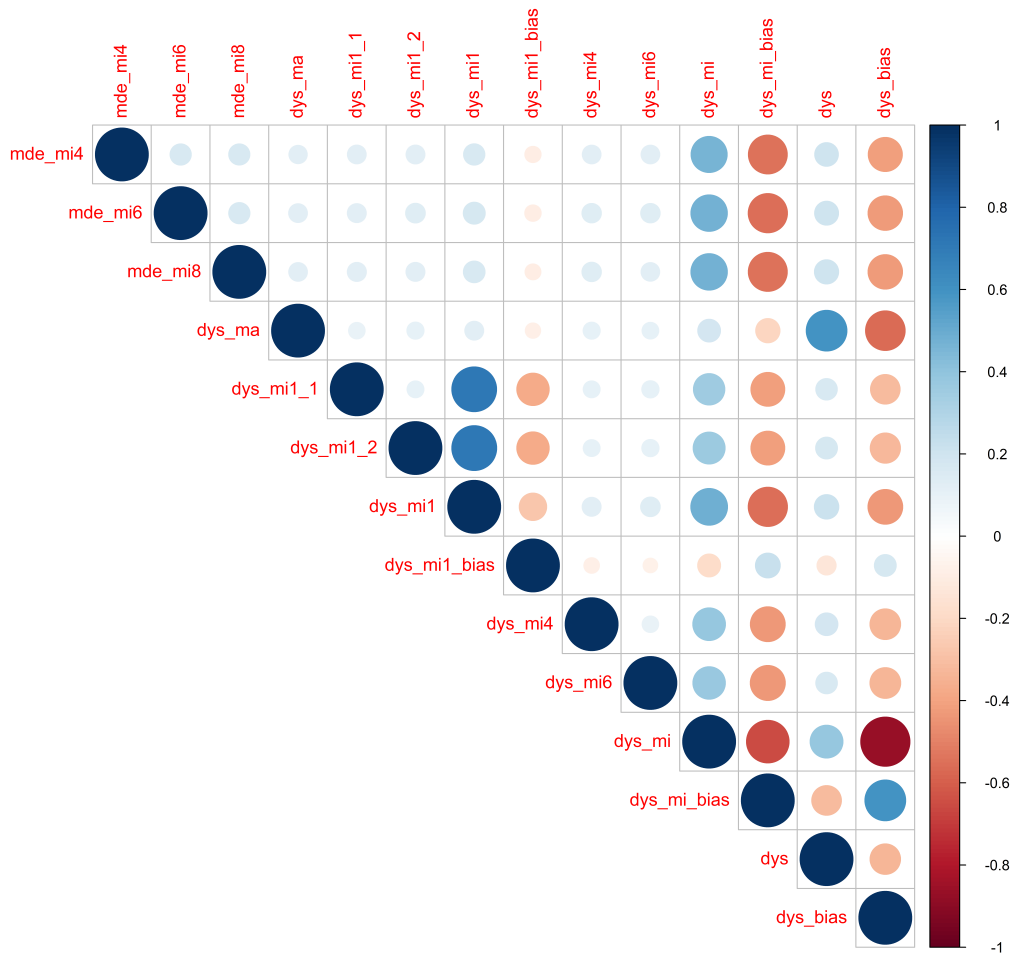

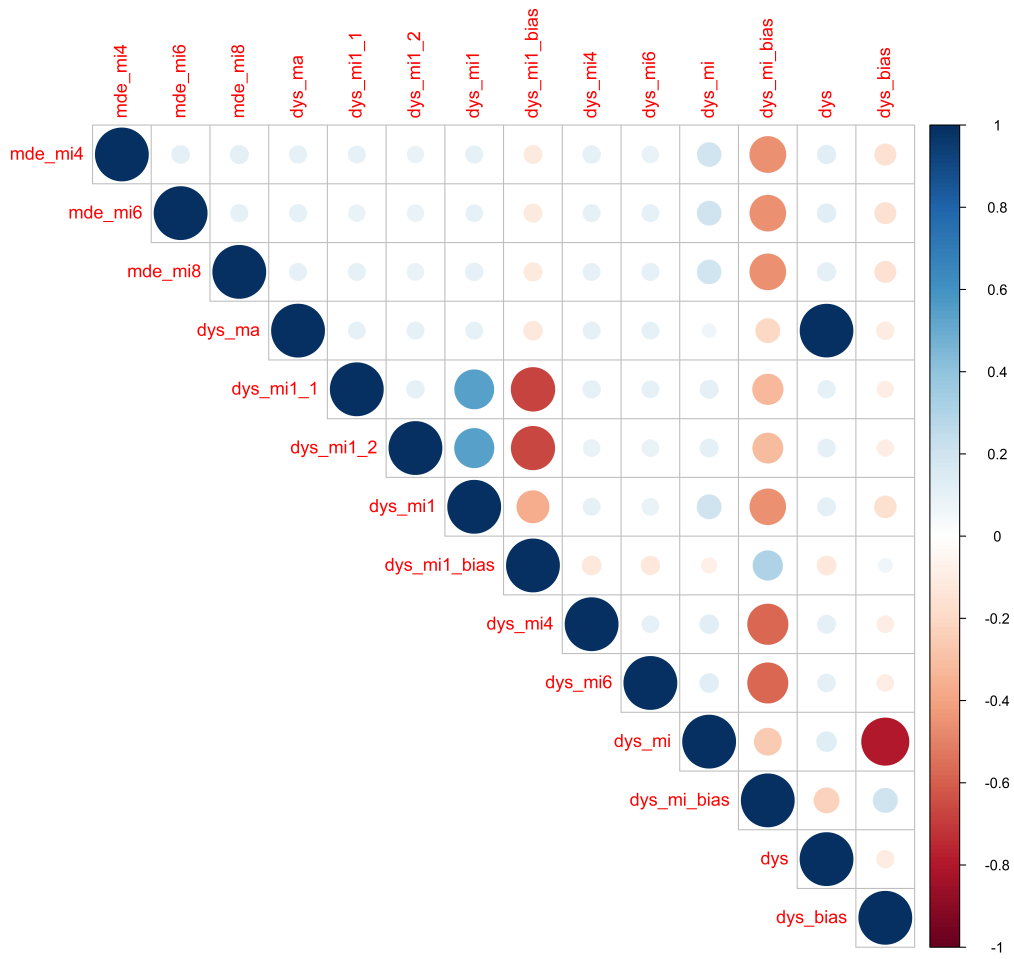

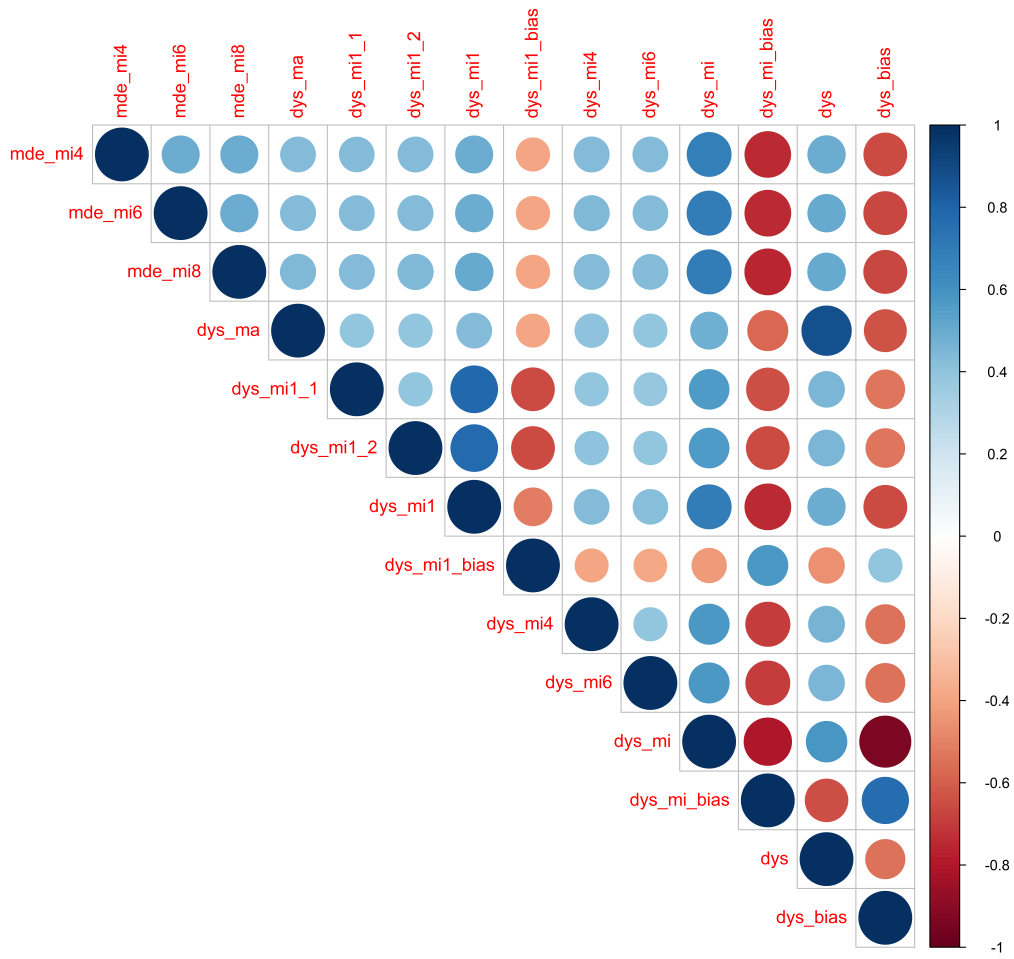

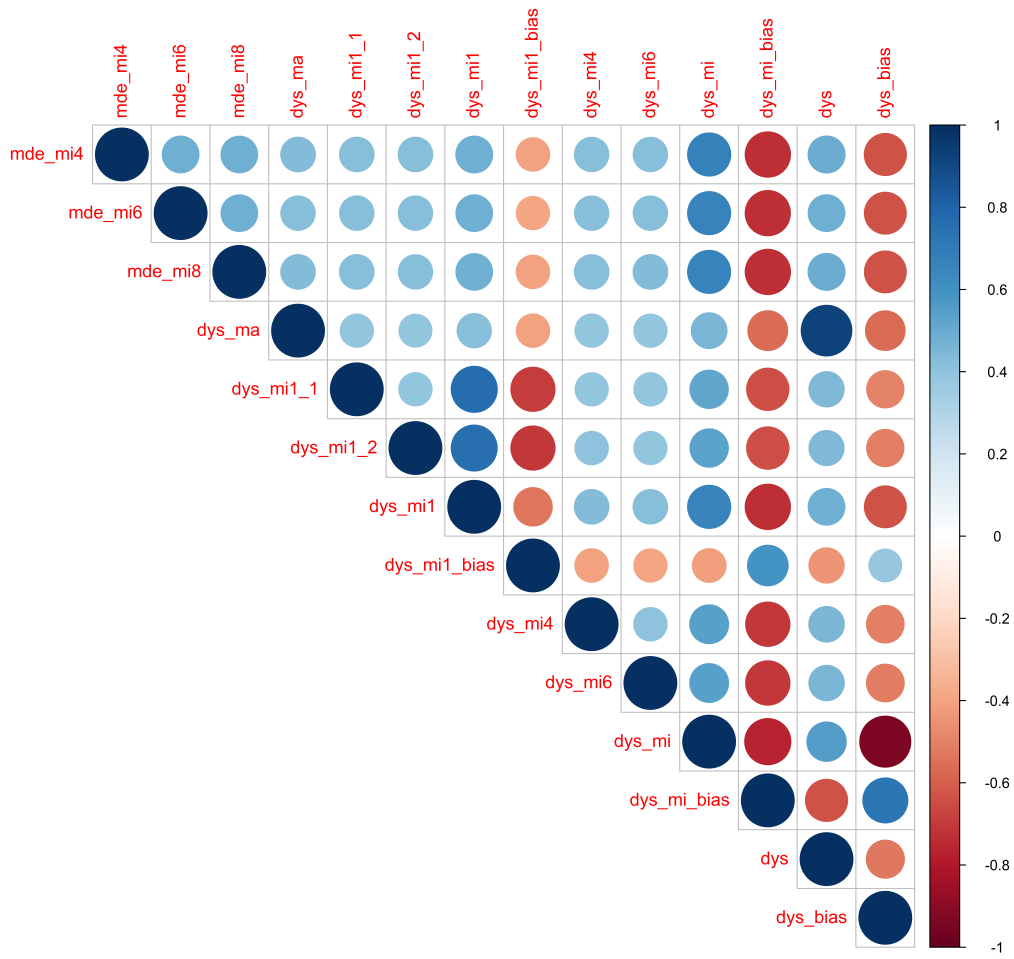

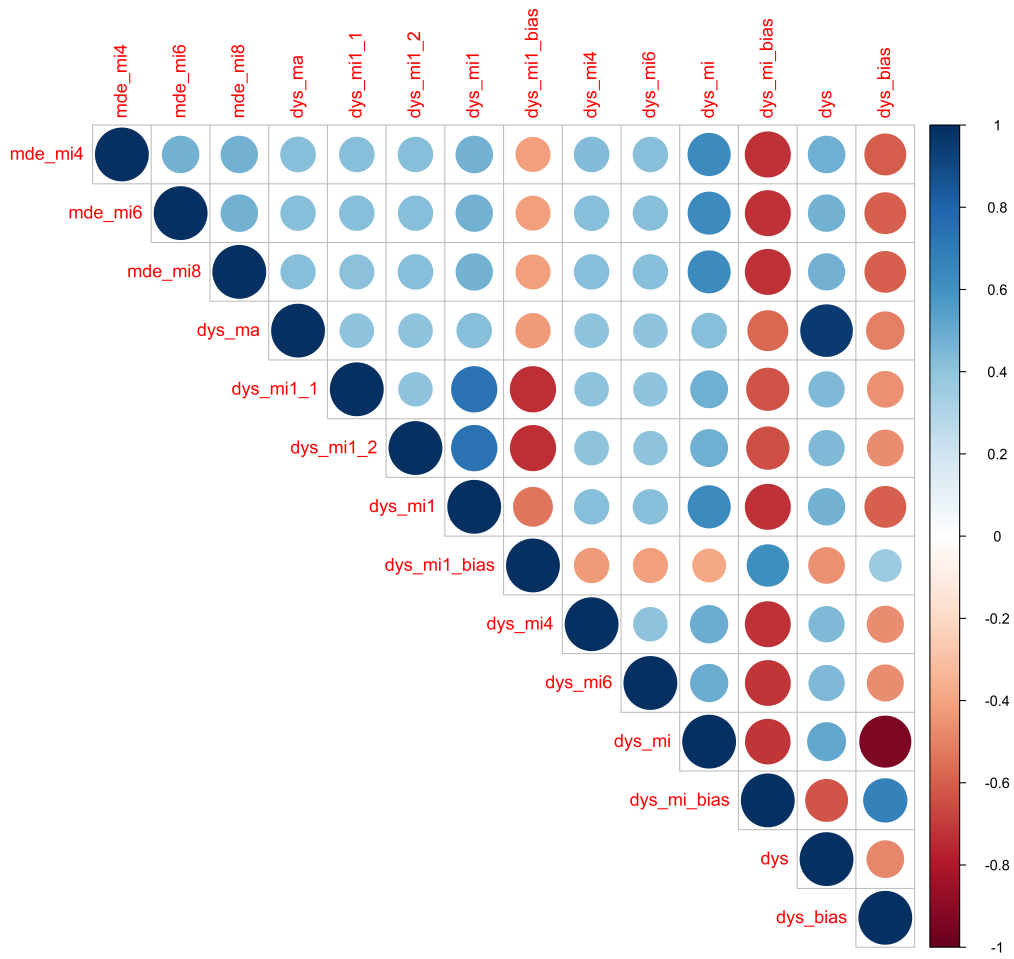

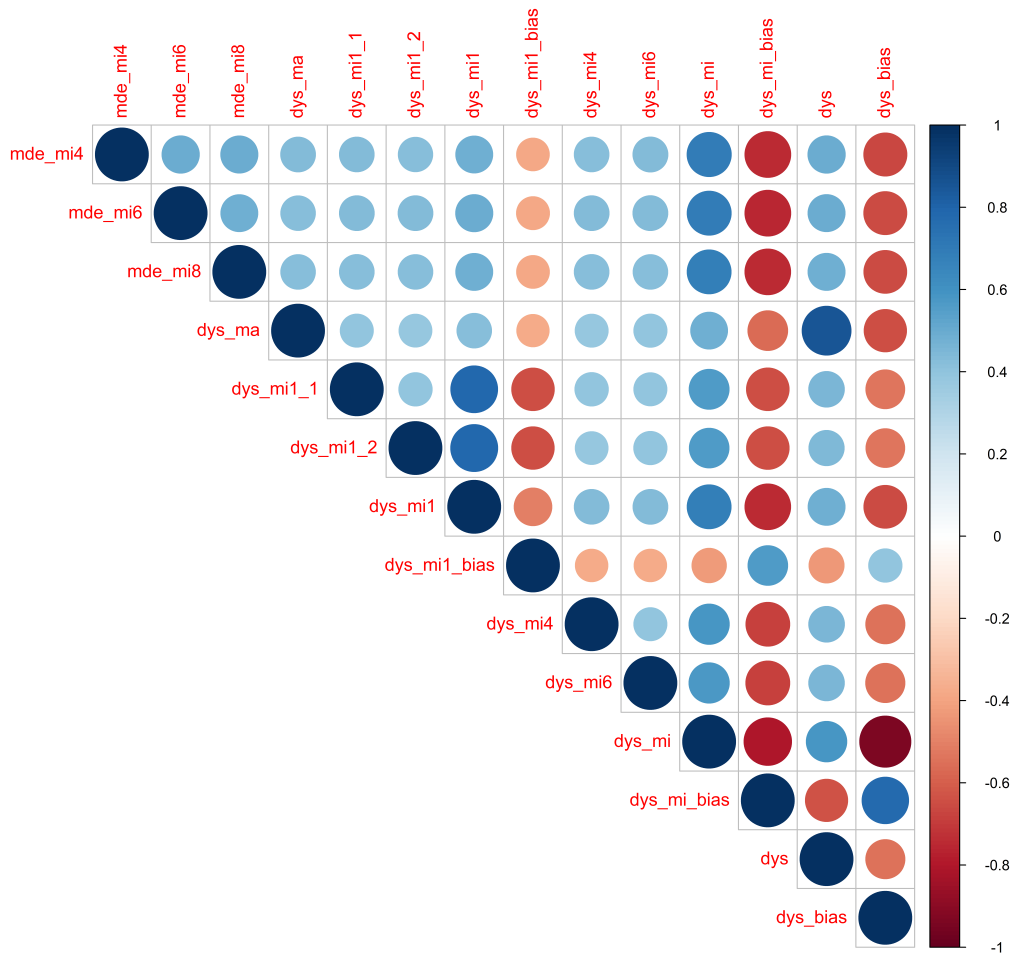

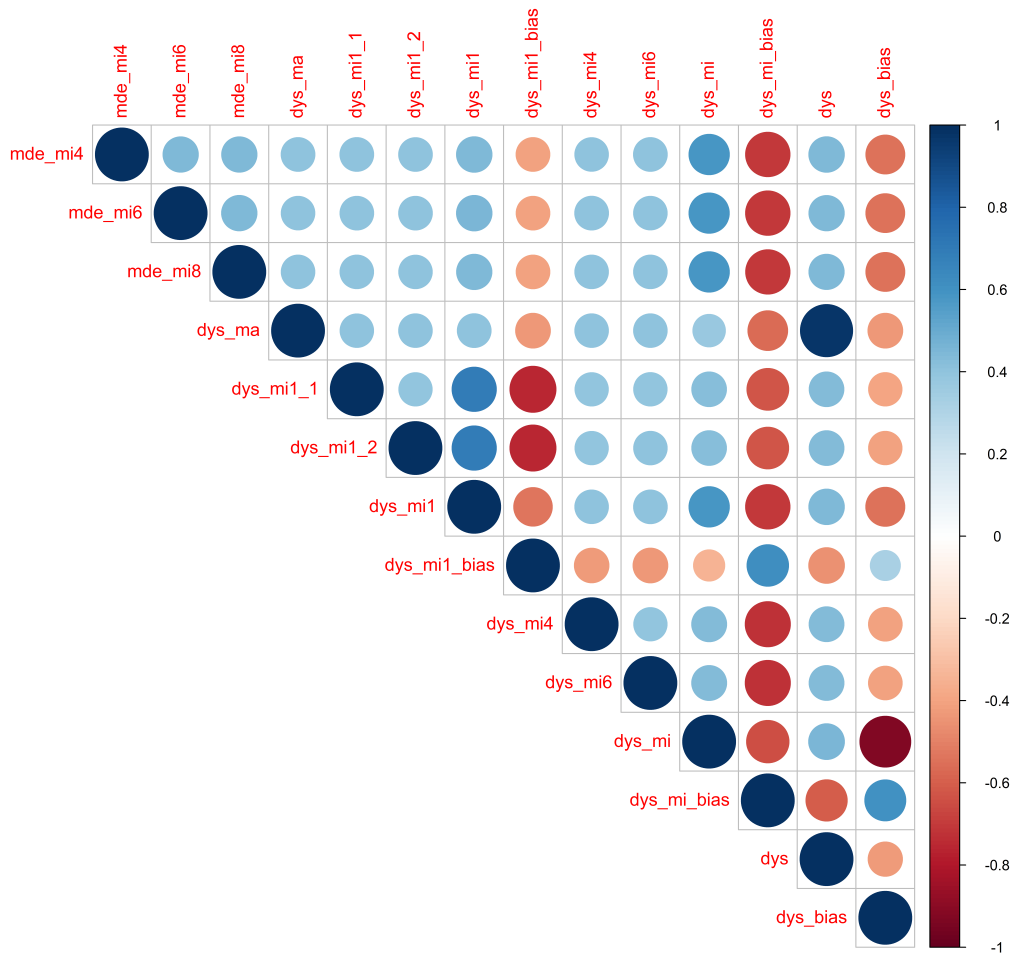

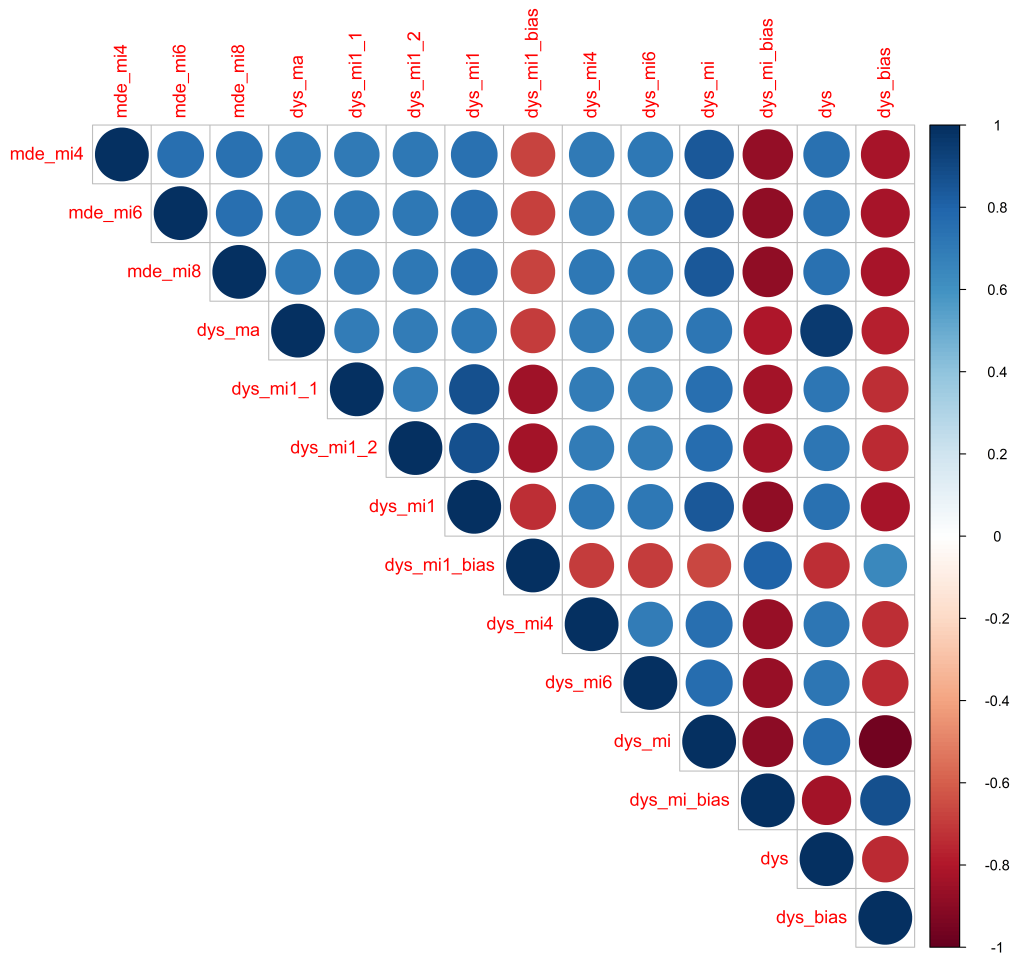



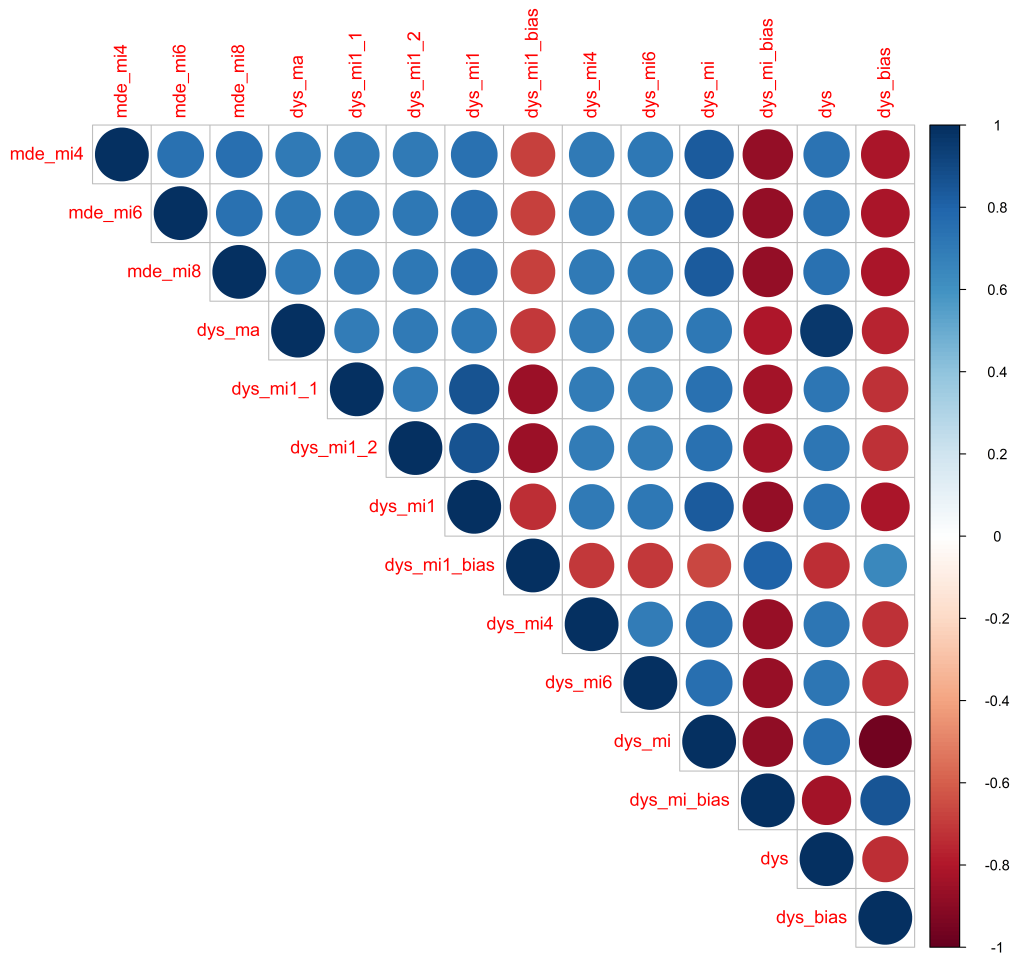

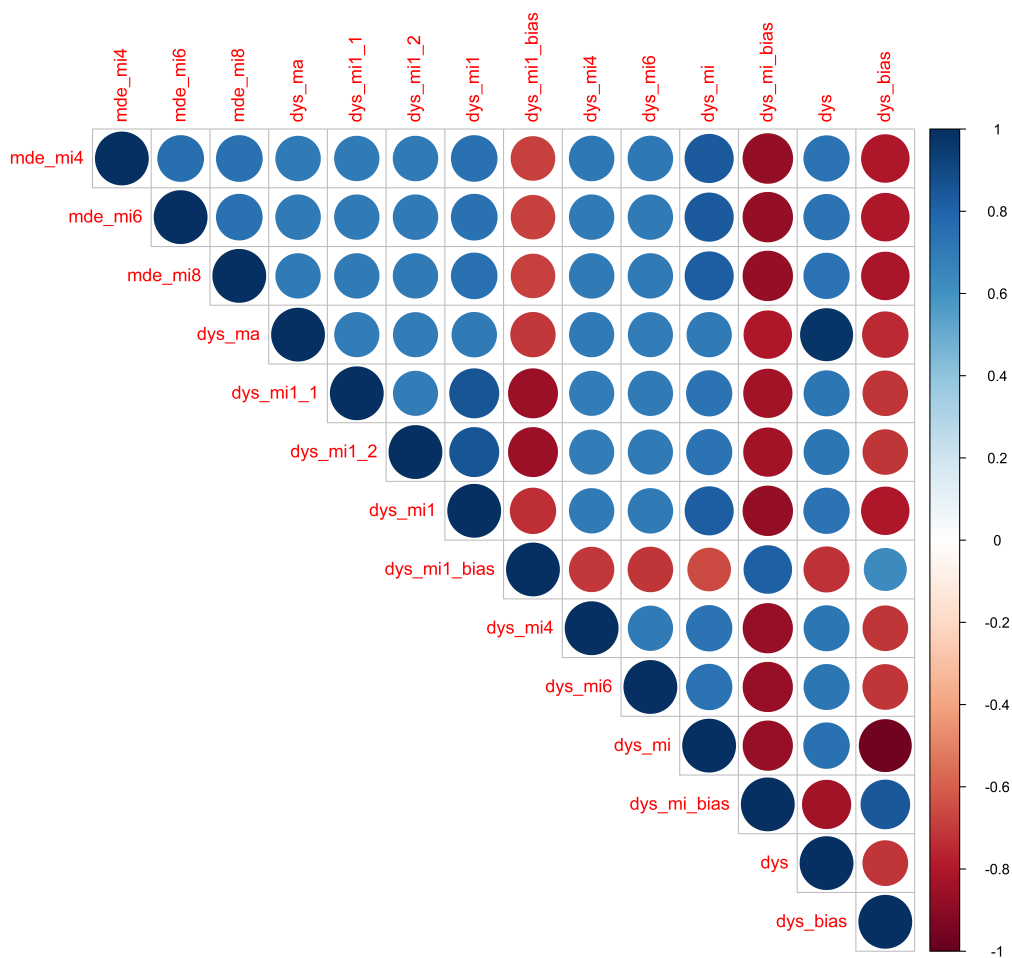

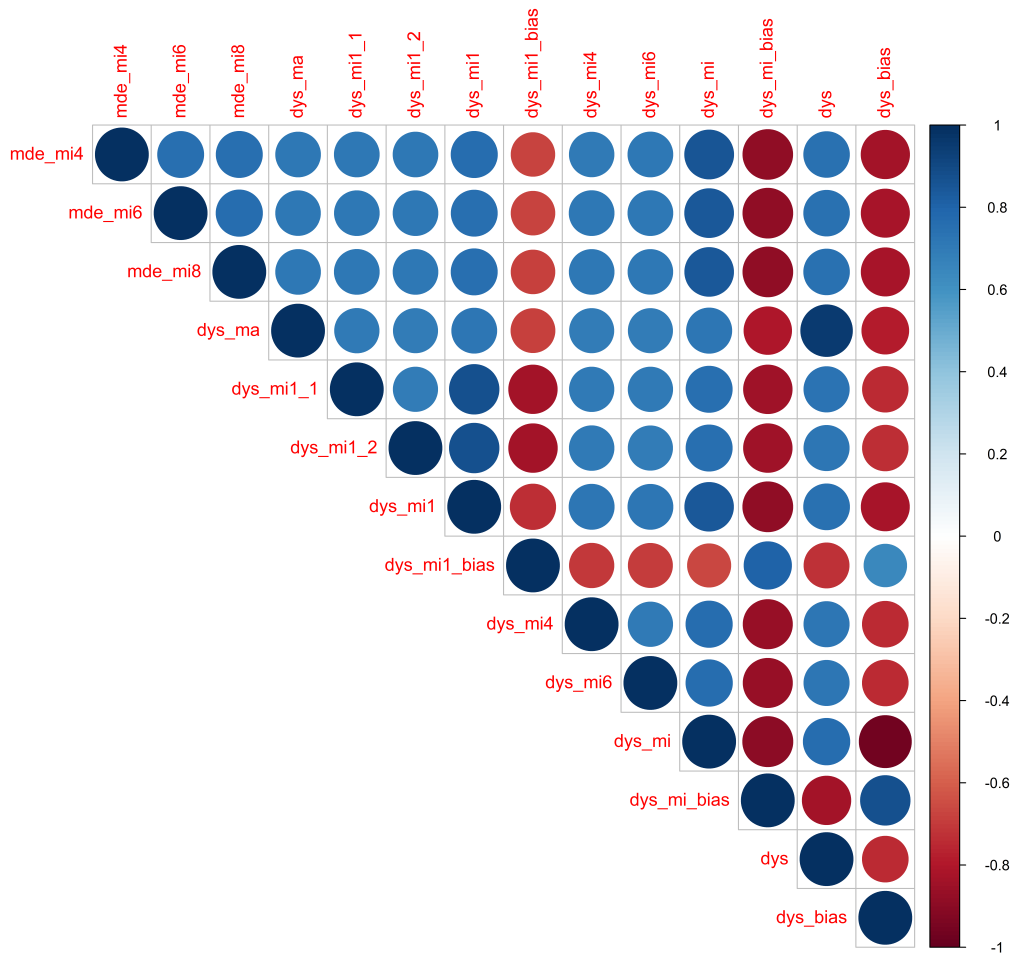

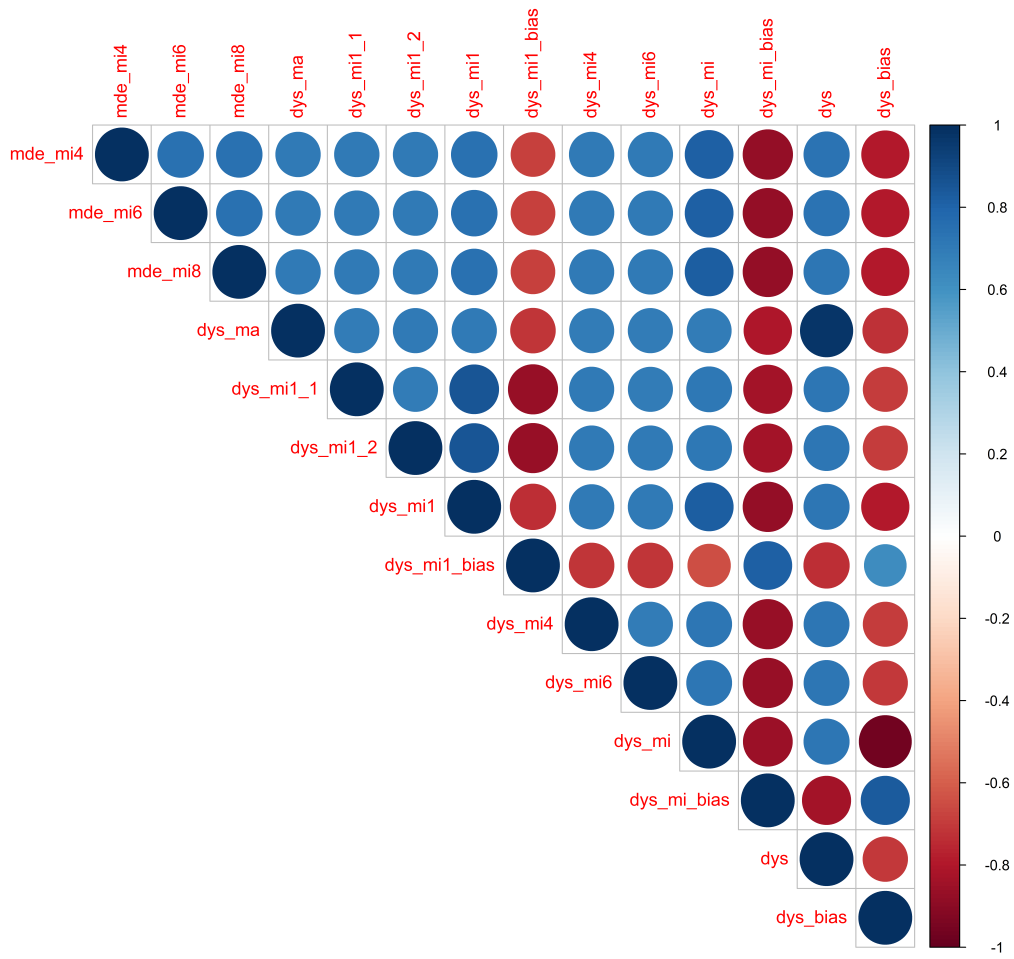

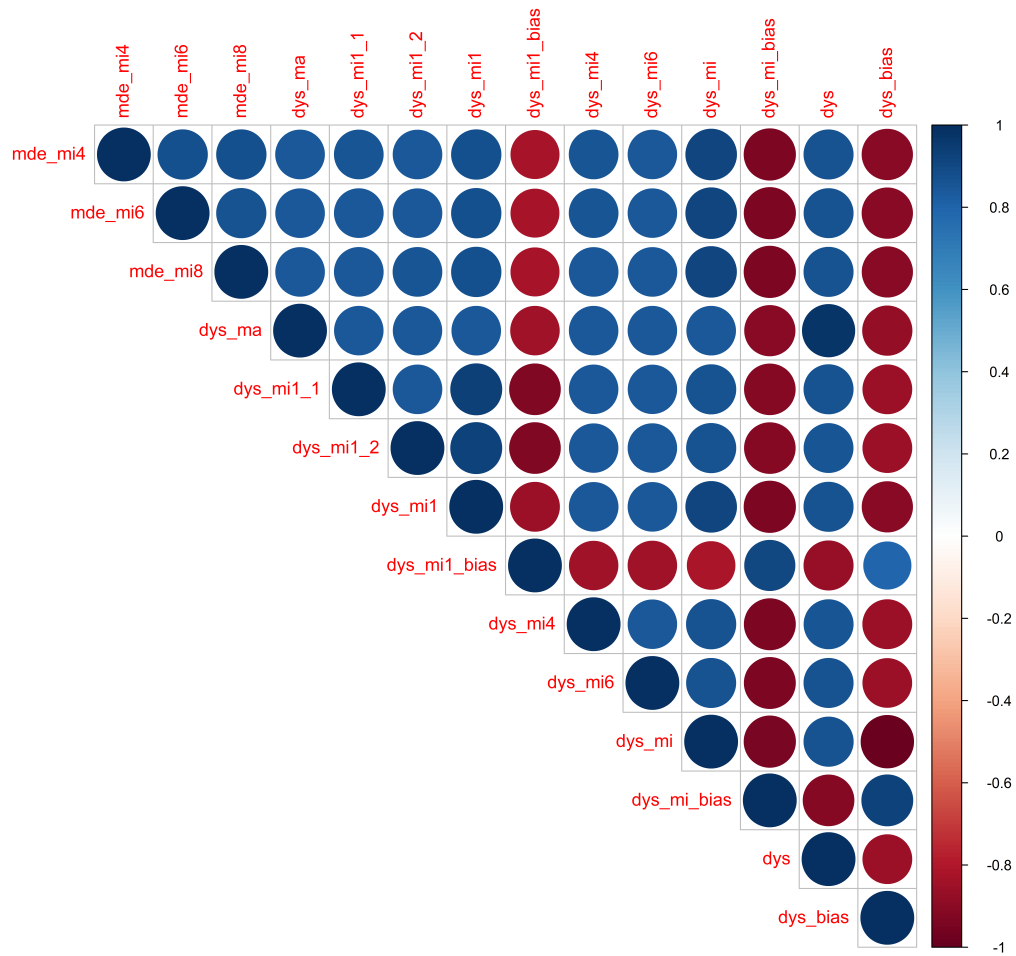

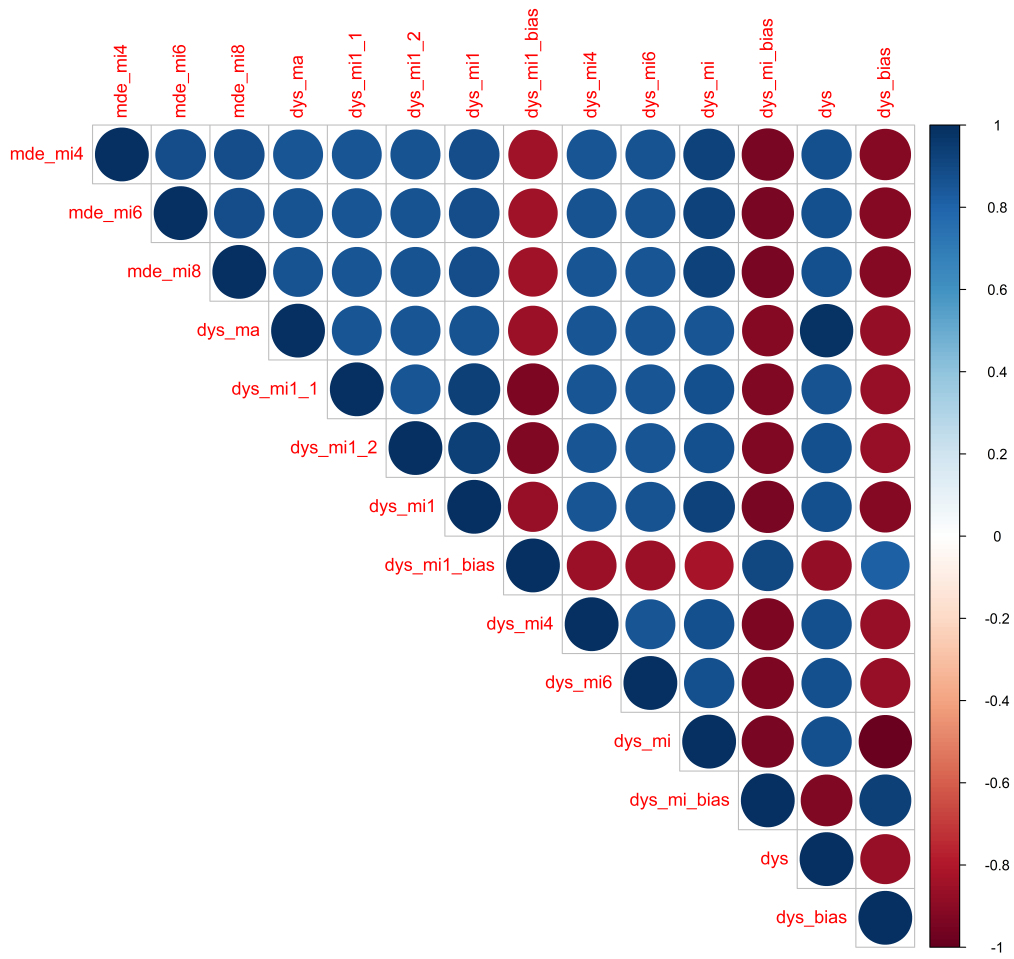

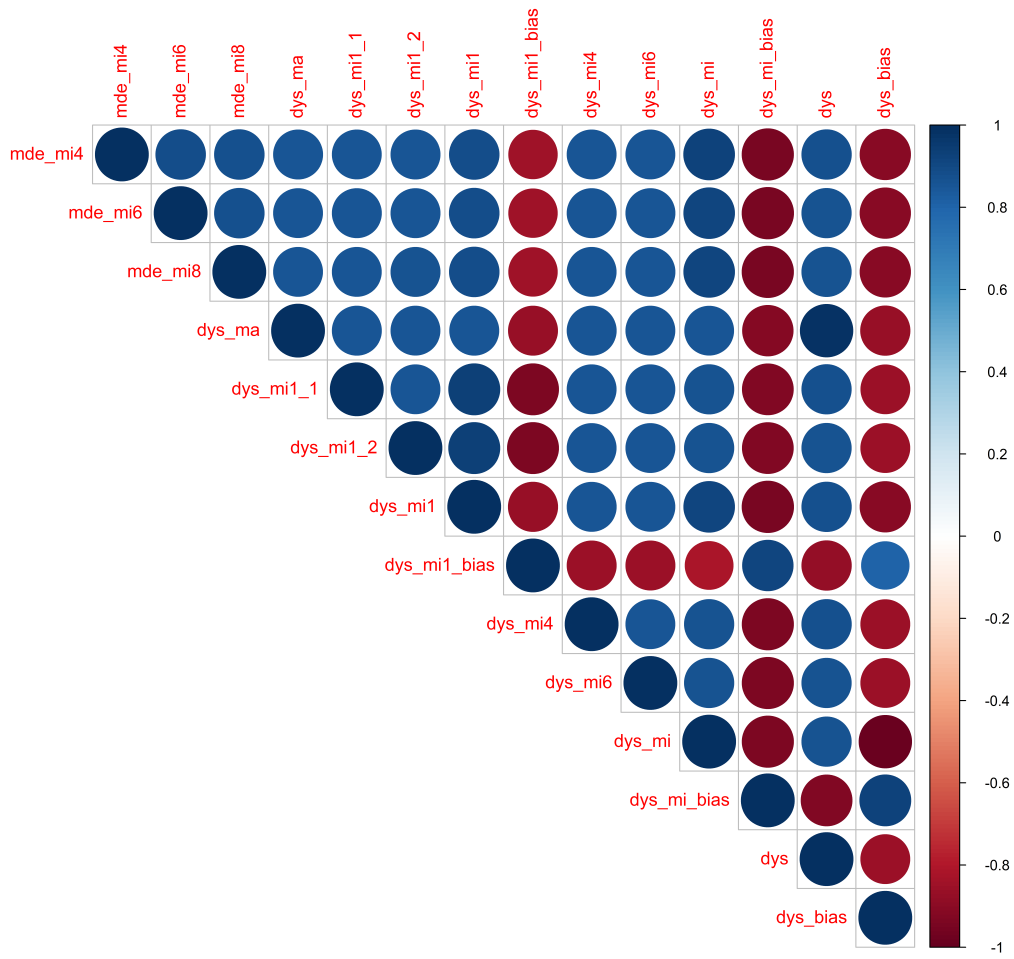

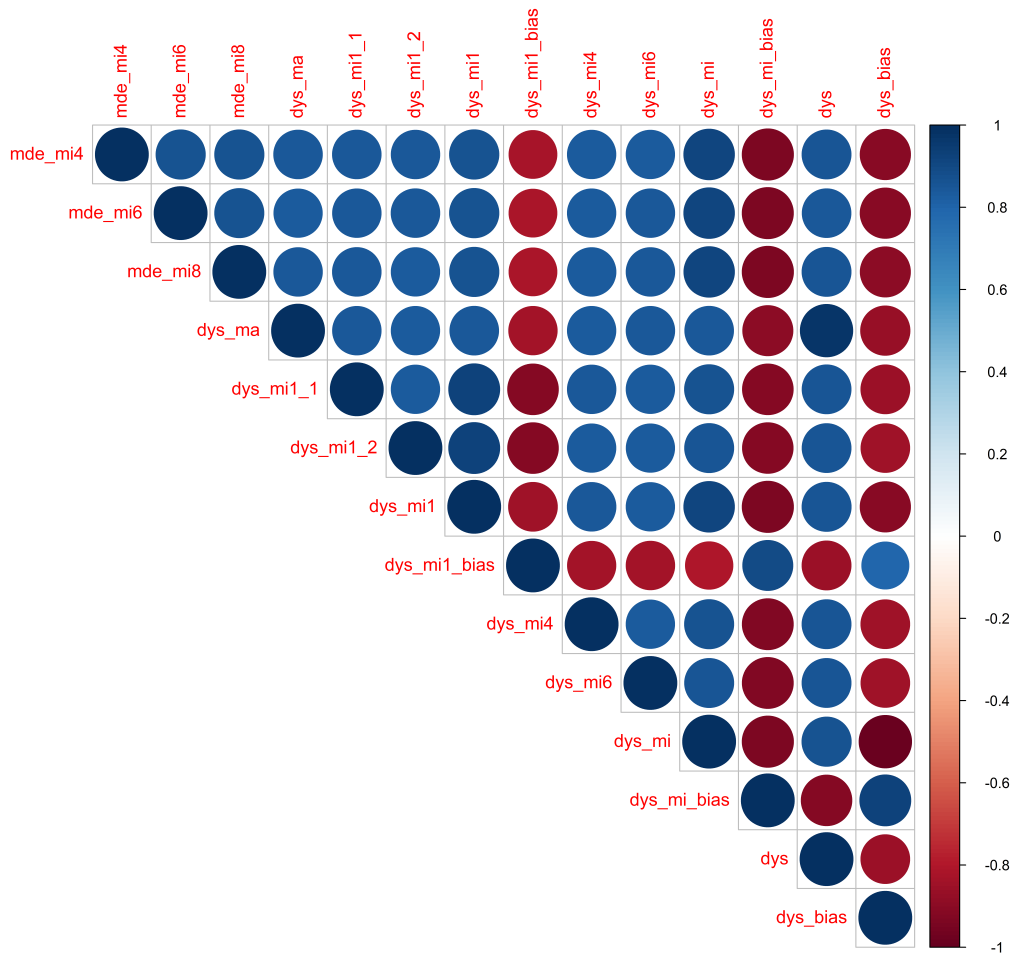



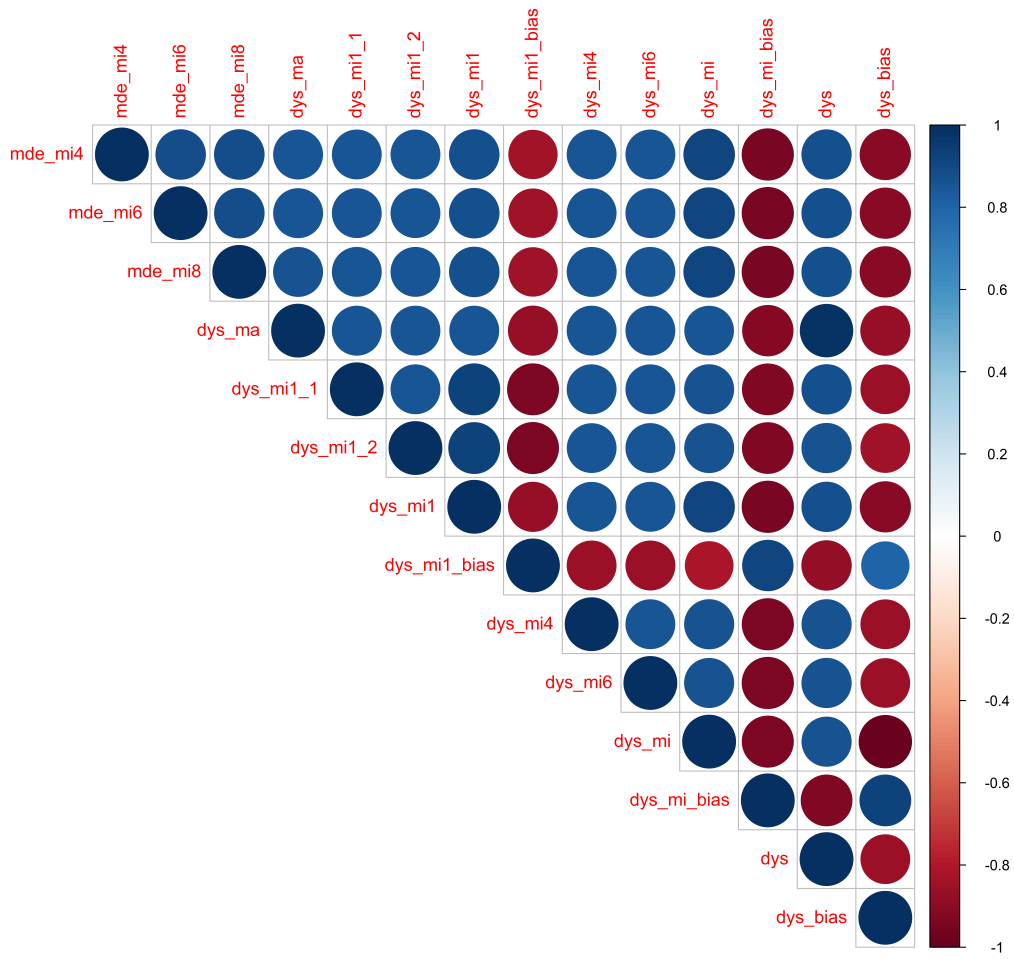

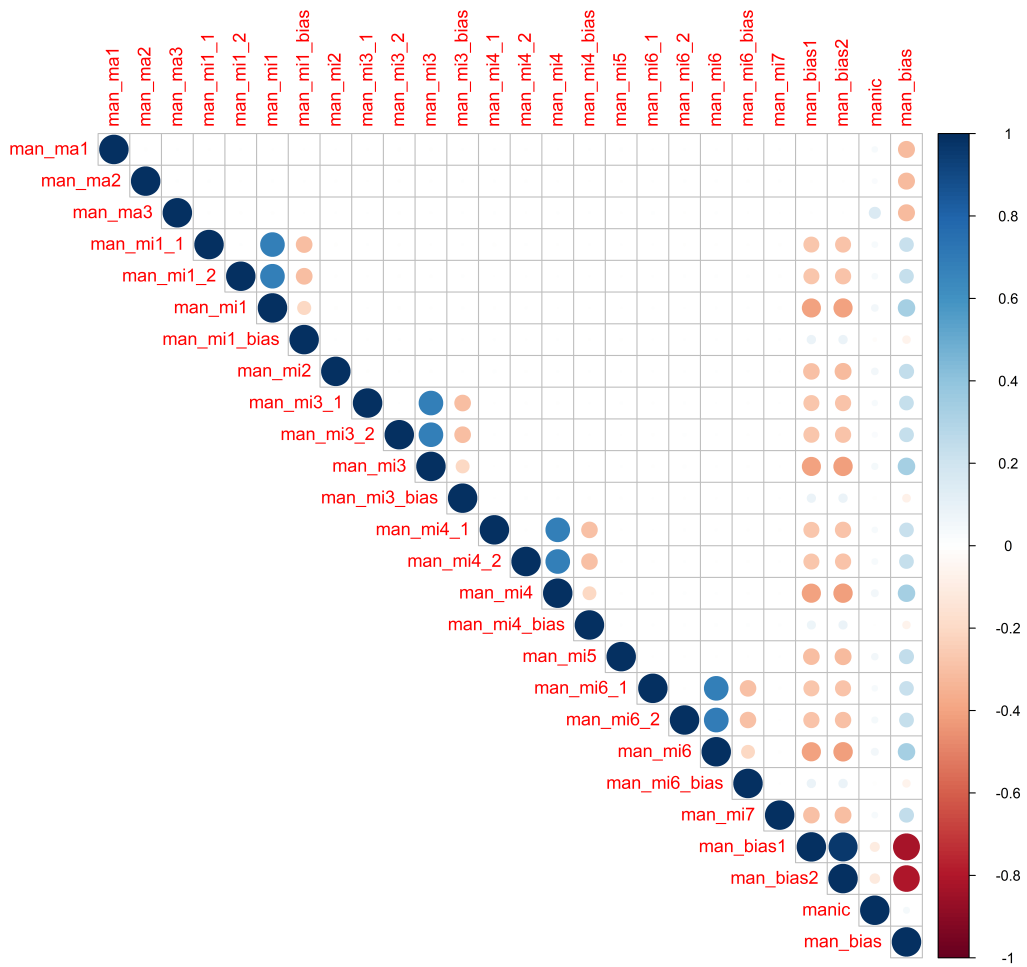

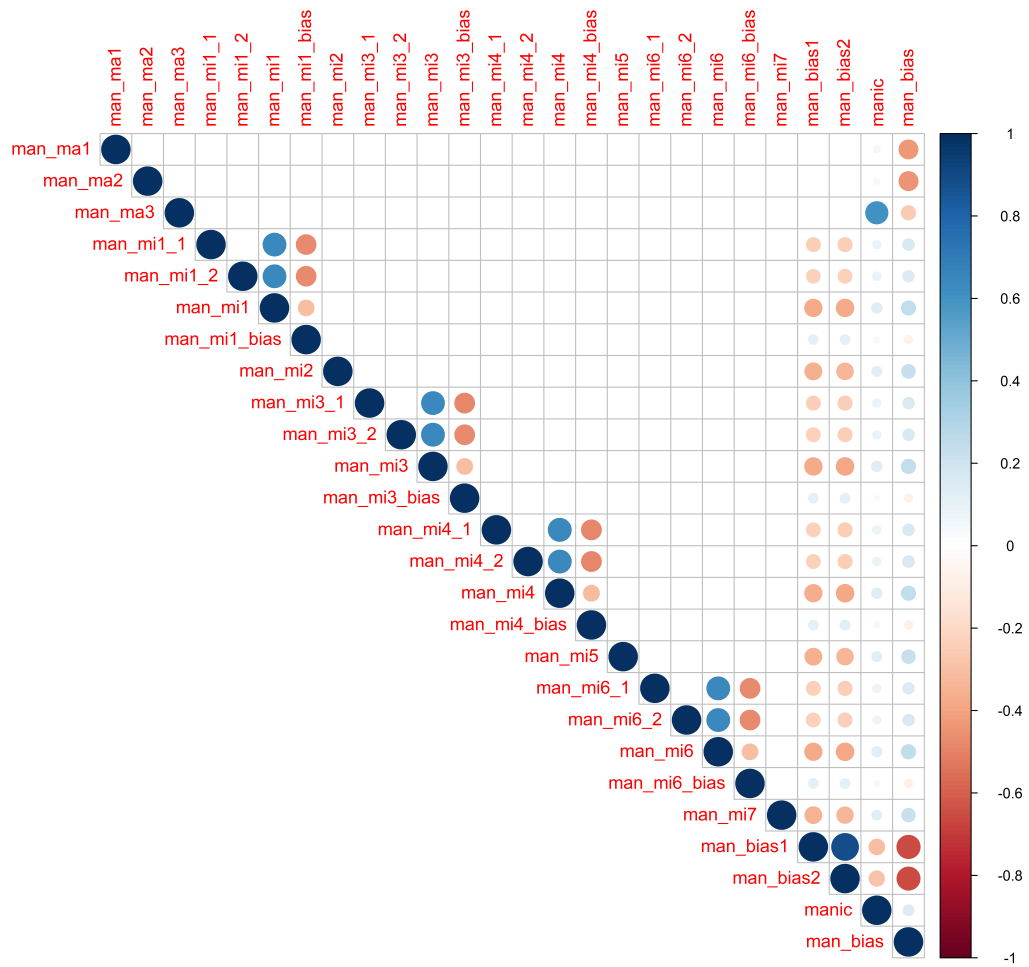

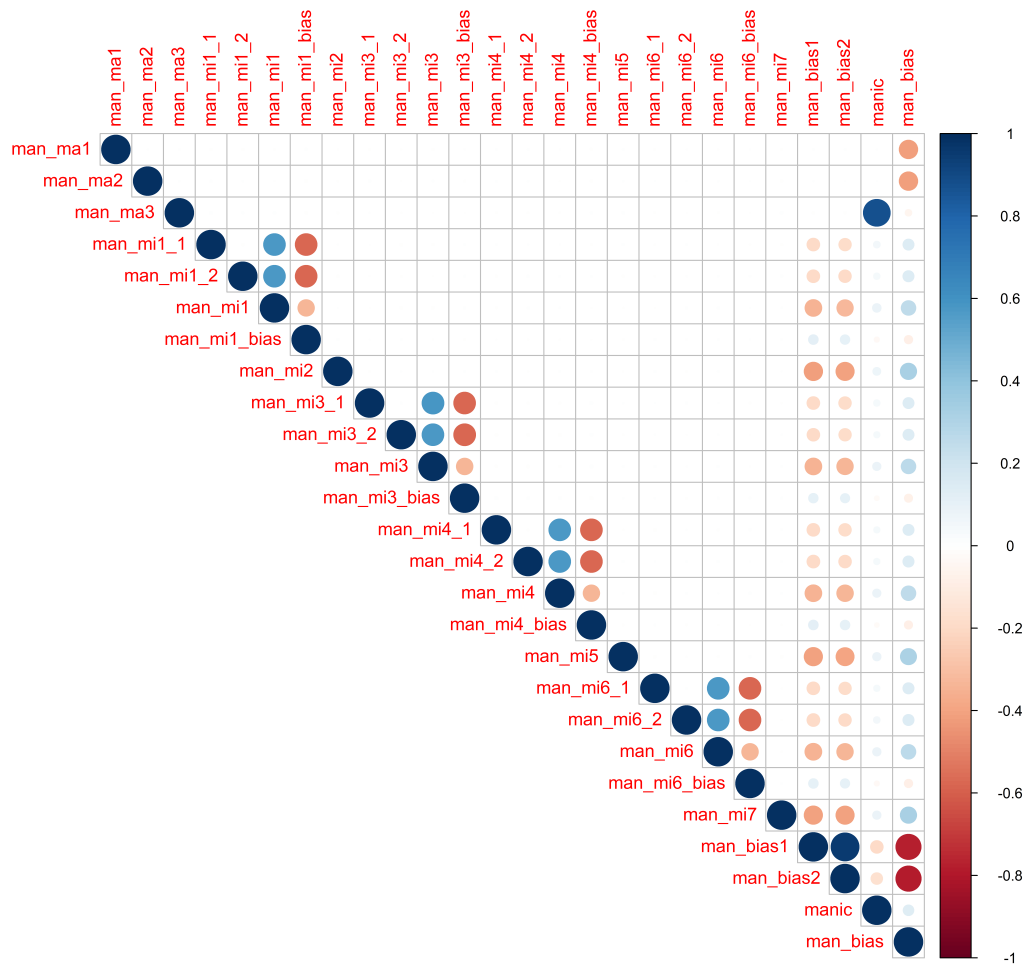

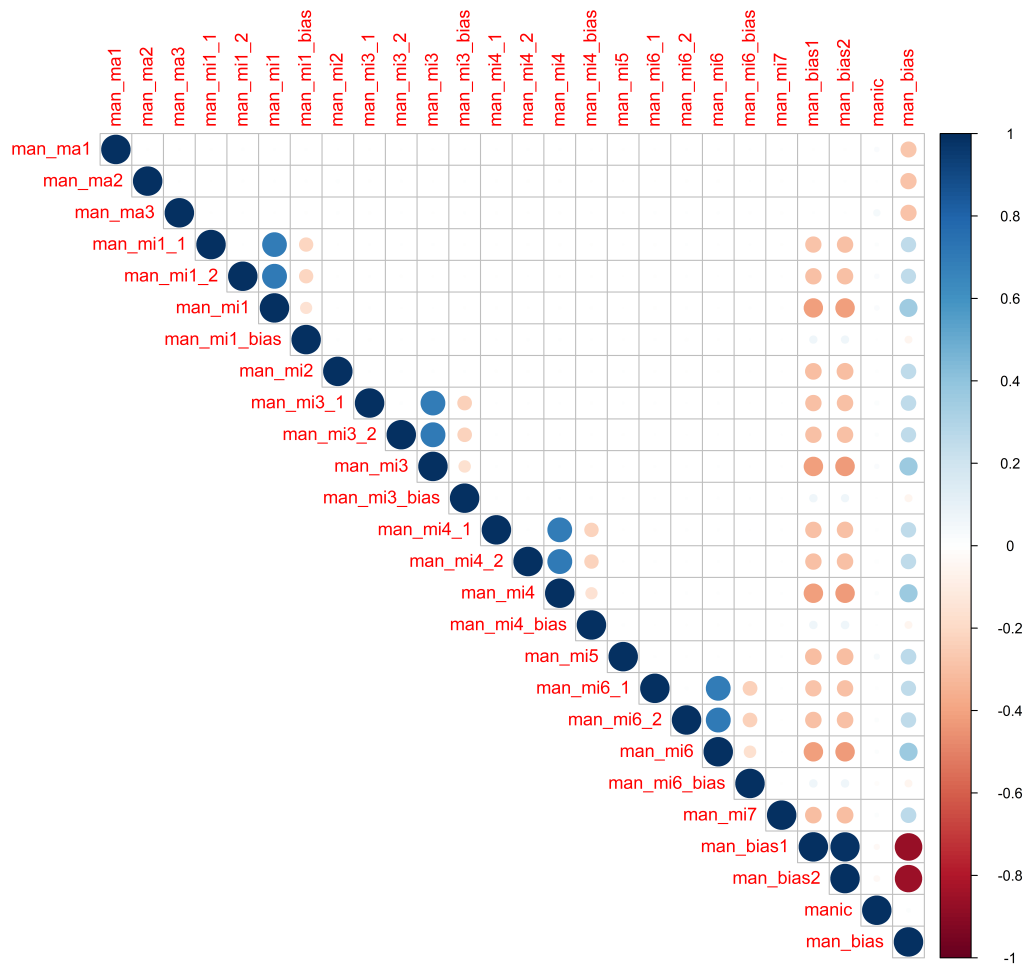

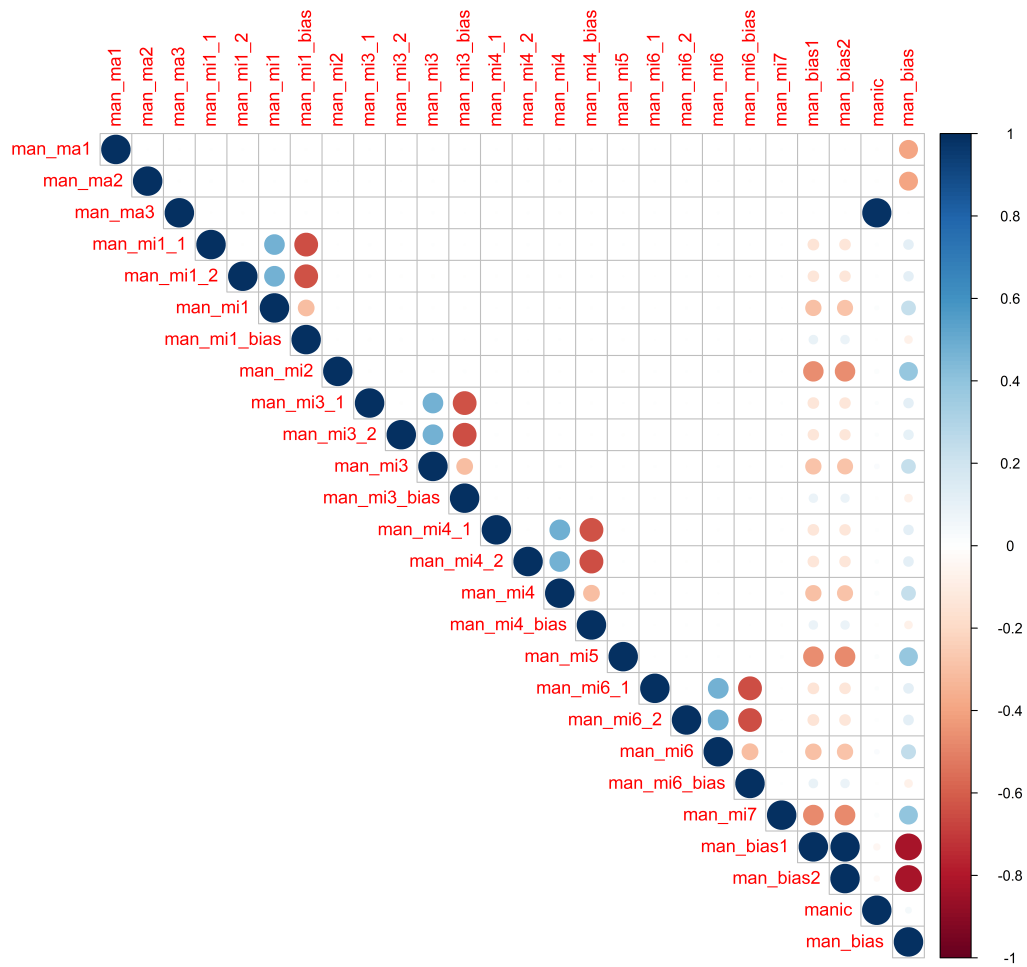

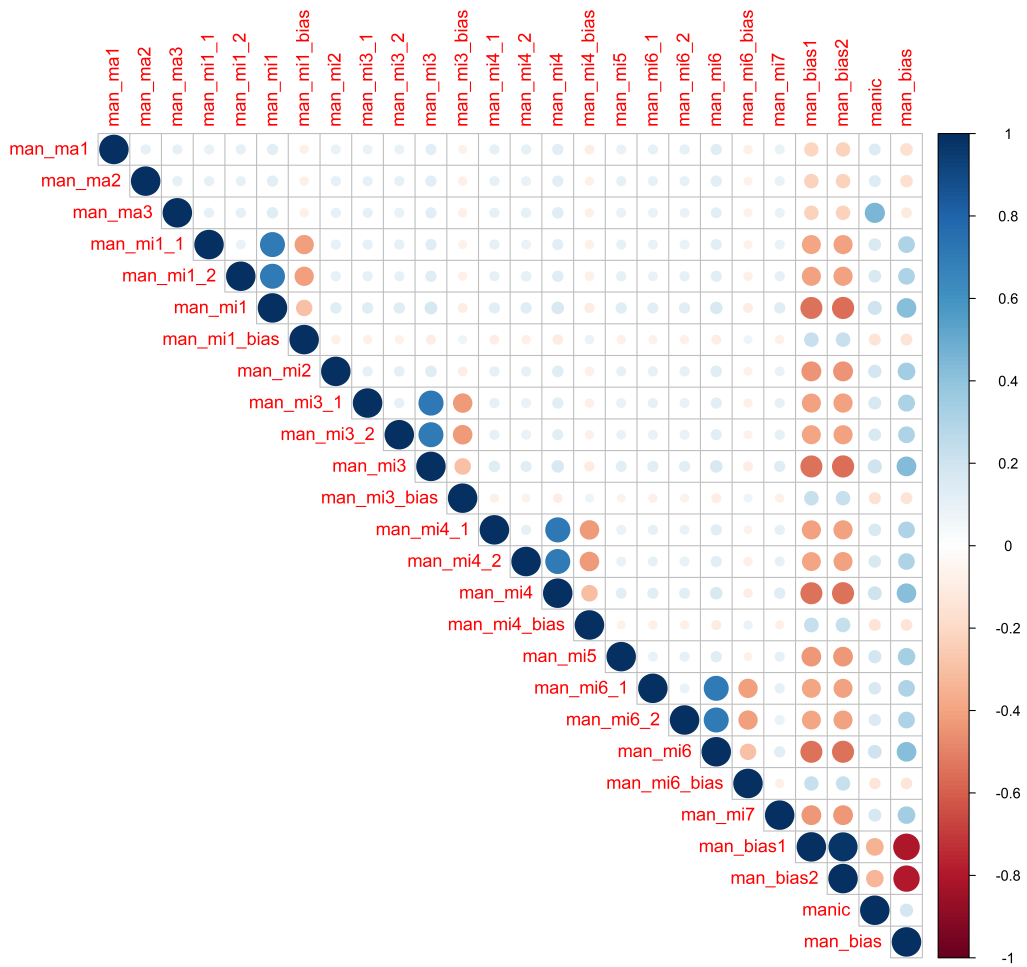

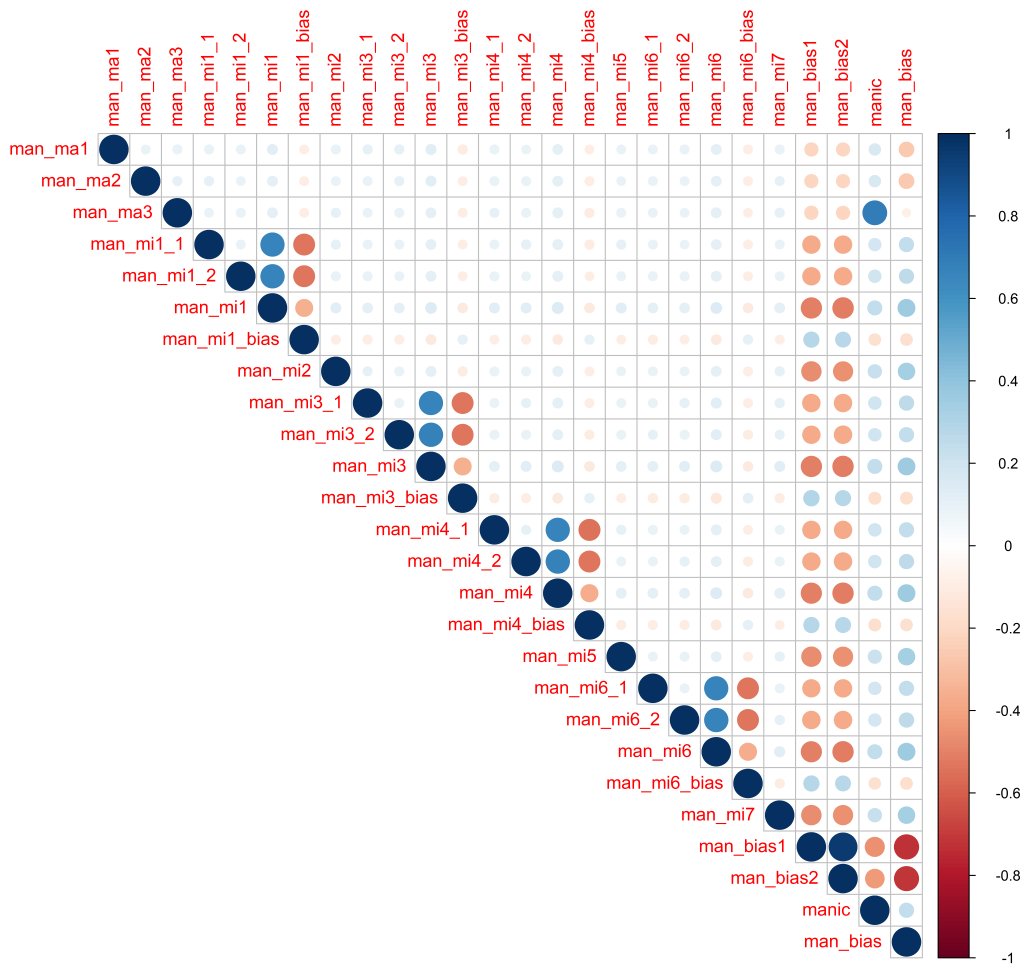



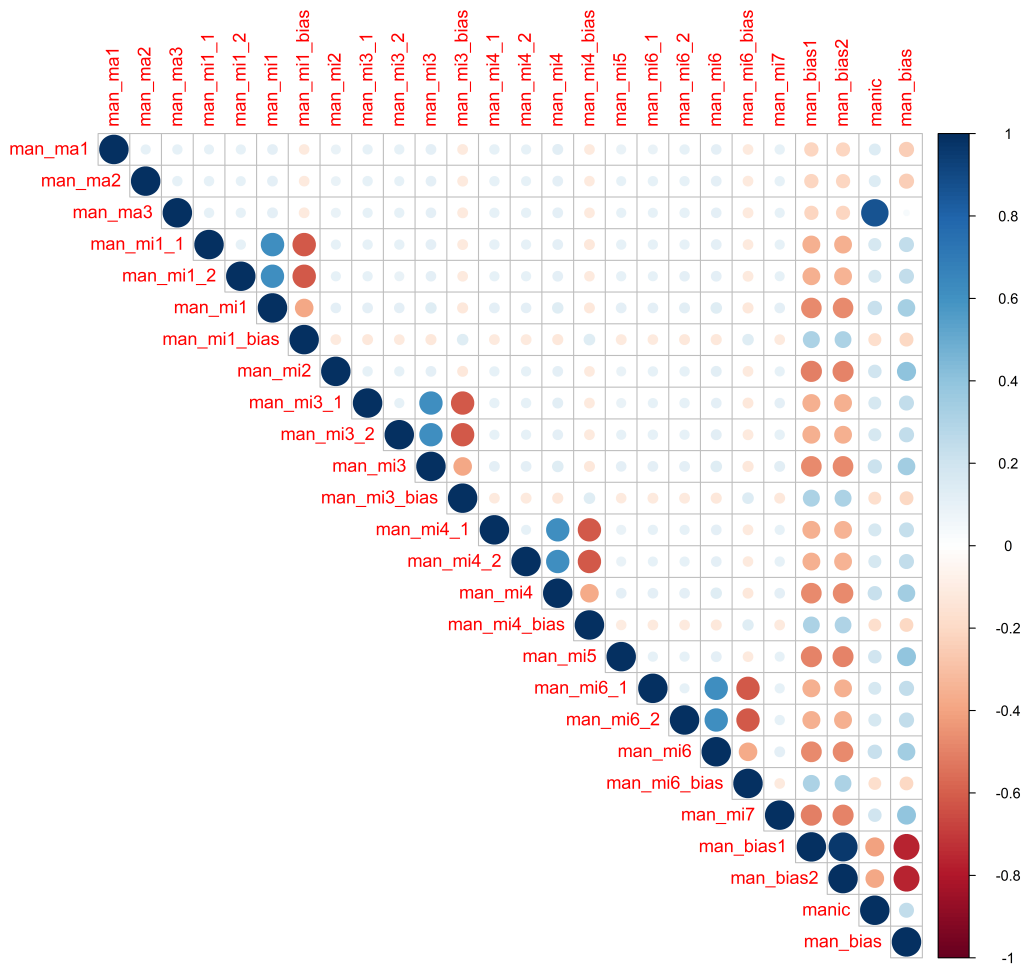

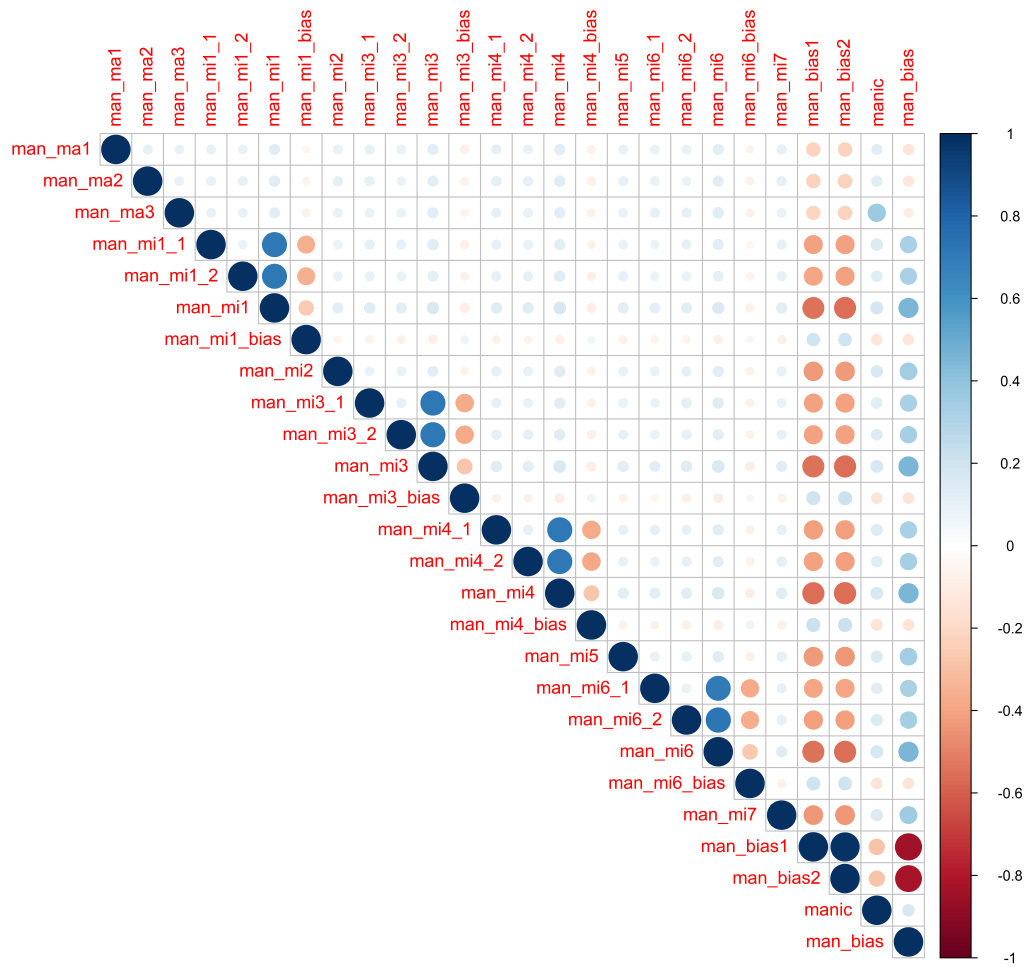

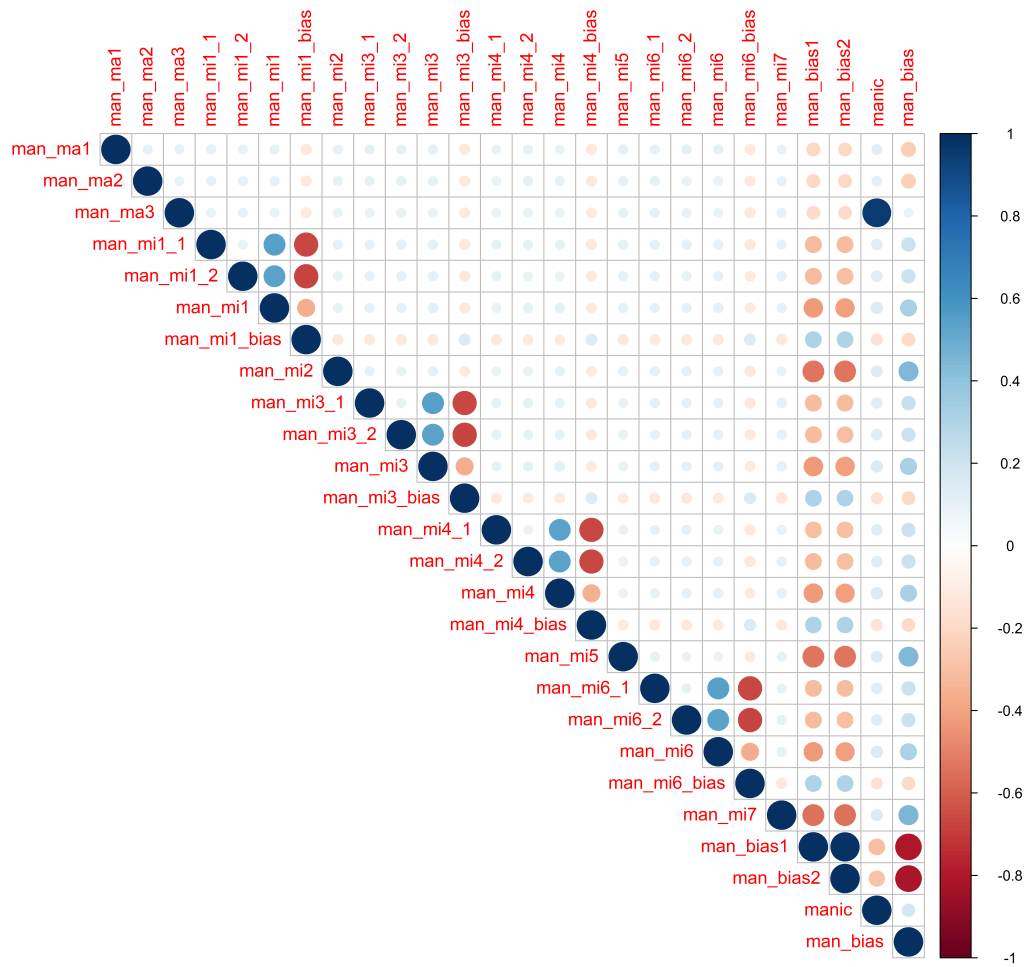

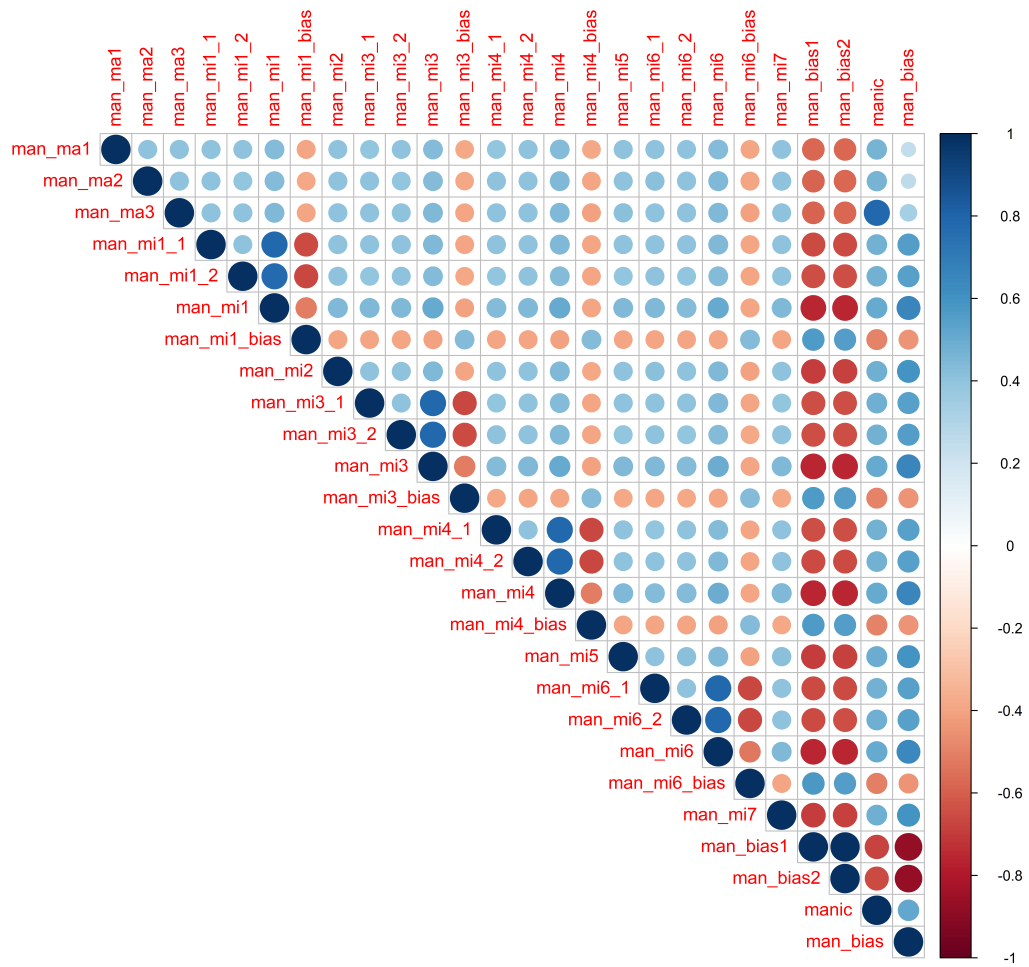

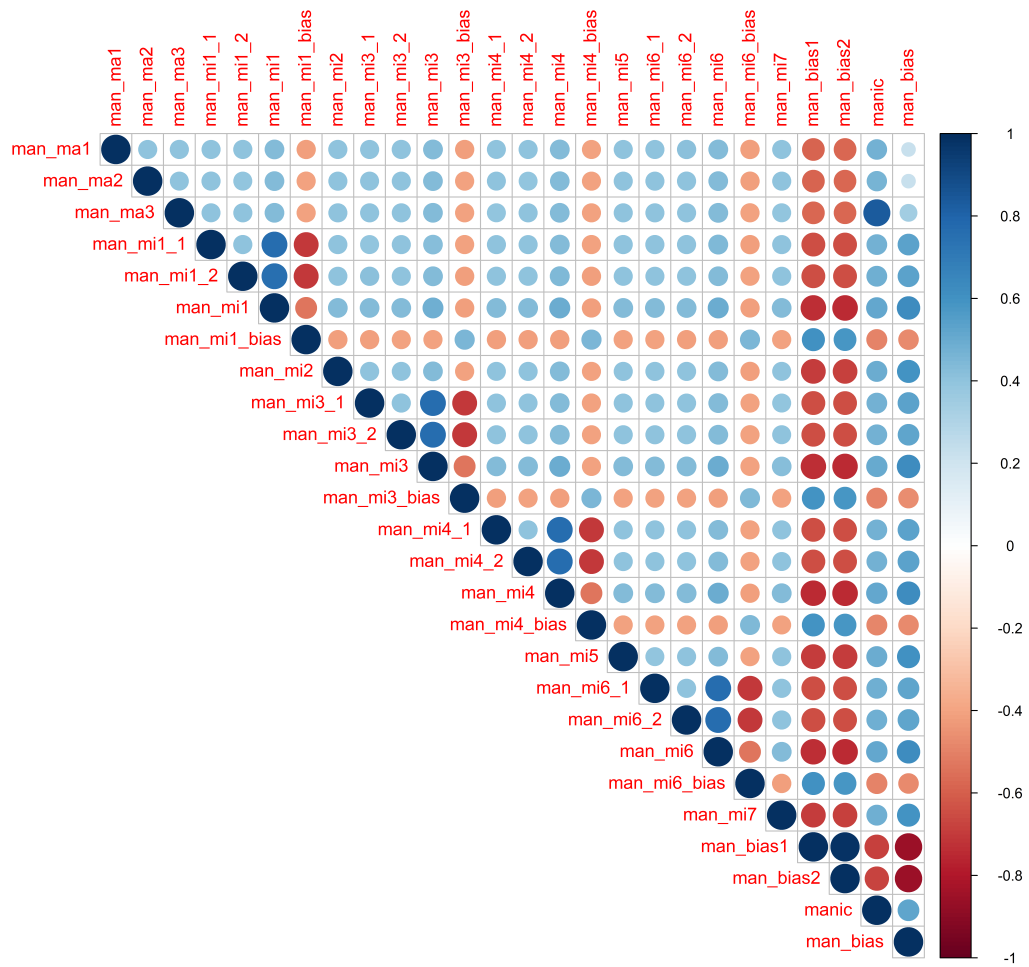

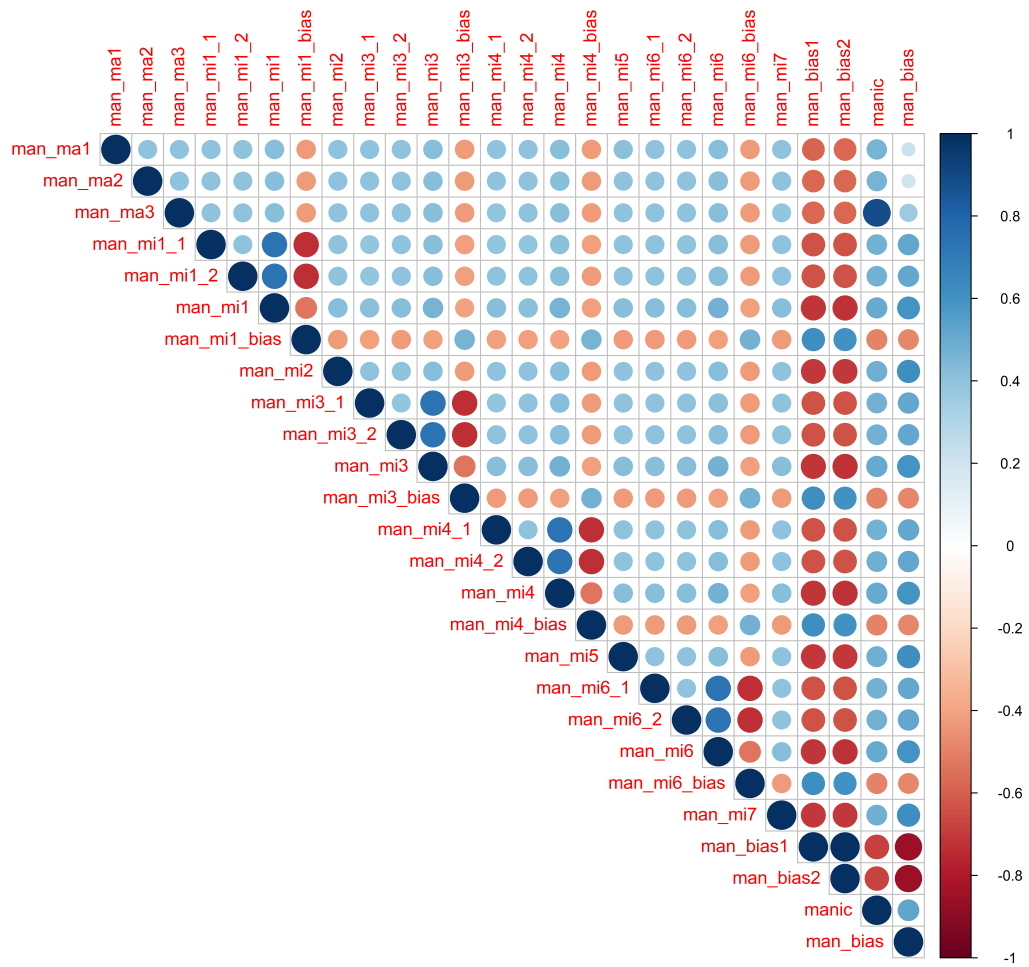

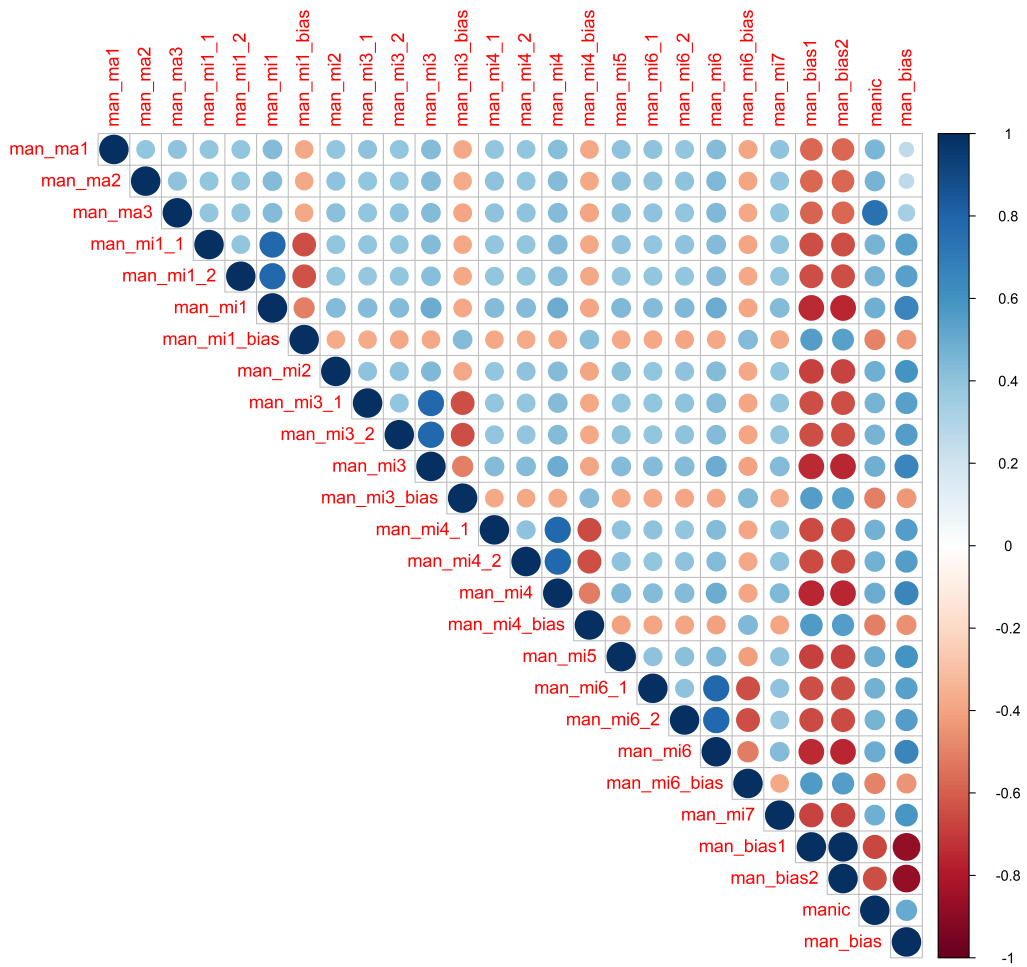

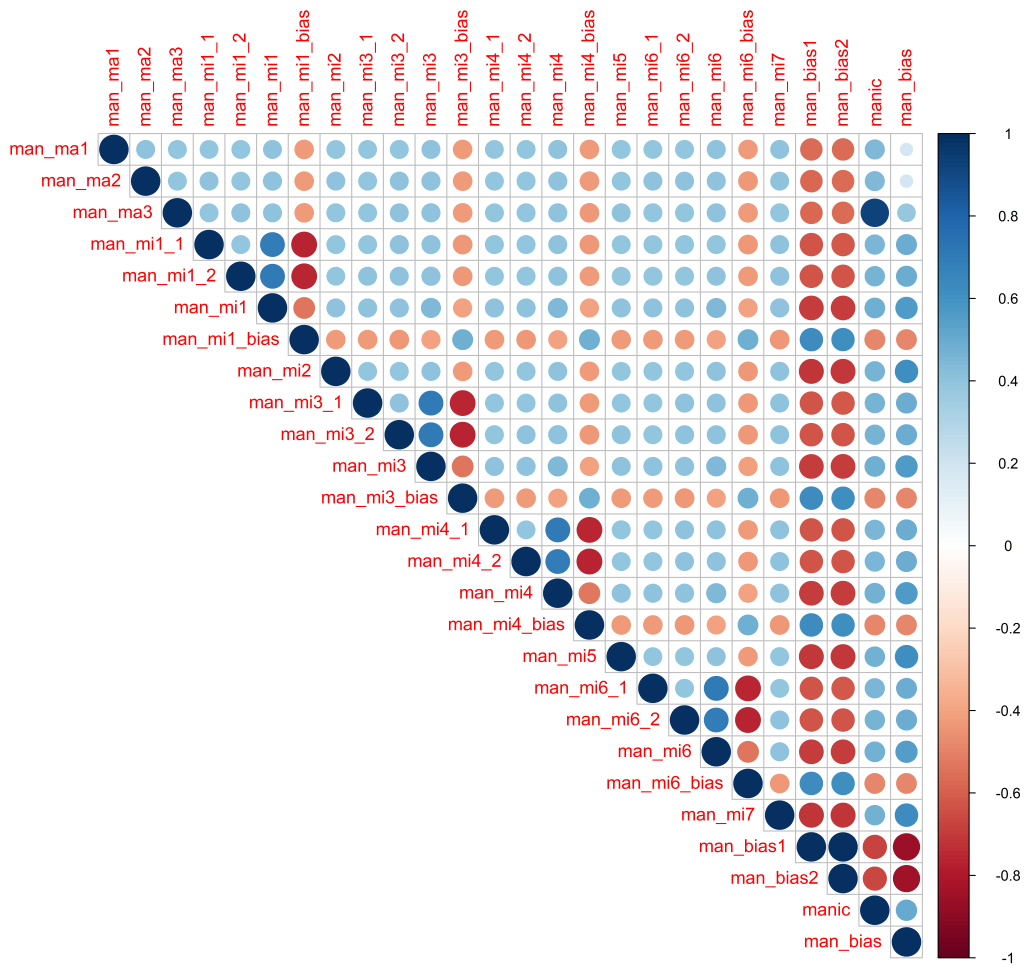

Supplement: bmjopen-2020-037022supp001.pdf [file bmjopen-2020-037022supp001.pdf]
